# Supplementary material for: Reduced endothelial activation upon human blood perfusion of pig kidney xenografts lacking MHC class I and three xenoantigens
Source: Research Square preprint supplement (doi:10.21203/rs.3.rs-1146675/v1), 2022-01-05
Supplement: Supplementary file 1 [file 0d6c789d5094b7cb38dafab6.xlsx]

## Sheet: cell numbers
Table S3: cell numbers before and after in silicon selection
Sample ID	Sample Type a	genotype b	perfused blood origin c	Total features d	Cell number before filtering e	Cell number after filtering by mt% and feature number f	Cell number after exclusion of PTPRC/CD37/CD53/HBB/CCL21 positive cells g	Cell number after inclusion of PECAM1/CDH5/ICAM2 positive cells h
1	medullary renal ECs	WT	pig	14734	6325	6294	5950	4117
2	medullary renal ECs	WT	human	14077	3520	3212	3023	2561
3	medullary renal ECs	KO	human	14651	7015	6410	5807	3767
4	medullary renal ECs	KO	pig	14563	7445	7165	6796	4256
5	Cortical renal ECs	WT	pig	14958	16340	16319	15716	14476
6	Cortical renal ECs	WT	human	15217	20539	20032	19818	17375
7	Cortical renal ECs	KO	human	14969	14921	14654	14585	8657
8	Cortical renal ECs	KO	pig	14609	17883	17859	17657	14931
a specific region where the cells were isolated from
b genotype of the perfused kidney
c the blood origin used for perfusion
d total number of features expressed in one sample
e total cell number detected in one sample before filtering
f total cell number after removing dead/dying cells by percentage of mitochondial gene expression, and the debrids /doublet by number of features expressed in each cell
g total cell number after exclussion of lympatic cells(CCL21), red blood cells (HBB), aand immune cells (PRPTC/CD37/CD53)
h total cell number after inclusion of endothelial cells (PECAM1/CDH5/ICAM2)
