# Supplementary material for: Reduced endothelial activation upon human blood perfusion of pig kidney xenografts lacking MHC class I and three xenoantigens
Source: Research Square preprint supplement (doi:10.21203/rs.3.rs-1146675/v1), 2022-01-05
Supplement: Supplementary file 2 [file 3f576145c5d1652212e4ad40.xlsx]

## Sheet: perfusion parameters
WT Human Blood							KO Human Blood
Time (min)	0	30	90	180	360		Time (min)	0	30	90	180	360
pO2 (mmHg)	47	442	495	384	498		pO2 (mmHg)	32	330	394	399	419
pCO2 (mmHg)	53.9	44.9	40.9	38.4	44.3		pCO2 (mmHg)	50	22.4	24.7	29.6	38.6
pH	6.814	7.326	7.552	7.733	7.58		pH	6.756	6.802	6.701	6.73	7.173
BE	-25	-3	12	29	18		BE	-27	-30	<-30	<-30	-13
HCO3- (mmol/L)	8.6	23.4	35.9	51.3	41.5		HCO3- (mmol/L)	7	3.5	3.1	3.9	14.2
sO2	0.47	1	1	1	1		sO2	0.23	1	1	1	1
Hct	0.33	0.33	0.31	0.3	<>		Hct	0.28	31	0.35	0.37	<>
Hb (mmol/L)	7	7	6.5	6.3	<>		Hb (mmol/L)	5.9	6.5	7.4	7.8	<>
Lactate (mmol/L)	16.06	14.11	13.93	6.77	4.23		Lactate (mmol/L)	14.97	78	19.78	>20	>20
Sodium (mmol/L)	134	141	146	150	>180		Sodium (mmol/L)	131	127	129	135	>180
Potassium (mmol/L)	6.2	3.6	4.3	6	9		Potassium (mmol/L)	5.87	11.7	10.8	11	11.2
