# Supplementary material for: Reduced endothelial activation upon human blood perfusion of pig kidney xenografts lacking MHC class I and three xenoantigens
Source: Research Square preprint supplement (doi:10.21203/rs.3.rs-1146675/v1), 2022-01-05
Supplement: Supplementary file 3 [file 624fb75dcae82068c551e52d.xlsx]

## Sheet: Cortex
Table S6. Immune DEGs cRECs
WT_up regulated					WT_down regulated					4KO_up regulated					4KO_down regulated
feature	logFC	padj			feature	logFC	padj			feature	logFC	padj			feature	logFC	padj
CXCL2	2605	0			FABP5	-3101	0			CXCL2	2460	0			TXNIP	-2890	0
ISG15	2216	0			TXNIP	-2952	0			FOS	2270	0			FABP5	-1499	0
HSP90AB1	2102	0			CD34	-1391	0			ISG15	2253	0			TEK	-1272	0
EIF4A1	2066	0			CFD	-1258	0			UBB	2137	0			APP	-1042	0
NFKBIA	1872	0			TEK	-1190	0			HSP90AB1	1586	0			CD34	-0.973	0
SDCBP	1679	0			RASAL2	-1120	0			EIF4A1	1468	0			PTPRB	-0.935	0
CTSV	1663	0			APP	-1046	0			UBC	1301	0			B2M	-0.266	0
FOS	1653	0			CD36	-0.988	0			HBEGF	1256	0			LAMP1	-0.322	1.18e-40
UBB	1583	0			SLC44A2	-0.934	0			TUBB4B	1231	0			IL15	-0.346	1.29e-63
TUBB4B	1445	0			SLA-DMB	-0.858	0			ACTG1	1225	0			CD47	-0.307	1.52e-34
CD40	1356	0			CD93	-0.799	0			DUSP5	1220	0			RAPGEF4	-0.383	1.68e-51
IER3	1332	0			SLA-DQB1	-0.718	0			SDCBP	1216	0			GRN	-0.266	1.9e-24
PLAUR	1253	0			PTPRB	-0.699	0			NFKBIA	1172	0			ANO6	-0.282	2.16e-30
PNP	1213	0			AKAP9	-0.651	0			IER3	1064	0			RASGRF2	-0.276	2.54e-59
DDX3X	1166	0			SLA-DMA	-0.607	0			EIF4A2	1032	0			CD93	-0.25	2.68e-25
RNF19B	1141	0			IL15	-0.59	0			CLEC2B	1025	0			CPNE3	-0.353	3.29e-44
TNFAIP3	1125	0			SLA-DOA	-0.583	0			RNF19B	1012	0			CANX	-0.313	4.46e-36
TUBB	1123	0			RAPGEF2	-0.521	0			WSB1	0.979	0			YWHAB	-0.483	4.47e-97
IRF1	1090	0			JUP	-0.465	0			IRF1	0.923	0			CFD	-0.349	5.28e-43
ICAM1	1088	0			RASGRF2	-0.351	0			ICAM1	0.895	0			PSMA6	-0.29	5.68e-29
HBEGF	1071	0			PSAP	-0.355	1.04e-223			PLAUR	0.87	0			DNAJC3	-0.264	9.23e-26
PGM2	1038	0			IRF3	-0.261	1.08e-242			TNFAIP3	0.836	0			AKAP9	-0.547	1.28e-112
DHX9	0.999	0			CPNE3	-0.44	1.26e-238			POLR2K	0.802	0			RASAL2	-0.591	2.24e-165
DUSP5	0.954	0			GRK2	-0.31	1.34e-210			EIF4E	0.779	0			CD36	-0.932	2.31e-273
IL6ST	0.927	0			DNM3	-0.32	1.4e-166			TUBB	0.777	0			SLC44A2	-0.652	4.2e-184
POLR2K	0.919	0			IRF2	-0.257	1.76e-115			PNP	0.767	0			ITGB1	-0.561	8.81e-243
TLR4	0.915	0			CST3	-0.326	3.33e-127			PTPN1	0.763	0
PSMA2	0.908	0			LAMP1	-0.344	4.38e-138			NFKBIB	0.761	0
VCAM1	0.891	0			CAMK2G	-0.259	4.51e-267			UBE2A	0.754	0
VCP	0.863	0			RAPGEF4	-0.421	7.11e-218			PELI1	0.732	0
CCT8	0.83	0			CTSF	-0.28	8.36e-290			SUMO1	0.628	0
WSB1	0.795	0			SPTAN1	-0.334	8.84e-213			LCK	0.627	0
KIT	0.794	0			PSMB8	-0.289	9.77e-101			DYNLL1	0.614	0
NFKBIB	0.78	0			SLPI	-0.414	9.96e-213			ACTR3	0.603	0
SQSTM1	0.759	0								JAK2	0.537	0
PSMD7	0.758	0								POLR1D	0.533	0
PSME2	0.744	0								NFKBIE	0.522	0
S100A11	0.734	0								MAP3K8	0.45	0
ILF2	0.681	0								IL6	0.423	0
IL4R	0.669	0								IL4R	0.416	0
CALR	0.668	0								MAPKAPK2	0.411	0
EEF2	0.657	0								GLA	0.377	0
EIF4E	0.653	0								TLR4	0.367	0
PSMD8	0.64	0								PLAU	0.352	0
DEGS1	0.634	0								RELB	0.317	0
PSMA6	0.617	0								SEC24A	0.295	0
RELB	0.598	0								CLU	0.271	0
ACTR3	0.576	0								RHOA	0.324	1.19e-31
RAB10	0.567	0								IL6ST	0.293	2.29e-73
YWHAZ	0.551	0								EEF2	0.348	6.42e-17
PELI1	0.535	0								CALM1	0.37	7.29e-69
UBC	0.531	0								PIP5K1A	0.296	1.03e-252
MAP3K8	0.527	0								RAP1B	0.669	1.34e-219
KPNB1	0.527	0								CALR	0.575	1.48e-114
SRP14	0.516	0								S100A11	0.511	1.66e-149
UBE2L6	0.512	0								KPNB1	0.372	1.7e-163
IL6	0.498	0								DDX3X	0.799	1.73e-229
PTPN1	0.497	0								CTSV	0.609	2.13e-165
PTPN2	0.49	0								RNF19A	0.55	2.33e-233
OSMR	0.481	0								DHX9	0.559	2.67e-236
CLEC2B	0.474	0								SQSTM1	0.508	2.7e-206
NFKBIE	0.47	0								RPS6KA3	0.303	2.95e-149
DYNLL1	0.463	0								ILF2	0.255	3.05e-205
PSMD12	0.46	0								YWHAZ	0.594	3.51e-240
PSMB4	0.449	0								PPP2CB	0.31	4.75e-208
CD79A	0.439	0								CBL	0.264	5.87e-216
PLAU	0.437	0								IFIT1	0.272	8.66e-148
PGAM1	0.434	0
POLR2F	0.432	0
PSMA1	0.425	0
IRF7	0.421	0
IL13RA1	0.416	0
PSMA3	0.405	0
PSMD2	0.392	0
PSMB7	0.387	0
RELA	0.378	0
TLR2	0.357	0
EIF4A3	0.354	0
DAB2IP	0.353	0
PSMD3	0.351	0
UBE2A	0.345	0
PSMD11	0.34	0
HERC5	0.337	0
PSMD13	0.328	0
POLR1D	0.325	0
POLR1C	0.32	0
SAR1B	0.319	0
PTPN11	0.313	0
CTNNB1	0.31	0
PSMC6	0.301	0
TICAM1	0.278	0
PRDX4	0.27	0
EIF4G1	0.264	0
PPP2CB	0.263	0
AP1S2	0.261	0
POLR2H	0.26	0
USP18	0.259	0
PSMD14	0.251	0
RHOA	0.312	1.02e-91
EIF4A2	0.324	6.79e-64
CTSS	0.495	1.13e-230
PSMA4	0.309	1.26e-290
PRKAR1A	0.355	1.57e-179
CD200	0.3	1.68e-299
PSMB1	0.256	1.89e-186
PSMC5	0.327	2.06e-267
RAP1B	0.286	2.31e-141
ITGB1	0.479	2.87e-218
STAT3	0.382	3.15e-284
HSP90B1	0.435	4.52e-131
ICAM2	0.314	5.03e-278
TNFRSF1A	0.312	6.57e-254
TAP1	0.296	9.5e-254

## Sheet: Glomeruli
Table S6. Immune DEGs gRECs
WT_up regulated					WT_down regulated					4KO_up regulated					4KO_down regulated
feature	logFC	padj			feature	logFC	padj			feature	logFC	padj			feature	logFC	padj
CXCL2	2529	0			TXNIP	-1993	0			CXCL2	3375	0			TXNIP	-2104	0
ISG15	2212	0			PTPRB	-1385	0			FOS	2615	0			PTPRB	-1589	0
FOS	2171	0			FABP5	-1342	0			ISG15	2314	0			APP	-1341	0
HSP90AB1	1997	0			CFD	-1287	0			HBEGF	2304	0			FABP5	-1059	0
EIF4A1	1936	0			APP	-1278	0			UBB	2116	0			YWHAB	-1023	0
UBB	1895	0			CD34	-1122	0			IER3	2013	0			ITGB1	-0.912	0
TUBB4B	1866	0			RASAL2	-1057	0			EIF4A1	1850	0			IL33	-0.889	0
TNFAIP3	1692	0			SLC44A2	-0.927	0			TUBB4B	1793	0			PSAP	-0.885	0
IER3	1652	0			STAT5B	-0.311	1.28e-67			HSP90AB1	1775	0			CD34	-0.836	0
CTSV	1648	0			RNF115	-0.294	1.74e-54			PLAUR	1694	0			CANX	-0.829	0
NFKBIA	1606	0			IKBKG	-0.278	1.82e-67			UBC	1580	0			SLC44A2	-0.78	0
TLR4	1590	0			LAMP1	-0.262	2.08e-25			TNFAIP3	1553	0			TEK	-0.77	0
PLAUR	1569	0			ANO6	-0.275	2.52e-33			EIF4A2	1459	0			B2M	-0.335	0
SDCBP	1560	0			RAPGEF4	-0.36	4.11e-45			TUBB	1375	0			EEA1	-0.263	1.12e-52
CD40	1498	0			TEK	-0.359	4.18e-41			NFKBIA	1342	0			PSMC5	-0.3	1.26e-68
PNP	1495	0			SPTAN1	-0.37	4.33e-72			PTPN1	1332	0			CD200	-0.279	1.3e-42
HBEGF	1292	0			AP2A2	-0.311	4.61e-49			SDCBP	1292	0			PSMC3	-0.318	1.37e-75
SQSTM1	1199	0			IRF2	-0.324	4.97e-74			PELI1	1176	0			ACTB	-0.394	2.2e-79
ICAM1	1172	0			PSMB9	-0.336	5.01e-46			WSB1	1119	0			STING1	-0.255	2.31e-42
IRF1	1135	0			FUCA2	-0.416	5.16e-75			DUSP5	1088	0			CAPZA2	-0.256	2.35e-34
TUBB	1070	0			PSMB8	-0.314	5.97e-38			RAP1B	1076	0			PDIA3	-0.39	2.35e-76
PSMD7	1050	0			IL33	-0.514	7.24e-76			ICAM1	1054	0			IL15	-0.28	3.22e-79
DUSP5	1037	0			CST3	-0.35	9.16e-44			DDX3X	1032	0			ARPC3	-0.376	3.28e-77
VCP	1021	0			SIPA1	-0.436	1.14e-138			IRF1	1029	0			SPTAN1	-0.306	4.52e-81
PSMA2	0.982	0			AKAP9	-0.561	1.3e-106			NFKBIE	0.981	0			AP2B1	-0.252	5.46e-81
UBC	0.959	0			RASGRF2	-0.345	1.68e-162			RNF19A	0.954	0			LAMP2	-0.26	8.17e-31
PGM2	0.858	0			CPNE3	-0.54	1.78e-130			PNP	0.902	0			PSMD7	-0.278	9.1e-63
PSMA6	0.258	1e-23			SLA-DOA	-0.407	2.07e-178			RNF19B	0.891	0			SLA-DMA	-0.265	9.72e-58
PSMC1	0.322	1.03e-85			JUP	-0.461	2.09e-154			DYNLL1	0.873	0			CD36	-0.375	1.14e-242
PGAM1	0.359	1.04e-95			SLA-DMA	-0.475	2.4e-190			POLR2K	0.811	0			CFD	-0.567	1.17e-135
CALM1	0.265	1.05e-64			CTSF	-0.354	2.87e-167			MAPKAPK2	0.73	0			CD93	-0.253	1.24e-181
SRP14	0.376	1.34e-78			IL15	-0.437	4.49e-159			EIF4E	0.688	0			ANO6	-0.629	1.29e-205
STAT3	0.416	1.43e-75			RAPGEF2	-0.4	5.35e-112			MAP3K8	0.665	0			RASAL2	-0.445	1.85e-100
CLEC2B	0.349	1.45e-48			SLA-DQB1	-0.324	6.01e-108			UBE2A	0.638	0			DDOST	-0.353	1.98e-109
TNFRSF1A	0.288	1.47e-47			GRK2	-0.406	6.19e-120			LCK	0.604	0			LAMTOR1	-0.265	2.05e-105
RAP1B	0.472	1.47e-73			SLPI	-0.685	6.71e-138			JAK2	0.597	0			PSMA6	-0.576	2.07e-183
RHOA	0.573	1.48e-87			SLA-DMB	-0.62	6.81e-229			GLA	0.59	0			CPNE3	-0.528	2.09e-194
ITGB1	0.466	1.53e-51			IRF3	-0.369	9.36e-168			NFKBIB	0.589	0			ARPC4	-0.325	2.72e-118
GRB2	0.304	1.67e-60								IL4R	0.559	0			CTSB	-0.342	3.03e-147
POLR1D	0.273	1.86e-48								RELB	0.474	0			PSMB1	-0.39	3.22e-175
IRF7	0.254	2.22e-91								PGRMC1	0.272	1.86e-85			AKAP9	-0.779	3.28e-268
UBE2L6	0.288	2.38e-87								RHOA	0.301	1.99e-26			LAMP1	-0.524	3.75e-158
DNAJC3	0.345	2.83e-58								RPS6KA3	0.32	3.64e-90			GRN	-0.485	4.21e-123
RELA	0.386	3.11e-72								EEF2	0.334	4.07e-19			PSMB9	-0.411	5.72e-178
PRKAR1A	0.476	3.37e-64								RELA	0.277	4.36e-76			PSMA4	-0.324	5.77e-107
EIF4A2	0.57	3.49e-80								RBBP6	0.305	5.97e-93			NOS3	-0.426	6.01e-100
PSMB1	0.286	3.79e-41								PSMA2	0.327	8.76e-88			FUCA2	-0.413	6.48e-153
POLR2F	0.349	4.3e-55								ACTG1	0.313	8.91e-19			JUP	-0.324	6.52e-105
PPP2CB	0.361	4.58e-99								PIP5K1A	0.45	1.02e-221			PDAP1	-0.297	6.57e-130
MYLIP	0.354	4.67e-81								YWHAZ	0.513	1.1e-105			MIF	-0.576	8.33e-171
SUMO1	0.266	4.7e-49								CTSV	0.541	1.1e-126			CST3	-0.57	9.29e-180
OSMR	0.305	4.81e-90								SUMO1	0.455	1.19e-189
HSP90B1	0.529	4.99e-67								TLR4	0.477	1.6e-259
RBBP6	0.251	7.11e-45								PSMD12	0.423	1.64e-171
PSMC5	0.381	7.14e-63								CLEC2B	0.847	1.69e-302
CTNNB1	0.251	7.25e-45								CALR	0.685	1.73e-158
KPNB1	0.29	7.71e-41								MAP3K14	0.379	1.73e-213
EEF2	0.441	7.97e-45								POLR1D	0.645	2.49e-299
CD63	0.365	9.96e-34								CD14	0.302	2.58e-172
POLR2K	0.888	1.02e-270								SLA-DQB1	0.718	3.23e-190
ILF2	0.555	1.05e-185								ACTR3	0.522	3.59e-228
PSMD11	0.542	1.13e-160								ADGRE5	0.309	4.04e-107
WSB1	0.612	1.32e-107								SEC24A	0.348	4.23e-212
PTPN1	0.456	1.32e-128								CBL	0.369	4.3e-178
PTPN2	0.454	1.49e-161								B4GALT1	0.296	4.44e-117
UBE2A	0.374	1.56e-132								KIT	0.357	4.54e-153
KIT	0.796	1.83e-256								PSMD8	0.288	4.63e-106
CCT8	0.811	1.92e-306								ILF2	0.258	5.3e-111
DHX9	0.945	2.29e-280								SQSTM1	0.649	5.58e-250
PSME2	0.572	2.38e-143								CALM1	0.346	5.86e-119
PSMB4	0.651	2.49e-189								KPNB1	0.445	6.38e-125
MAP3K8	0.562	2.49e-218								MYLIP	0.529	6.49e-258
PSMD13	0.528	2.52e-156								GRB2	0.508	6.58e-203
RAB10	0.491	2.57e-123								DHX9	0.727	7.57e-276
PSMA1	0.717	2.7e-230								CD40	0.286	8.07e-114
NFKBIB	0.708	2.71e-290								PPP2CB	0.358	8.11e-165
PSMC6	0.478	2.84e-139
PSMD3	0.549	3.01e-163
RELB	0.618	3.3e-253
TICAM1	0.406	3.48e-160
CALR	0.67	3.76e-115
OLR1	0.408	4.03e-112
PSMD14	0.424	4.17e-161
VCAM1	0.84	4.19e-253
PSMD8	0.821	4.22e-279
NFKBIE	0.413	4.24e-167
PSMB7	0.554	4.3e-169
ACTR3	0.592	4.62e-167
PSMC2	0.352	4.73e-115
CD79A	0.426	4.76e-179
DDX3X	0.837	5.01e-190
DEGS1	0.615	5.49e-243
PELI1	0.569	5.71e-134
PSMA3	0.632	5.84e-165
IL6ST	0.824	6.36e-223
RNF19B	0.661	6.46e-266
S100A11	0.794	6.49e-159
DYNLL1	0.69	6.89e-154
ICAM2	0.549	7.03e-112
CTSS	0.814	7.22e-187
YWHAZ	0.669	7.47e-133
PSMA4	0.462	7.54e-100
EIF4A3	0.327	7.99e-106
PSMD2	0.502	8.08e-136
SAR1B	0.334	8.13e-107
EIF4E	0.493	8.33e-149
TLR2	0.398	8.5e-160
IL4R	0.75	8.55e-298
PSMD12	0.708	8.57e-223
POLR1C	0.334	9.59e-126

## Sheet: Medulla
Table S6. Immune DEGs mRECs
WT_up regulated					WT_down regulated					4KO_up regulated					4KO_down regulated
feature	logFC	padj			feature	logFC	padj			feature	logFC	padj			feature	logFC	padj
PSMD14	0.317	1.01e-80			CRLF1	-0.35	1.06e-17			PSMB9	0.269	1.05e-37			CXCL2	-3029	0
TNFRSF1A	0.29	1.12e-10			WSB1	-0.79	1.07e-68			ACTG1	0.735	1.13e-82			RNF19A	-0.329	1.02e-29
MIF	0.672	1.14e-66			STAT1	-0.468	1.08e-21			DEGS1	0.298	1.27e-29			TUBB4B	-0.642	1.21e-79
PSMB4	0.553	1.16e-82			PTPRB	-0.761	1.08e-67			GRN	0.337	1.76e-22			STAT3	-0.284	1.43e-17
PRKAR1A	0.26	1.17e-10			ICAM1	-0.812	1.2e-59			CD93	0.6	1.8e-77			DYNLL1	-0.339	1.43e-33
PGM2	0.656	1.19e-73			RAPGEF2	-0.3	1.3e-15			CALR	0.296	2.29e-19			PTPN1	-0.502	1.76e-51
RASGEF1A	0.469	1.24e-90			DUSP5	-0.286	1.5e-10			CST3	0.431	2.89e-46			DDX3X	-0.579	1.77e-77
YPEL5	0.347	1.26e-45			GLA	-0.298	1.96e-17			PSMB8	0.298	2.98e-36			CD36	-0.269	1.83e-17
PSMB8	0.618	1.3e-69			CTSC	-1152	2e-98			B2M	0.365	5.68e-71			NF1	-0.253	2.28e-25
STAT5A	0.346	1.34e-54			CALM1	-0.567	2.09e-66			ITGB1	0.261	6.63e-20			PELI1	-0.403	2.48e-32
KPNB1	0.299	1.36e-11			DNM3	-0.284	2.17e-11			PGRMC1	0.254	7.61e-20			TXNIP	-0.563	2.49e-77
YWHAZ	0.329	1.36e-14			LCK	-0.265	2.19e-19			PDGFA	0.273	1.8e-122			MYLIP	-0.312	2.53e-41
IL6ST	0.548	1.44e-24			SLC44A2	-0.302	2.48e-13			CD63	0.864	4.3e-158			EP300	-0.251	2.82e-25
PDGFA	0.258	1.45e-72			CD36	-0.613	2.65e-51								PNP	-0.575	2.84e-57
ACTR3	0.354	1.49e-18			HBEGF	-0.68	2.87e-38								TUBB	-0.505	2.84e-57
POLR2K	0.56	1.5e-31			ANXA2	-0.335	2.89e-16								CFD	-0.254	2.85e-27
ARPC3	0.451	1.5e-60			TEK	-0.911	2.9e-71								ANO6	-0.405	2.89e-34
EIF4A1	0.307	0.000153			SLA-DMA	-0.304	2.92e-20								MAP3K8	-0.369	2.93e-41
RELB	0.352	1.76e-42			PPP2CB	-0.27	3.29e-10								WSB1	-0.463	2.98e-47
RASA1	0.323	1.81e-36			TXNIP	-1292	3.63e-94								HBEGF	-0.591	3.29e-62
PSMD13	0.28	1.85e-29			RNF19A	-0.461	4.34e-20								RASAL2	-0.457	3.57e-51
PSMD11	0.468	1.85e-79			PSAP	-0.354	4.37e-16								RBBP6	-0.41	3.67e-42
PSMA1	0.438	1.9e-69			DDX3X	-0.533	4.42e-49								IRF1	-0.574	4.19e-89
CD79A	0.332	1.92e-58			ACTB	-0.999	4.65e-83								CTSS	-0.258	4.4e-16
PSMA3	0.623	2.02e-68			RPS6KA3	-0.341	4.74e-15								FOS	-0.746	4.55e-65
TUBB	0.578	2.27e-28			RBBP6	-0.894	4.77e-69								TEK	-0.398	4.93e-35
ILF2	0.528	2.3e-65			SPTAN1	-0.458	5.09e-28								TLR4	-0.503	5.04e-59
VAT1	0.438	2.36e-49			SLA-DQB1	-0.947	5.51e-79								JAK2	-0.382	5.44e-36
OLR1	0.345	2.5e-79			SLA-DMB	-0.357	5.61e-28								RAPGEF4	-0.261	5.85e-21
HSP90AB1	0.631	2.52e-43			JUP	-0.259	5.93e-13								CLEC2B	-0.257	7.73e-19
PTPN2	0.438	2.99e-52			RASAL2	-0.997	5.99e-88								CTSC	-0.296	8.22e-21
POLR2F	0.39	3.01e-32			PELI1	-0.361	6.02e-14								VCAM1	-0.253	8.45e-09
NPEPPS	0.289	3.03e-38			NFKBIA	-0.373	6.18e-20								NFKBIE	-0.351	8.79e-38
ARPC4	0.307	3.1e-29			PPP2R5A	-0.418	6.38e-20								NFKBIA	-1333	1.51e-280
PSMC1	0.375	3.13e-86			RNF19B	-0.891	6.99e-61								UBC	-0.88	1.55e-202
PSMD2	0.412	3.18e-56			SLA-DOA	-0.279	7.07e-19								RNF19B	-0.845	2.21e-137
SDCBP	0.593	3.24e-29			IRF1	-0.735	7.3e-46								TNFAIP3	-1070	2.21e-203
CD47	0.536	3.42e-28			PRKCE	-0.476	8e-38								ICAM1	-0.88	2.26e-132
PSMD3	0.327	3.48e-31			CD34	-0.767	8.22e-57								UBB	-0.796	3.18e-200
HSP90B1	0.354	3.98e-11			APP	-0.413	9.36e-19								PTPRB	-0.937	4.05e-168
CAPZA2	0.517	4.01e-40			FOS	-1811	1.38e-154								IL6	-1291	4.14e-118
PSMD12	0.43	4.01e-51			UBC	-1151	1.38e-163								IER3	-0.793	5.35e-125
SRP14	0.549	4.02e-72			CXCL2	-2241	1.79e-198								FABP5	-1006	6.54e-130
ICAM2	0.404	4.4e-57			FABP5	-2801	4.51e-277
CD63	0.983	4.47e-87
EIF4A2	0.496	4.64e-17
CLEC2B	0.335	4.7e-07
MYO10	0.272	4.82e-24
VCP	0.507	4.92e-37
TSPAN14	0.291	4.93e-22
PRDX4	0.278	4.96e-60
HERC5	0.48	4.97e-76
PSMC6	0.398	5.1e-50
PSMC5	0.34	5.21e-37
PSMB7	0.332	5.33e-47
PLAUR	0.879	5.33e-86
MAP2K2	0.359	5.44e-37
TAP1	0.505	5.47e-45
RAB10	0.572	5.5e-77
RAB18	0.344	5.7e-28
PSMB9	0.57	5.7e-82
UBE2L6	0.541	5.7e-82
PDAP1	0.41	5.89e-48
RHOA	0.426	6.04e-27
PSMD8	0.395	6.06e-43
ITGB1	0.492	6.1e-23
NFKBIB	0.391	6.18e-25
KIT	0.577	6.24e-88
CCT8	0.542	6.27e-63
B2M	0.414	6.33e-60
CTNNB1	0.263	6.44e-15
IRF7	0.275	6.62e-23
DYNLT1	0.277	6.84e-44
PNP	0.413	7.11e-47
YWHAB	0.56	7.66e-57
TRAF2	0.276	7.68e-29
CTSV	0.312	8.63e-09
AP1S1	0.269	8.97e-65
PSMC3	0.287	9.42e-29
PSMC2	0.286	9.55e-54
IFNGR1	0.347	9.59e-53
PSMA6	0.796	1.48e-155
CD200	1175	1.57e-174
S100A11	1130	1.57e-174
PSME2	1141	2.48e-214
ISG15	1710	2.52e-185
PSMB1	0.582	2.54e-105
CD40	1001	2.98e-130
PSMA2	0.847	3.2e-113
USP18	0.532	3.56e-121
PSMA4	0.522	4.1e-102
IFIT1	0.831	4.69e-127
VCAM1	2522	5.87e-297
PSMD7	0.816	6.66e-149
DEGS1	0.65	7.48e-128
