# Supplementary material for: Reduced endothelial activation upon human blood perfusion of pig kidney xenografts lacking MHC class I and three xenoantigens
Source: Research Square preprint supplement (doi:10.21203/rs.3.rs-1146675/v1), 2022-01-05
Supplement: Supplementary file 5 [file 87378a843b0f052ec19982a0.xlsx]

## Sheet: Cortex
Table S5: DEGs in cRECs
WT_up regulated				WT_down regulated				4KO_up regulated				4KO_down regulated
feature	logFC	padj		feature	logFC	padj		feature	logFC	padj		feature	logFC	padj
CCL2	3538	0		FABP5	-3101	0		MT-ATP6	3084	0		TXNIP	-2890	0
SERPINE1	3289	0		TXNIP	-2952	0		ND1	3023	0		CLEC3B	-1781	0
RNF121	2995	0		IGFBP5	-2373	0		PHLDA2	2852	0		PLVAP	-1735	0
CLDN5	2790	0		RAMP2	-1790	0		MT-COX1	2817	0		IGFBP5	-1653	0
ND1	2750	0		CLEC3B	-1777	0		CXCL2	2460	0		TGFBR2	-1606	0
TIMP1	2715	0		PLVAP	-1705	0		FOS	2270	0		FLT1	-1605	0
PLAT	2664	0		EMCN	-1694	0		ISG15	2253	0		DNASE1L3	-1603	0
CXCL2	2605	0		TMEM204	-1692	0		UBB	2137	0		EGFL7	-1548	0
MT-COX1	2525	0		EGFL7	-1675	0		MT-CYTB	2101	0		KDR	-1509	0
MT-ATP6	2425	0		ENSSSCG00000016548	-1606	0		ENSSSCG00000029160	2086	0		FABP5	-1499	0
PHLDA2	2422	0		SLC9A3R2	-1582	0		PLAT	2043	0		CLEC14A	-1351	0
ISG15	2216	0		KLF2	-1532	0		PPP1R15A	2019	0		TEK	-1272	0
ATF4	2198	0		DNASE1L3	-1499	0		ATF4	1995	0		NRP1	-1263	0
SOD2	2197	0		TIMP3	-1490	0		MT-COX3	1953	0		HSPG2	-1249	0
ENSSSCG00000030300	2193	0		CYYR1	-1438	0		EMP1	1937	0		ENSSSCG00000032599	-1149	0
ENSSSCG00000014351	2121	0		EPAS1	-1403	0		H2AFZ	1925	0		PECAM1	-1133	0
HSP90AB1	2102	0		CD34	-1391	0		BIRC3	1916	0		LIFR	-1125	0
RDH10	2074	0		LIMCH1	-1361	0		TIMP1	1914	0		EMCN	-1111	0
EIF4A1	2066	0		SPTBN1	-1333	0		IFRD1	1907	0		CYYR1	-1107	0
SLC38A2	2055	0		LIFR	-1331	0		SAT1	1899	0		CLIC5	-1088	0
ENSSSCG00000032591	1988	0		TGFBR2	-1323	0		MT-ND3	1869	0		TMEM204	-1079	0
MT-CYTB	1985	0		NRP1	-1319	0		ZFP36	1763	0		APP	-1042	0
ENSSSCG00000029160	1983	0		MMRN2	-1305	0		ENSSSCG00000014540	1758	0		ADGRL4	-1018	0
MT-COX3	1938	0		KANK3	-1299	0		LMNA	1749	0		HYAL2	-0.982	0
EIF1	1926	0		ITM2B	-1261	0		SOCS3	1743	0		CD34	-0.973	0
NPM1	1921	0		CFD	-1258	0		SLC38A2	1703	0		PTPRB	-0.935	0
EMP1	1900	0		ENSSSCG00000040410	-1236	0		ATF3	1679	0		EPAS1	-0.933	0
NFKBIA	1872	0		RGCC	-1226	0		EIF1	1606	0		SLC9A3R2	-0.923	0
GAPDH	1868	0		TEK	-1190	0		HSP90AB1	1586	0		RGCC	-0.908	0
PPP1R15A	1816	0		TNS2	-1166	0		SERTAD1	1579	0		SEC62	-0.882	0
ENO1	1816	0		CCL14	-1147	0		MT-ND2	1571	0		PLPP1	-0.862	0
SAT1	1803	0		MYO1C	-1144	0		ENSSSCG00000017202	1542	0		ENSSSCG00000001455	-0.789	0
AKAP12	1767	0		CRIP2	-1134	0		GADD45A	1539	0		ENSSSCG00000016548	-0.786	0
ENSSSCG00000025582	1714	0		SELENOP	-1132	0		ENSSSCG00000005453	1538	0		ENSSSCG00000003839	-0.73	0
HSPA5	1691	0		RASAL2	-1120	0		VMP1	1487	0		ENSSSCG00000033262	-0.499	0
SDCBP	1679	0		CXCL12	-1114	0		EIF4A1	1468	0		B2M	-0.266	0
SEPTIN11	1671	0		CLIC5	-1113	0		GAPDH	1462	0		ENSSSCG00000034230	-0.263	1.01e-21
CTSV	1663	0		CLEC14A	-1109	0		MT-ND4	1451	0		PARK7	-0.28	1.02e-27
FOS	1653	0		ENSSSCG00000032599	-1097	0		FOSB	1448	0		SVIL	-0.304	1.03e-25
ENSSSCG00000005453	1647	0		ADGRL4	-1084	0		CYCS	1444	0		ENSSSCG00000014280	-0.258	1.03e-51
H2AFZ	1638	0		APP	-1046	0		FTL	1438	0		CRIP2	-0.414	1.04e-70
TUBA1B	1619	0		PLPP1	-1029	0		ENSSSCG00000011000	1431	0		SYT7	-0.339	1.06e-55
TM4SF1	1591	0		LDB2	-1027	0		JMJD1C	1386	0		HECTD1	-0.266	1.07e-16
ENSSSCG00000016737	1589	0		PECAM1	-1020	0		ARL5B	1363	0		SLU7	-0.273	1.08e-26
SWAP70	1583	0		TCN2	-1009	0		CCNL1	1337	0		CASKIN2	-0.27	1.08e-28
UBB	1583	0		SYNE2	-0.992	0		HSPH1	1317	0		RBM5	-0.257	1.11e-17
ENSSSCG00000006777	1574	0		CD36	-0.988	0		HSPA5	1310	0		ISG12(A)	-0.268	1.11e-36
SOCS3	1567	0		PBX1	-0.985	0		UBC	1301	0		NUMA1	-0.297	1.11e-38
RAN	1556	0		SEC62	-0.983	0		THBS1	1287	0		HERC1	-0.266	1.12e-23
SFPQ	1538	0		SPARC	-0.98	0		HSP90AA1	1267	0		GLG1	-0.285	1.12e-43
ENSSSCG00000003079	1525	0		HSPG2	-0.977	0		HBEGF	1256	0		ENSSSCG00000023324	-0.383	1.13e-55
DDX21	1517	0		TP53I11	-0.976	0		MAFF	1251	0		ENSSSCG00000044700	-0.393	1.14e-58
HSPA8	1507	0		ENSSSCG00000012119	-0.975	0		ENSSSCG00000037245	1247	0		CCND3	-0.396	1.19e-69
MT-ND2	1503	0		GHSR	-0.945	0		TUBB4B	1231	0		RPN2	-0.312	1.2e-52
YBX3	1493	0		TSC22D1	-0.942	0		ACTG1	1225	0		MRTFB	-0.255	1.22e-29
CYCS	1491	0		ITGA1	-0.939	0		CD9	1221	0		GSE1	-0.283	1.22e-30
BIRC3	1488	0		ENSSSCG00000033734	-0.939	0		DUSP5	1220	0		AFAP1L1	-0.275	1.27e-47
NCL	1472	0		SLC44A2	-0.934	0		SDCBP	1216	0		ATP5ME	-0.354	1.29e-57
RBM3	1456	0		RUNX1T1	-0.932	0		ENSSSCG00000003079	1205	0		PLD3	-0.404	1.34e-75
PPA1	1454	0		CALCOCO2	-0.926	0		MT-COX2	1196	0		BCL2L1	-0.305	1.35e-57
TUBB4B	1445	0		ARHGAP29	-0.925	0		NFKBIA	1172	0		TRIP11	-0.311	1.36e-35
PALM2AKAP2	1416	0		ADGRF5	-0.904	0		ENSSSCG00000006395	1171	0		FGD5	-0.259	1.37e-19
PMP22	1408	0		ENSSSCG00000011859	-0.899	0		GADD45B	1169	0		ENSSSCG00000048263	-0.354	1.37e-88
CFL1	1389	0		ENSSSCG00000033189	-0.896	0		ADAMTS4	1163	0		CCND1	-0.503	1.39e-92
ENSSSCG00000004572	1388	0		LIMS2	-0.887	0		RPLP0	1160	0		DNAJC3	-0.264	1.4e-25
TNIP1	1377	0		ENSSSCG00000001341	-0.886	0		ENSSSCG00000025582	1158	0		REEP3	-0.331	1.46e-38
STPG4	1376	0		IGFBP7	-0.881	0		RPL15	1156	0		LDB2	-0.393	1.46e-60
VMP1	1376	0		MEIS2	-0.877	0		DNAJB1	1156	0		COX6A1	-0.276	1.48e-36
ENSSSCG00000006395	1357	0		SLA-DMB	-0.858	0		ARF6	1138	0		BCAM	-0.32	1.5e-35
CD40	1356	0		ECE1	-0.853	0		STPG4	1138	0		C12orf57	-0.261	1.52e-20
MAT2A	1354	0		FLT1	-0.844	0		MAT2A	1131	0		DIAPH2	-0.306	1.52e-48
LMNA	1353	0		CALML4	-0.842	0		RPL6	1126	0		EPC1	-0.371	1.53e-74
HSP90AA1	1348	0		UTRN	-0.836	0		HSPA8	1126	0		MEF2C	-0.374	1.54e-68
IER3	1332	0		ENSSSCG00000039807	-0.836	0		NUFIP2	1124	0		VPS13A	-0.298	1.59e-30
EMILIN2	1330	0		EHD4	-0.831	0		ARF4	1086	0		TMEM47	-0.384	1.6e-61
RELL1	1330	0		PREX2	-0.823	0		ENSSSCG00000033310	1084	0		MPZL1	-0.286	1.66e-48
THBS1	1325	0		TMEM88	-0.82	0		ENSSSCG00000030300	1080	0		OSBPL1A	-0.38	1.66e-71
ENSSSCG00000037245	1323	0		RDX	-0.814	0		CKS2	1070	0		ENSSSCG00000015814	-0.267	1.67e-18
FJX1	1317	0		CASKIN2	-0.808	0		IER3	1064	0		COL4A2	-0.465	1.67e-84
RPL15	1314	0		IRX3	-0.806	0		TRA2B	1060	0		LTBP1	-0.306	1.76e-31
ENSSSCG00000011000	1310	0		SOX18	-0.805	0		PPA1	1057	0		TNRC6B	-0.259	1.81e-27
HIF1A	1295	0		SLC6A6	-0.8	0		MT-ND5	1051	0		CRIM1	-0.318	1.85e-33
BZW1	1291	0		CD93	-0.799	0		ENSSSCG00000036114	1047	0		RESF1	-0.263	1.86e-17
DYNLRB1	1287	0		TIE1	-0.793	0		PNRC1	1038	0		LAMP1	-0.322	1.86e-40
FOSB	1286	0		LTBP4	-0.788	0		CFL1	1038	0		KITLG	-0.491	1.88e-81
TSPAN15	1286	0		NUCKS1	-0.785	0		TSC22D2	1037	0		PLXDC2	-0.341	1.89e-66
CASP7	1279	0		CPEB4	-0.771	0		RAC1	1037	0		CHD6	-0.256	1.93e-27
GSTO1	1277	0		CAVIN3	-0.77	0		EIF4A2	1032	0		TMCO1	-0.435	1.94e-75
SERTAD1	1271	0		SMARCA2	-0.767	0		CLEC2B	1025	0		MACF1	-0.309	2.01e-97
PLAUR	1253	0		RRAS	-0.766	0		RNF19B	1012	0		ENSSSCG00000034019	-0.265	2.04e-24
ATP1A1	1248	0		ENSSSCG00000001455	-0.758	0		OAZ1	1012	0		TSPAN18	-0.263	2.05e-72
SRSF2	1245	0		DDX17	-0.755	0		EEF1B2	0.986	0		DOCK6	-0.29	2.07e-35
ENSSSCG00000017920	1245	0		CALCRL	-0.752	0		TOP1	0.983	0		SH3BP5	-0.284	2.07e-56
ENSSSCG00000017202	1228	0		APLP2	-0.751	0		COQ10B	0.979	0		IL15	-0.346	2.08e-63
HNRNPA1	1227	0		TMSB10	-0.751	0		WSB1	0.979	0		USP8	-0.353	2.09e-67
BAZ1A	1224	0		FMNL2	-0.744	0		GPX1	0.977	0		ENSSSCG00000004081	-0.252	2.22e-27
ATF3	1223	0		MEF2C	-0.741	0		NPM1	0.966	0		CDC42BPA	-0.34	2.22e-37
TOP1	1222	0		NPR1	-0.738	0		ZFP36L1	0.965	0		TAOK2	-0.265	2.23e-21
PTPRE	1220	0		AOPEP	-0.738	0		RASSF1	0.957	0		IGFBP2	-0.275	2.28e-27
ESM1	1216	0		DNAH11	-0.733	0		BHLHE40	0.955	0		MYCBP2	-0.362	2.29e-44
RND1	1214	0		DYSF	-0.719	0		CCN1	0.952	0		TNFAIP1	-0.35	2.29e-67
PNP	1213	0		SLA-DQB1	-0.718	0		SRSF7	0.948	0		WASHC4	-0.294	2.3e-53
FBL	1212	0		MDK	-0.716	0		BAZ1A	0.946	0		ENSSSCG00000041446	-0.339	2.32e-73
CDV3	1211	0		CSRP1	-0.716	0		RPS13	0.939	0		PLXND1	-0.256	2.34e-18
GADD45B	1211	0		APLNR	-0.707	0		YBX3	0.939	0		IK	-0.303	2.34e-26
ENSSSCG00000014031	1207	0		ENSSSCG00000033262	-0.705	0		CLIC4	0.937	0		CD47	-0.307	2.34e-34
WWTR1	1204	0		PTPRB	-0.699	0		GADD45G	0.936	0		NFIA	-0.257	2.35e-37
HINT1	1196	0		HLA-DRA	-0.694	0		TPM4	0.931	0		TUT4	-0.335	2.36e-45
RPL21	1182	0		BCAM	-0.687	0		SUPT4H1	0.928	0		KTN1	-0.292	2.58e-33
SLC1A5	1177	0		TLE5	-0.686	0		IRF1	0.923	0		CDH5	-0.3	2.61e-42
STC1	1167	0		ENSSSCG00000038991	-0.686	0		RPL7	0.923	0		RAPGEF4	-0.383	2.65e-51
DDX3X	1166	0		BAZ2B	-0.675	0		RND1	0.916	0		ZBTB22	-0.34	2.75e-52
MT-COX2	1160	0		NOTCH1	-0.675	0		RPL10	0.913	0		SLCO2A1	-0.3	2.79e-26
TMED5	1159	0		KDR	-0.666	0		TXNRD1	0.909	0		U2SURP	-0.469	2.82e-80
C15orf48	1152	0		ENSSSCG00000001396	-0.662	0		CDKN1A	0.907	0		BOD1L1	-0.347	2.85e-50
PDE4B	1150	0		HDAC7	-0.659	0		NCL	0.904	0		GRN	-0.266	2.89e-24
NOP56	1150	0		LIMA1	-0.656	0		CDV3	0.897	0		IRX3	-0.358	2.89e-58
NOLC1	1144	0		AKAP9	-0.651	0		ICAM1	0.895	0		SLC12A7	-0.31	2.97e-42
SMURF2	1143	0		ARL15	-0.651	0		ENSSSCG00000039071	0.892	0		LYST	-0.381	3.12e-68
RNF19B	1141	0		SPRY1	-0.65	0		CCND2	0.881	0		ENSSSCG00000004082	-0.411	3.13e-62
SLC25A6	1135	0		DOCK6	-0.648	0		GRASP	0.88	0		APLNR	-0.259	3.14e-78
TNFAIP3	1125	0		PLD3	-0.642	0		NFKBIZ	0.878	0		ARHGEF15	-0.378	3.18e-64
TUBB	1123	0		ELK3	-0.636	0		EGR1	0.877	0		B3GNT3	-0.36	3.18e-96
ADAMTS4	1119	0		NFIB	-0.632	0		PLAUR	0.87	0		NKTR	-0.275	3.26e-22
NME2	1118	0		PER1	-0.631	0		NME2	0.867	0		MBTPS1	-0.301	3.28e-48
ZFP36	1112	0		REEP3	-0.625	0		RPS15A	0.864	0		RAPGEF3	-0.25	3.29e-22
SERBP1	1112	0		PLXND1	-0.623	0		ENSSSCG00000004307	0.862	0		VPS36	-0.254	3.3e-17
ZFAND5	1110	0		ATP2B4	-0.619	0		GGCX	0.86	0		KMT2C	-0.309	3.31e-26
BST2	1110	0		CCND1	-0.615	0		TPT1	0.859	0		ANO6	-0.282	3.31e-30
RAC1	1105	0		PCMTD1	-0.615	0		ANGPTL4	0.852	0		TRIB2	-0.395	3.31e-68
MT-ND3	1105	0		CYBRD1	-0.61	0		RPS12	0.845	0		SF3B1	-0.292	3.32e-77
TUBB6	1096	0		SLA-DMA	-0.607	0		CCL2	0.843	0		SH2D3C	-0.275	3.39e-21
PRDX1	1096	0		NCOA7	-0.606	0		TNFAIP3	0.836	0		WWC3	-0.251	3.44e-15
ENSSSCG00000040857	1096	0		PLXDC2	-0.603	0		ENSSSCG00000035293	0.827	0		CLSTN1	-0.343	3.54e-71
IRF1	1090	0		LYST	-0.602	0		TUBB6	0.814	0		ENSSSCG00000017177	-0.37	3.56e-87
CEBPB	1089	0		MCF2L	-0.602	0		DNAJB4	0.814	0		PER1	-0.486	3.62e-97
ICAM1	1088	0		PDE2A	-0.601	0		IER5	0.81	0		ENSSSCG00000033720	-0.281	3.81e-29
EEF1B2	1083	0		PLCB1	-0.595	0		RPL32	0.804	0		BMPR2	-0.275	3.83e-22
ATP1B1	1081	0		SGK1	-0.594	0		TAF1D	0.802	0		CNN3	-0.266	3.86e-27
CCN1	1079	0		ARAP3	-0.592	0		POLR2K	0.802	0		SBSPON	-0.35	3.94e-59
ENSSSCG00000026430	1075	0		KMT2C	-0.591	0		ENSSSCG00000034049	0.8	0		STEAP3	-0.317	4e-77
SLC3A2	1074	0		IL15	-0.59	0		EMILIN2	0.799	0		CD93	-0.25	4.05e-25
ENSSSCG00000009633	1072	0		RPS28	-0.584	0		WWTR1	0.797	0		PEAK1	-0.257	4.09e-32
HBEGF	1071	0		SLA-DOA	-0.583	0		ENSSSCG00000036296	0.793	0		FRYL	-0.415	4.12e-92
ARF4	1066	0		RAMP3	-0.583	0		CSRNP1	0.788	0		RASGRF2	-0.276	4.17e-59
DDX5	1061	0		NOSTRIN	-0.579	0		GLS	0.787	0		TLN1	-0.293	4.22e-26
RPLP0	1053	0		SERPINB9	-0.578	0		ENSSSCG00000014361	0.786	0		UTRN	-0.287	4.26e-61
NARS1	1048	0		CIITA	-0.577	0		SWAP70	0.785	0		ATP2B4	-0.355	4.28e-51
HK1	1048	0		GSE1	-0.573	0		EIF4E	0.779	0		ROBO4	-0.276	4.29e-35
RGS16	1042	0		ESAM	-0.572	0		TUBB	0.777	0		LRP11	-0.304	4.37e-40
PGM2	1038	0		ENSSSCG00000004081	-0.569	0		RTN4	0.776	0		ENSSSCG00000039807	-0.255	4.41e-20
ALYREF	1035	0		TUT4	-0.569	0		SOD2	0.772	0		CAVIN3	-0.373	4.43e-62
SNAPC1	1027	0		ENSSSCG00000016263	-0.565	0		RPS3A	0.768	0		TPR	-0.376	4.53e-47
RPL28	1026	0		EPB41L4A	-0.564	0		PNP	0.767	0		CIR1	-0.307	4.53e-47
CHMP4B	1026	0		ARHGEF15	-0.562	0		PTPN1	0.763	0		PCMTD1	-0.449	4.55e-75
ENSSSCG00000003839	1025	0		BIRC6	-0.559	0		BAG3	0.762	0		MPPED2	-0.312	4.56e-45
PPP1R14B	1023	0		ENSSSCG00000004082	-0.552	0		NFKBIB	0.761	0		HLX	-0.414	4.59e-80
HES1	1020	0		ABCG2	-0.55	0		RNF122	0.76	0		KIAA1109	-0.259	4.72e-53
ENSSSCG00000033310	1013	0		PTN	-0.549	0		ENSSSCG00000022176	0.756	0		TSPAN9	-0.253	4.79e-37
GNG10	1011	0		SBSPON	-0.546	0		SOX17	0.754	0		EPB41L4A	-0.348	4.81e-47
IFRD1	1008	0		ACVRL1	-0.54	0		UBE2A	0.754	0		SPCS2	-0.296	4.85e-36
ENSSSCG00000039071	1001	0		FGD5	-0.536	0		ENSSSCG00000033697	0.752	0		SMARCA2	-0.329	4.85e-38
DHX9	0.999	0		ENSSSCG00000023324	-0.536	0		SLC25A25	0.751	0		NRP2	-0.331	4.89e-39
IER5	0.995	0		ENSSSCG00000015880	-0.532	0		AZIN1	0.749	0		RABAC1	-0.327	4.95e-44
RPS6	0.986	0		N4BP1	-0.531	0		ENSSSCG00000012427	0.742	0		SMC1A	-0.338	5.02e-40
GADD45A	0.985	0		C12orf57	-0.531	0		ENSSSCG00000011952	0.739	0		CAVIN2	-0.401	5.06e-57
SEC61B	0.984	0		TTC3	-0.53	0		TIPARP	0.738	0		FKBP5	-0.426	5.08e-75
RBM8A	0.984	0		SETX	-0.527	0		RPL7A	0.736	0		IQGAP1	-0.349	5.09e-44
SLC41A1	0.983	0		MTCH1	-0.522	0		CLK1	0.734	0		ARAP3	-0.393	5.1e-61
ENSSSCG00000015712	0.982	0		RAPGEF2	-0.521	0		PELI1	0.732	0		ENSSSCG00000006418	-0.482	5.11e-88
ADGRG1	0.975	0		NFIA	-0.519	0		HNRNPA0	0.73	0		CPNE3	-0.353	5.15e-44
CCNYL1	0.974	0		ABLIM1	-0.515	0		REL	0.73	0		ENSSSCG00000036280	-0.326	5.52e-58
SELENOS	0.971	0		ENSSSCG00000015645	-0.512	0		KLF10	0.728	0		ENSSSCG00000044051	-0.345	5.57e-42
ENSSSCG00000010203	0.971	0		B3GNT3	-0.504	0		ENSSSCG00000029830	0.727	0		ARHGAP28	-0.251	5.59e-34
RPL6	0.967	0		AKT3	-0.504	0		DDX21	0.725	0		CMTM8	-0.277	5.61e-24
SRSF7	0.967	0		ALCAM	-0.502	0		PDE4B	0.723	0		DICER1	-0.255	5.63e-28
RASSF1	0.965	0		RBMS3	-0.501	0		RPL28	0.721	0		LRRC70	-0.317	5.78e-34
CDC42EP2	0.962	0		ITM2A	-0.501	0		ENSSSCG00000014569	0.717	0		ACVRL1	-0.325	5.78e-51
ENSSSCG00000004307	0.957	0		IQGAP1	-0.501	0		PTMA	0.711	0		ENSSSCG00000015853	-0.331	5.96e-67
SLC25A3	0.957	0		NPDC1	-0.496	0		TSPAN6	0.711	0		PTPRG	-0.45	6.07e-76
TPT1	0.957	0		MPZL1	-0.495	0		ENSSSCG00000033190	0.711	0		ID1	-0.325	6.16e-71
SYNCRIP	0.956	0		PEAK1	-0.495	0		CRYAB	0.71	0		TNRC18	-0.253	6.19e-35
MAP2K3	0.955	0		AFAP1L1	-0.494	0		BTG3	0.708	0		CEP295	-0.267	6.26e-34
DUSP5	0.954	0		ZBTB38	-0.488	0		ETV3	0.706	0		COMMD6	-0.401	6.31e-75
MAFF	0.952	0		CCND3	-0.488	0		S100A6	0.704	0		NFIB	-0.275	6.51e-35
RANBP1	0.945	0		SERF2	-0.487	0		NSD3	0.698	0		FER	-0.264	6.63e-34
HNRNPH1	0.941	0		ENSSSCG00000033720	-0.487	0		CDC42EP2	0.697	0		NOTCH4	-0.335	6.72e-40
EIF4EBP1	0.941	0		CYP20A1	-0.479	0		ENSSSCG00000000107	0.694	0		DDX17	-0.344	6.82e-59
ENSSSCG00000001930	0.933	0		CLSTN1	-0.477	0		PTP4A2	0.692	0		HP1BP3	-0.381	6.85e-63
REXO2	0.929	0		RESF1	-0.477	0		ARPC2	0.689	0		CANX	-0.313	6.96e-36
PKIG	0.928	0		EMID1	-0.475	0		CAVIN1	0.687	0		NSD1	-0.292	6.98e-50
IL6ST	0.927	0		INPP4B	-0.475	0		ENSSSCG00000030849	0.686	0		ADAM10	-0.514	6.99e-99
EIF4G2	0.923	0		HTRA1	-0.468	0		MEX3C	0.682	0		TM9SF3	-0.26	7.17e-20
POLR2K	0.919	0		CTSD	-0.466	0		SBDS	0.681	0		LMO7	-0.291	7.24e-44
PABPC1	0.918	0		NUMA1	-0.465	0		DLL4	0.679	0		ENSSSCG00000035037	-0.37	7.45e-48
CD9	0.916	0		JUP	-0.465	0		IER5L	0.675	0		FAM160A2	-0.279	7.55e-25
TLR4	0.915	0		SF3B1	-0.464	0		AMD1	0.673	0		ENSSSCG00000015645	-0.272	7.57e-32
ENSSSCG00000038359	0.915	0		ENSSSCG00000038825	-0.463	0		CASP10	0.667	0		YWHAB	-0.483	7.79e-97
PARP14	0.91	0		TNRC6B	-0.463	0		PABPC1	0.665	0		PXDN	-0.253	7.81e-38
PSMA2	0.908	0		ENSSSCG00000049158	-0.458	0		PKIG	0.661	0		MEIS2	-0.437	7.81e-72
MANF	0.907	0		ENSSSCG00000032003	-0.456	0		KPNA2	0.659	0		CISH	-0.271	7.86e-26
KPNA2	0.906	0		ZBTB16	-0.454	0		RDH10	0.653	0		MFSD6	-0.261	7.98e-30
EIF3A	0.904	0		LRRC3B	-0.451	0		MAP7D1	0.648	0		XRN1	-0.301	8e-29
GADD45G	0.903	0		CDC42EP1	-0.45	0		ETF1	0.646	0		GOLGB1	-0.367	8.05e-44
ARF6	0.9	0		TSPAN9	-0.448	0		SRSF2	0.646	0		MCC	-0.457	8.19e-89
HSPE1	0.896	0		DIPK1B	-0.443	0		ENSSSCG00000004572	0.633	0		ELK3	-0.41	8.25e-66
BRD2	0.896	0		TMEM123	-0.441	0		SLC3A2	0.631	0		CFD	-0.349	8.32e-43
RSL1D1	0.895	0		CETN3	-0.44	0		ITGA5	0.629	0		NOP53	-0.266	8.46e-22
FTL	0.892	0		MYL12A	-0.439	0		SUMO1	0.628	0		BCAP29	-0.282	8.52e-36
VCAM1	0.891	0		STARD8	-0.439	0		LCK	0.627	0		HLTF	-0.252	8.56e-21
UPP1	0.886	0		MCC	-0.435	0		HSPE1	0.627	0		PSMA6	-0.29	8.62e-29
VAPA	0.885	0		ENSSSCG00000015853	-0.435	0		CDKN1C	0.623	0		ATRX	-0.408	8.85e-54
ENSSSCG00000011676	0.878	0		KIAA1109	-0.429	0		ADM	0.622	0		MCF2L	-0.331	8.88e-72
RPL32	0.877	0		RAPGEF3	-0.428	0		RPS27A	0.618	0		ARRDC2	-0.349	9.1e-49
SYS1	0.877	0		JAM2	-0.427	0		TOPORS	0.617	0		INPP4B	-0.314	9.11e-44
CXCL10	0.876	0		FRYL	-0.419	0		ENSSSCG00000004970	0.616	0		FAM110D	-0.286	9.25e-26
NET1	0.875	0		ENSSSCG00000017177	-0.416	0		WEE1	0.615	0		COL15A1	-0.367	9.35e-83
EIF2AK2	0.869	0		SHE	-0.413	0		DYNLL1	0.614	0		PBRM1	-0.253	9.4e-35
MX1	0.868	0		NSD1	-0.411	0		RPS7	0.611	0		TLE5	-0.41	9.48e-67
GGCX	0.868	0		FER	-0.41	0		ELF2	0.61	0		VPS13C	-0.273	9.53e-45
MAP7D1	0.867	0		VSIR	-0.41	0		ENSSSCG00000014351	0.608	0		ENSSSCG00000008686	-0.291	9.6e-27
CKS2	0.867	0		ENSSSCG00000015083	-0.407	0		GJC1	0.608	0		LRRC8A	-0.331	9.61e-38
VCP	0.863	0		ENSSSCG00000026960	-0.405	0		ACTR3	0.603	0		NOX4	-0.312	9.72e-91
GLS	0.863	0		SCP2	-0.405	0		HIF1A	0.597	0		PLCB1	-0.473	9.77e-86
NAP1L1	0.859	0		F8	-0.404	0		HIVEP2	0.595	0		PIK3C2A	-0.293	9.79e-26
EEF1G	0.858	0		TSPAN4	-0.4	0		STX11	0.594	0		VWA1	-0.285	9.92e-29
EIF5B	0.858	0		YPEL3	-0.399	0		ENSSSCG00000013906	0.59	0		IGFBP7	-0.436	1.02e-171
ADM	0.856	0		STXBP3	-0.394	0		CHMP4B	0.589	0		CAPNS1	-0.481	1.03e-106
CCT5	0.852	0		HLX	-0.394	0		NABP1	0.586	0		TM4SF18	-0.625	1.04e-159
TCP1	0.851	0		SEMA3G	-0.392	0		DYRK3	0.586	0		CALCOCO2	-0.739	1.07e-223
ENSSSCG00000015730	0.851	0		LIPA	-0.392	0		ENSSSCG00000022322	0.584	0		ECE1	-0.704	1.08e-204
HNRNPA3	0.85	0		PAM	-0.389	0		TGFB1	0.58	0		HLA-DRA	-0.347	1.12e-200
TSPAN6	0.849	0		SEPTIN9	-0.389	0		ENSSSCG00000024555	0.58	0		ENSSSCG00000033189	-0.725	1.16e-240
PRMT1	0.848	0		TNRC18	-0.387	0		SLC25A5	0.58	0		KLF2	-0.56	1.18e-139
EIF6	0.848	0		PKN1	-0.386	0		SNAPC1	0.578	0		FCGRT	-0.525	1.19e-150
SDF4	0.847	0		ITGB5	-0.385	0		TRIB1	0.577	0		SELENOP	-0.534	1.26e-134
RPL3	0.846	0		TIAM1	-0.384	0		RBMX	0.572	0		SPARC	-0.591	1.3e-142
MRTO4	0.845	0		ENSSSCG00000038507	-0.375	0		ZSWIM6	0.57	0		CD81	-0.444	1.31e-167
LPGAT1	0.844	0		ENSSSCG00000014280	-0.37	0		RYBP	0.567	0		CYBRD1	-0.561	1.35e-165
SARS1	0.843	0		GNAQ	-0.366	0		PCNA	0.567	0		LIMS2	-0.595	1.39e-150
DKC1	0.843	0		COMMD6	-0.365	0		SNU13	0.563	0		ENSSSCG00000040410	-0.726	1.42e-220
OAS1	0.842	0		ARHGDIB	-0.364	0		TNFAIP8L1	0.561	0		TCN2	-0.614	1.44e-152
SEC61G	0.839	0		ARHGAP25	-0.36	0		RPS20	0.56	0		MMRN2	-0.848	1.45e-300
LAPTM4A	0.836	0		SON	-0.358	0		MORF4L2	0.559	0		APLP2	-0.674	1.56e-200
PDLIM7	0.835	0		ENSSSCG00000033010	-0.358	0		SPP1	0.556	0		SLC6A6	-0.76	1.58e-210
TPM3	0.833	0		NOX4	-0.357	0		SLC20A1	0.549	0		GALNT18	-0.865	1.62e-295
ENSSSCG00000031381	0.831	0		TMC6	-0.356	0		NOP58	0.547	0		ARHGAP29	-0.491	1.69e-169
CCT8	0.83	0		RASGRF2	-0.351	0		ENSSSCG00000006928	0.547	0		SGK1	-0.657	1.81e-217
MBD2	0.826	0		HSPA12B	-0.351	0		IRF8	0.544	0		SERPINB9	-0.459	1.83e-112
TAF1D	0.826	0		MAPK12	-0.349	0		KIAA1191	0.543	0		MYL12A	-0.519	1.9e-246
HSPH1	0.824	0		ENSSSCG00000027890	-0.345	0		GCH1	0.537	0		CIITA	-0.399	1.93e-109
GPX1	0.82	0		REX1BD	-0.343	0		JAK2	0.537	0		ITGB1	-0.561	1.95e-242
HNRNPA0	0.82	0		ENSSSCG00000028691	-0.343	0		CD3EAP	0.537	0		TP53I11	-0.499	1.98e-119
HSPA9	0.819	0		CCM2L	-0.342	0		HBP1	0.537	0		ENSSSCG00000001341	-0.562	2.33e-153
ENSSSCG00000024973	0.816	0		MPPED2	-0.341	0		NDEL1	0.537	0		AKAP9	-0.547	2.35e-112
ITGA5	0.816	0		ENSSSCG00000000905	-0.338	0		AFF4	0.535	0		STARD8	-0.479	2.37e-128
SASH1	0.814	0		CNTLN	-0.333	0		GNG10	0.534	0		KANK3	-0.583	2.42e-143
PFDN2	0.814	0		RNASEH2C	-0.329	0		CHIC2	0.533	0		NOSTRIN	-0.449	2.5e-102
EIF1B	0.812	0		PDE7B	-0.328	0		POLR1D	0.533	0		RDX	-0.661	2.68e-170
ENSSSCG00000020808	0.812	0		EPB41	-0.326	0		ATP1B1	0.532	0		SNRK	-0.573	2.7e-134
TRA2B	0.81	0		PCDH12	-0.326	0		SMURF2	0.532	0		TNS2	-0.825	2.78e-270
MX2	0.808	0		ENSSSCG00000016810	-0.325	0		DENND2C	0.53	0		DYSF	-0.533	2.8e-118
MT-ND4	0.803	0		MAN1C1	-0.323	0		PLK3	0.525	0		SON	-0.424	2.84e-251
MT1A	0.802	0		TOR4A	-0.322	0		NFKBIE	0.522	0		RAMP3	-0.828	3.13e-250
BRWD1	0.797	0		ZBTB20	-0.32	0		MSX1	0.52	0		SETX	-0.551	3.24e-118
WSB1	0.795	0		ENSSSCG00000006510	-0.32	0		SERP1	0.519	0		EFNB1	-0.914	3.36e-300
KIT	0.794	0		TMTC2	-0.32	0		ARID4A	0.517	0		LIMCH1	-0.571	3.38e-169
EIF2S2	0.785	0		FAM53B	-0.308	0		NAMPT	0.513	0		SLC8A1	-0.614	3.51e-192
NFKBIB	0.78	0		FAM210B	-0.307	0		PHACTR4	0.512	0		NUCKS1	-0.41	3.73e-112
SEMA7A	0.78	0		ENSSSCG00000009327	-0.298	0		SIGIRR	0.511	0		CALCRL	-0.471	3.8e-179
PLEKHO1	0.778	0		TMEM106A	-0.294	0		RND3	0.508	0		FMNL2	-0.626	3.88e-153
RND3	0.775	0		TMEM106B	-0.291	0		ENSSSCG00000038359	0.508	0		SPTBN1	-0.576	4.05e-232
RPS15A	0.774	0		NCALD	-0.288	0		CASP8	0.507	0		MARCKS	-0.392	4.11e-115
RPL7	0.774	0		RXRA	-0.284	0		ENSSSCG00000031893	0.507	0		ESAM	-0.536	4.2e-147
STX11	0.771	0		CORO1B	-0.272	0		RCAN1	0.506	0		TINAGL1	-0.618	4.4e-159
RPL17-C18orf32	0.769	0		ENSSSCG00000001229	-0.27	0		PRDM1	0.505	0		VWF	-0.738	4.4e-200
TOPORS	0.769	0		TNRC6C	-0.27	0		ENSSSCG00000022925	0.49	0		TIE1	-0.505	4.46e-103
ENY2	0.766	0		SEMA6D	-0.267	0		DDX23	0.489	0		SPRY1	-0.628	4.5e-170
ENSSSCG00000036114	0.763	0		TMBIM6	-0.264	0		BACH1	0.488	0		PREX2	-0.596	4.54e-135
MRPL17	0.76	0		ENSSSCG00000039926	-0.257	0		PPP2CA	0.483	0		ENSSSCG00000011859	-0.49	4.59e-112
SQSTM1	0.759	0		ZNF704	-0.256	0		ENSSSCG00000021576	0.478	0		RASAL2	-0.591	4.64e-165
PSMD7	0.758	0		TRIP11	-0.277	1.05e-84		PRNP	0.476	0		S1PR1	-0.603	4.68e-216
AMD1	0.757	0		RFC1	-0.254	1.08e-72		PPP1R14B	0.474	0		ITM2B	-0.252	4.82e-140
RACK1	0.756	0		ENSSSCG00000002259	-0.254	1.15e-57		MT-ND4L	0.467	0		TSC22D1	-0.594	4.85e-156
SBDS	0.754	0		ITSN2	-0.279	1.33e-94		ODC1	0.465	0		SYNE2	-0.761	5.46e-207
IPO5	0.754	0		ENSSSCG00000035037	-0.298	1.49e-78		TLE4	0.458	0		TMBIM6	-0.684	5.53e-292
RPL4	0.752	0		CEP295	-0.263	1.5e-77		ORAI1	0.458	0		RAMP2	-0.521	5.55e-215
SUPT4H1	0.752	0		ENSSSCG00000005643	-0.271	1.69e-99		ANKRD28	0.455	0		CD36	-0.932	5.66e-273
C1QBP	0.751	0		NDFIP1	-0.256	1.71e-65		RPL23	0.452	0		MYO1C	-0.652	5.67e-175
CCT3	0.749	0		GTF2I	-0.263	2.05e-93		MAP3K8	0.45	0		LTBP4	-0.651	5.69e-161
FAM102A	0.747	0		ENSSSCG00000009138	-0.254	2.07e-88		EPHA2	0.448	0		RUNX1T1	-0.629	5.78e-174
M6PR	0.747	0		ATF7IP	-0.259	2.21e-97		ENSSSCG00000006564	0.443	0		CXCL12	-0.699	6.3e-178
UBE2D2	0.744	0		PIK3C2A	-0.27	2.4e-97		ENSSSCG00000013361	0.441	0		DOCK9	-0.588	6.62e-139
PSME2	0.744	0		CCPG1	-0.282	2.55e-96		SLC1A5	0.438	0		GHSR	-0.827	6.71e-254
ENSSSCG00000033697	0.743	0		MGP	-0.3	2.68e-67		SQLE	0.436	0		PBX1	-0.582	7.19e-129
SSB	0.739	0		AMOTL2	-0.28	2.76e-72		NDRG1	0.434	0		COX5B	-0.484	7.29e-101
RPS12	0.738	0		ENSSSCG00000034230	-0.257	2.86e-70		ELL	0.43	0		ENSSSCG00000032003	-0.551	7.48e-199
PNN	0.738	0		RGL2	-0.273	2.91e-80		CBX4	0.43	0		F8	-0.521	7.65e-151
ARPC2	0.738	0		NEDD9	-0.285	3.26e-99		EEF1A1	0.429	0		BIRC6	-0.542	7.76e-116
SAP18	0.738	0		AIMP1	-0.274	3.34e-69		UAP1	0.429	0		ADGRF5	-0.639	7.81e-158
ZNFX1	0.737	0		TJP1	-0.274	3.5e-74		MAPK6	0.425	0		PSMA7	-0.489	7.92e-104
DDX39A	0.736	0		KLF6	-0.259	3.68e-67		PLP2	0.425	0		ENSSSCG00000016263	-0.474	7.95e-117
RPS4X	0.735	0		APPL1	-0.275	3.68e-98		DCUN1D3	0.424	0		CHST15	-0.45	8.51e-126
S100A11	0.734	0		ARHGEF12	-0.269	3.98e-99		KLHL15	0.424	0		ITGA1	-0.89	8.54e-304
SRSF6	0.733	0		WDR83OS	-0.269	4.44e-97		BCL3	0.423	0		ENG	-0.422	8.87e-180
ENSSSCG00000011272	0.73	0		RBM5	-0.278	4.72e-79		IL6	0.423	0		DNAH11	-0.545	8.97e-175
TXNRD1	0.73	0		PPIG	-0.259	5.19e-69		CHORDC1	0.422	0		SLC44A2	-0.652	9.04e-184
BTF3	0.729	0		CMTM8	-0.279	5.29e-88		ENSSSCG00000032242	0.422	0		NPR1	-0.534	9.88e-126
PRNP	0.727	0		PBRM1	-0.254	5.61e-87		UBALD2	0.422	0
CRK	0.726	0		POLR2I	-0.255	6.17e-95		SARAF	0.421	0
CD3EAP	0.725	0		ZC3H7A	-0.285	6.33e-87		THOC6	0.421	0
HSPD1	0.725	0		ZRANB2	-0.295	6.91e-97		IL4R	0.416	0
ENSSSCG00000013889	0.723	0		HYAL2	-0.288	7.1e-94		TMEM263	0.415	0
CCT4	0.723	0		ENSSSCG00000015814	-0.284	7.68e-96		DENND4A	0.414	0
UBE2D3	0.722	0		MGST3	-0.291	1.01e-178		NFIL3	0.413	0
OAZ1	0.719	0		AGRN	-0.376	1.01e-272		NXT1	0.413	0
CFLAR	0.718	0		DST	-0.308	1.02e-117		MAPKAPK2	0.411	0
CLTB	0.717	0		SUPT20H	-0.311	1.03e-201		CYSLTR2	0.409	0
CSNK1A1	0.714	0		DPYSL2	-0.349	1.03e-204		ENSSSCG00000006286	0.408	0
DSTN	0.713	0		APC	-0.336	1.04e-150		S100A4	0.407	0
NFKBIZ	0.71	0		APOLD1	-0.51	1.04e-247		TGIF1	0.405	0
ZFP36L1	0.71	0		CISH	-0.278	1.07e-100		TMEM41B	0.401	0
ENSSSCG00000033019	0.709	0		IPO11	-0.311	1.07e-101		PAWR	0.401	0
ENSSSCG00000000767	0.708	0		MBNL2	-0.322	1.09e-259		PFKFB3	0.4	0
EEF1D	0.707	0		PTPRG	-0.479	1.09e-302		ENSSSCG00000037142	0.4	0
TGFB1	0.706	0		MAT2B	-0.264	1.1e-106		TIFA	0.397	0
ENSSSCG00000014565	0.703	0		PHACTR2	-0.39	1.1e-194		ENSSSCG00000011676	0.391	0
ENSSSCG00000027746	0.703	0		ENSSSCG00000035364	-0.257	1.12e-141		CCNB1IP1	0.387	0
NUFIP2	0.703	0		HP1BP3	-0.367	1.12e-156		PHF23	0.385	0
DNAJB6	0.702	0		PPP6R2	-0.283	1.14e-224		MT-ND6	0.385	0
NOP58	0.7	0		MCRIP1	-0.313	1.15e-220		ENSSSCG00000044542	0.384	0
FERMT1	0.698	0		EBF1	-0.305	1.17e-256		ZBTB10	0.382	0
UBE2S	0.697	0		GCC2	-0.273	1.18e-112		TEAD4	0.382	0
RPS5	0.697	0		CAPN2	-0.366	1.2e-186		TUBB2B	0.381	0
PSMA5	0.696	0		USP8	-0.397	1.21e-272		SBNO2	0.38	0
CDKN1A	0.695	0		CNN3	-0.475	1.21e-280		GLA	0.377	0
NANS	0.693	0		ID3	-0.456	1.21e-283		STMN1	0.375	0
PNRC1	0.69	0		ENSSSCG00000006418	-0.314	1.22e-125		PHF13	0.374	0
ENSSSCG00000041731	0.69	0		FAM160A2	-0.335	1.23e-124		SLC41A1	0.372	0
TGIF1	0.689	0		TUBGCP2	-0.278	1.28e-239		UBE2S	0.371	0
ENSSSCG00000014540	0.689	0		EDF1	-0.342	1.31e-230		BCAR1	0.369	0
ENSSSCG00000033653	0.688	0		LMO7	-0.273	1.31e-279		TLR4	0.367	0
ENSSSCG00000040879	0.685	0		COX7C	-0.376	1.32e-174		ZBTB1	0.365	0
ENSSSCG00000006928	0.685	0		HERC1	-0.425	1.35e-303		SNAI1	0.363	0
MED4	0.682	0		TBCD	-0.264	1.39e-274		TLE3	0.362	0
YES1	0.681	0		RAPGEF4	-0.421	1.43e-217		HSPA6	0.36	0
PLXNA2	0.681	0		ASS1	-0.265	1.5e-191		WDR26	0.357	0
ILF2	0.681	0		SLU7	-0.321	1.53e-113		FAM177A1	0.355	0
KIAA1191	0.679	0		ITPR2	-0.302	1.61e-179		PLAU	0.352	0
G3BP1	0.679	0		PSMB8	-0.289	1.63e-100		CORO1C	0.349	0
C1orf21	0.678	0		LXN	-0.268	1.65e-264		AGO2	0.349	0
SNRPG	0.677	0		MFSD6	-0.336	1.68e-261		PDLIM7	0.348	0
RPS18	0.676	0		MYCBP2	-0.391	1.7e-173		EIF4EBP1	0.348	0
ENSSSCG00000005656	0.672	0		CTSF	-0.28	1.72e-289		STRADB	0.34	0
GARS1	0.672	0		SMCHD1	-0.375	1.74e-153		TNIP1	0.34	0
IL4R	0.669	0		EMC10	-0.336	1.74e-212		ENSSSCG00000031889	0.338	0
CALR	0.668	0		INPP5A	-0.28	1.74e-256		PTP4A1	0.337	0
VDAC2	0.668	0		PNISR	-0.377	1.75e-202		FBXO33	0.337	0
RRAD	0.665	0		SPTAN1	-0.334	1.77e-212		SLC10A1	0.337	0
YTHDF2	0.665	0		KRTCAP2	-0.386	1.78e-237		TBPL1	0.336	0
UOX	0.661	0		CCSER2	-0.323	1.79e-212		RASD1	0.333	0
ENSSSCG00000034448	0.658	0		NCOA3	-0.266	1.8e-117		FOSL1	0.329	0
RHEB	0.658	0		MPRIP	-0.25	1.8e-128		STK40	0.325	0
EEF2	0.657	0		DICER1	-0.324	1.84e-170		NUAK2	0.32	0
PPIB	0.656	0		UBTF	-0.258	1.85e-117		ELL2	0.319	0
NRIP1	0.656	0		CD320	-0.345	1.88e-291		ATP13A3	0.318	0
ENSSSCG00000010058	0.656	0		ENSSSCG00000008222	-0.312	1.89e-125		RELB	0.317	0
PTP4A2	0.655	0		MBTPS1	-0.363	1.91e-193		ATF1	0.317	0
BTG3	0.653	0		TLN1	-0.371	2.01e-163		A4GALT	0.314	0
EIF4E	0.653	0		SLPI	-0.414	2.01e-212		TAGLN	0.312	0
CCT7	0.652	0		MTUS1	-0.419	2.01e-303		HSPA13	0.309	0
SNU13	0.652	0		ENSSSCG00000017783	-0.253	2.03e-115		ENSSSCG00000003112	0.305	0
FCHSD2	0.65	0		PSAP	-0.355	2.07e-223		FN1	0.298	0
ENSSSCG00000000107	0.65	0		GLG1	-0.363	2.12e-278		KMT5A	0.296	0
UNC5B	0.649	0		IRF3	-0.261	2.14e-242		SEC24A	0.295	0
ENSSSCG00000000908	0.648	0		DIAPH2	-0.339	2.17e-219		INSIG1	0.294	0
SUMO2	0.647	0		CDC42EP4	-0.371	2.24e-265		MCAM	0.293	0
GPR4	0.645	0		UQCR10	-0.285	2.29e-143		TCF7	0.292	0
CXCL8	0.645	0		PPP1R21	-0.314	2.29e-230		MCM7	0.292	0
PMEPA1	0.641	0		SMIM14	-0.289	2.33e-261		BIN1	0.29	0
PSMD8	0.64	0		SPNS2	-0.332	2.38e-261		FAM102A	0.289	0
SNRPD1	0.64	0		RNF169	-0.319	2.39e-194		ABHD5	0.289	0
SRPRA	0.64	0		ZNF462	-0.252	2.4e-192		IFFO2	0.288	0
RPL27	0.64	0		SH2D3C	-0.32	2.41e-130		SLCO4A1	0.285	0
ARPC5L	0.639	0		ZNF518A	-0.258	2.43e-296		PPP1R18	0.282	0
PNO1	0.635	0		RSBN1L	-0.333	2.44e-213		RFK	0.277	0
DEGS1	0.634	0		DAG1	-0.292	2.44e-224		ENSSSCG00000012997	0.277	0
MYCT1	0.632	0		CDS2	-0.254	2.47e-191		SAMD4A	0.274	0
ENSSSCG00000025499	0.632	0		CPNE3	-0.44	2.48e-238		CLU	0.271	0
CHIC2	0.632	0		ENSSSCG00000009851	-0.434	2.57e-280		B3GNT2	0.266	0
EMG1	0.632	0		DNM3	-0.32	2.58e-166		CDR2L	0.266	0
GSPT1	0.631	0		LRRC8A	-0.368	2.65e-168		LDLR	0.265	0
RBMX	0.631	0		SP110	-0.254	2.66e-107		PMAIP1	0.264	0
RAI14	0.631	0		MPDZ	-0.289	2.68e-194		ENSSSCG00000005738	0.264	0
SLC25A25	0.63	0		NOP53	-0.314	2.7e-121		TP53BP2	0.262	0
EIF3J	0.629	0		SCARF1	-0.256	2.7e-127		RPLP2	0.338	1e-62
SNRPE	0.629	0		GRK2	-0.31	2.72e-210		KLF4	0.316	1.14e-50
CDC42EP3	0.629	0		PHLDB2	-0.261	2.73e-130		ETS2	0.459	1.16e-41
GNL3	0.626	0		ELMSAN1	-0.253	2.73e-263		CALM1	0.37	1.18e-68
ANKRD12	0.626	0		ENSSSCG00000036280	-0.328	2.77e-143		RPL38	0.412	1.21e-23
IER5L	0.625	0		SYT7	-0.351	2.78e-157		NEDD9	0.271	1.21e-31
HNRNPM	0.625	0		ENSSSCG00000033385	-0.3	2.78e-217		PNN	0.303	1.26e-53
PGK1	0.623	0		WASHC4	-0.344	2.81e-280		ENSSSCG00000003520	0.257	1.32e-21
CCNL1	0.621	0		FOXP1	-0.374	2.87e-192		LMO2	0.322	1.41e-61
RSRP1	0.619	0		USHBP1	-0.293	2.98e-207		HK1	0.473	1.41e-67
TXNL1	0.618	0		MXD4	-0.275	3.05e-232		PTBP1	0.437	1.57e-83
SAFB	0.618	0		IRF2	-0.257	3.09e-115		MEF2A	0.354	1.57e-90
PPP1R10	0.618	0		CAVIN2	-0.515	3.09e-280		ENSSSCG00000016737	0.55	1.58e-63
SNRPA1	0.617	0		CTNND1	-0.315	3.11e-140		MAP2K3	0.252	1.64e-58
PSMA6	0.617	0		SNRK	-0.431	3.12e-211		ENSSSCG00000025928	0.5	1.65e-86
WEE1	0.616	0		TMEM50A	-0.354	3.16e-165		NUDT3	0.316	1.71e-33
ETF1	0.616	0		VWF	-0.377	3.17e-141		RHOA	0.324	1.82e-31
ENSSSCG00000031893	0.614	0		AKR1A1	-0.272	3.17e-158		LUZP1	0.353	1.96e-23
DDX24	0.613	0		ADAM15	-0.276	3.2e-116		ENSSSCG00000005656	0.457	1.96e-92
PCBP1	0.61	0		MLLT6	-0.307	3.23e-216		ENSSSCG00000012119	0.361	2.08e-38
LDHA	0.609	0		VAMP5	-0.309	3.4e-108		DDIT4	0.344	2.14e-31
ENSSSCG00000022925	0.609	0		RABAC1	-0.456	3.41e-264		ENSSSCG00000039544	0.268	2.16e-09
RSL24D1	0.606	0		TCEA2	-0.253	3.44e-188		DEK	0.292	2.33e-16
FUS	0.605	0		HSPB1	-0.36	3.44e-242		EEF1D	0.544	2.33e-87
RPL7L1	0.605	0		EZH1	-0.262	3.5e-300		RPL36AL	0.57	2.36e-95
RPS17	0.604	0		ENSSSCG00000022058	-0.276	3.58e-231		ENSSSCG00000032436	0.301	2.42e-07
KIF5B	0.603	0		ZFP36L2	-0.382	3.64e-219		ARID4B	0.39	2.5e-92
HNRNPA2B1	0.603	0		LRRK1	-0.292	3.69e-283		ENSSSCG00000002963	0.307	2.77e-42
WDR43	0.602	0		ENSSSCG00000041446	-0.263	3.69e-298		CEBPB	0.516	2.78e-96
ENSSSCG00000020830	0.601	0		BBX	-0.399	3.72e-302		ADAMTS1	0.252	2.8e-30
HYPK	0.6	0		CREB3L2	-0.269	3.76e-261		HNRNPU	0.316	2.98e-51
RELB	0.598	0		LRRC70	-0.457	3.86e-248		MBNL1	0.402	3.15e-87
CASP10	0.598	0		KITLG	-0.393	3.87e-150		KIF5B	0.339	3.37e-78
LRRC8C	0.597	0		MLLT10	-0.338	3.9e-222		HNRNPA3	0.51	3.37e-95
RPS13	0.596	0		CWF19L2	-0.304	3.91e-136		SERBP1	0.481	3.38e-83
S100A10	0.594	0		ASAP2	-0.313	3.92e-126		RPL4	0.276	3.63e-19
ENSSSCG00000017626	0.594	0		GALNT18	-0.356	3.93e-143		ID2	0.341	3.73e-40
GHITM	0.591	0		ENSSSCG00000039894	-0.437	4.01e-255		IL6ST	0.293	3.8e-73
FUNDC1	0.591	0		SLC8A1	-0.472	4.02e-245		EFNA1	0.306	4.07e-43
MT-ND6	0.59	0		FKBP8	-0.281	4.02e-284		IFITM3	0.36	4.14e-17
PTGES	0.589	0		ADAM10	-0.507	4.03e-303		ENSSSCG00000014565	0.38	4.25e-26
DNAJA2	0.589	0		FCGRT	-0.363	4.04e-222		ENSSSCG00000007524	0.294	4.3e-28
NASP	0.589	0		ENSSSCG00000040118	-0.383	4.15e-207		PALM2AKAP2	0.424	4.35e-44
FAM111A	0.589	0		THSD7A	-0.264	4.19e-251		PTGES3	0.284	4.53e-95
SRSF10	0.587	0		FRMD3	-0.31	4.2e-303		ENSSSCG00000009341	0.293	4.55e-81
PTMA	0.587	0		VPS13C	-0.362	4.23e-306		SNRPD2	0.262	4.6e-25
PRSS23	0.585	0		CHST15	-0.294	4.27e-190		RPL22	0.493	4.72e-74
CDH5	0.583	0		TOLLIP	-0.278	4.28e-164		CHMP2A	0.252	5.18e-53
ENSSSCG00000013155	0.581	0		SPARCL1	-0.53	4.34e-269		HSD11B1L	0.44	5.2e-65
NABP1	0.579	0		ENSSSCG00000001927	-0.298	4.36e-230		SSB	0.322	5.28e-82
CLTA	0.578	0		EFNB1	-0.383	4.37e-195		ENSSSCG00000034709	0.454	5.35e-71
SMOX	0.578	0		SNX6	-0.324	4.57e-200		DUSP1	0.506	5.44e-63
ACTR3	0.576	0		HLTF	-0.423	4.59e-276		APOA1	0.408	5.6e-70
F2RL3	0.575	0		ENSSSCG00000037566	-0.289	4.89e-246		RAB5A	0.255	5.71e-81
ARL5B	0.573	0		ENSSSCG00000005518	-0.491	4.9e-301		GABARAPL2	0.294	5.78e-85
ENSSSCG00000003520	0.572	0		ENSSSCG00000003261	-0.298	4.93e-240		ANKRD12	0.442	5.93e-71
NAMPT	0.571	0		CHD6	-0.324	4.94e-162		ENSSSCG00000040879	0.333	6.85e-42
ENSSSCG00000010158	0.57	0		ENSSSCG00000008686	-0.377	4.95e-169		ENSSSCG00000000697	0.287	6.87e-96
BUD23	0.57	0		VPS13A	-0.447	4.95e-303		RPL29	0.413	7.4e-53
YY1	0.57	0		SPAG8	-0.251	4.98e-295		ERBB3	0.5	7.63e-82
PITPNB	0.569	0		BCAP29	-0.37	5.02e-255		RPS21	0.477	8e-83
RTN4	0.568	0		CDKN1B	-0.282	5.09e-126		RBM39	0.339	8.86e-39
CACYBP	0.567	0		RNASE4	-0.301	5.1e-145		PLEKHO1	0.386	9.72e-37
RAB10	0.567	0		DOCK4	-0.268	5.12e-116		ANXA5	0.269	9.75e-37
SRM	0.566	0		ESD	-0.348	5.14e-277		EEF2	0.348	9.8e-17
RPLP2	0.565	0		TBX3	-0.295	5.21e-169		NARS1	0.304	1e-189
GRASP	0.565	0		NOTCH4	-0.459	5.25e-299		CREBZF	0.333	1.02e-297
ENSSSCG00000011952	0.564	0		TMCO1	-0.386	5.35e-168		ENSSSCG00000038507	0.644	1.03e-124
LUC7L3	0.563	0		DOCK9	-0.36	5.37e-153		PPP2CB	0.31	1.03e-207
VASP	0.562	0		BRD3	-0.342	5.38e-254		RSRC2	0.77	1.03e-254
DLL4	0.561	0		RNF13	-0.287	5.42e-173		PMP22	0.352	1.04e-148
UBXN1	0.561	0		MBNL1	-0.313	5.47e-104		RBM3	0.47	1.04e-193
CHSY1	0.56	0		STK25	-0.251	5.47e-223		HNRNPH3	0.511	1.04e-204
SERP1	0.559	0		FCHO2	-0.316	5.49e-178		RPS5	0.626	1.06e-179
PAWR	0.559	0		ABR	-0.263	5.51e-105		ENSSSCG00000031381	0.366	1.06e-189
RPS3A	0.555	0		TPP1	-0.264	5.62e-189		SF3B6	0.384	1.06e-192
MEX3C	0.554	0		CIR1	-0.357	5.77e-172		TSPAN15	0.282	1.07e-280
RSRC2	0.551	0		PELO	-0.448	5.81e-222		SRSF6	0.333	1.08e-177
YWHAZ	0.551	0		CST3	-0.326	5.86e-127		KDSR	0.292	1.09e-180
ENSSSCG00000021576	0.551	0		LAMTOR4	-0.308	5.92e-194		EIF3E	0.332	1.11e-173
ZSWIM6	0.55	0		ZMYND8	-0.285	6.06e-134		ENSSSCG00000013889	0.641	1.11e-260
AZIN1	0.547	0		FILIP1	-0.318	6.11e-220		ENSSSCG00000017626	0.411	1.11e-270
TOB2	0.543	0		PITPNM2	-0.253	6.15e-208		IRAK2	0.304	1.11e-280
ENSSSCG00000016828	0.543	0		ENSSSCG00000020790	-0.292	6.17e-111		RAP1A	0.309	1.12e-106
XRN2	0.542	0		GPAA1	-0.277	6.2e-213		LUC7L3	0.568	1.12e-292
COQ10B	0.538	0		ENSSSCG00000033497	-0.308	6.24e-106		ENSSSCG00000011729	0.264	1.13e-233
STK40	0.537	0		MINDY2	-0.343	6.24e-229		RPL37	0.449	1.14e-199
MORF4L2	0.536	0		SLC12A7	-0.302	6.45e-130		CASP7	0.405	1.16e-273
NFKB2	0.535	0		RNF181	-0.272	6.66e-139		ENSSSCG00000014414	0.306	1.2e-170
PELI1	0.535	0		SH3BGRL3	-0.406	6.74e-215		CSRP2	0.391	1.2e-282
SLC25A5	0.535	0		VWA1	-0.399	6.82e-190		PFN1	0.35	1.21e-145
TNFRSF1B	0.534	0		CCDC85A	-0.252	6.93e-213		RPL30	0.701	1.21e-240
ENSSSCG00000029830	0.534	0		PTGIS	-0.368	6.96e-231		CHD1	0.616	1.21e-240
FURIN	0.533	0		MRTFB	-0.265	7.12e-184		MAPRE1	0.283	1.22e-173
PCNA	0.533	0		MTSS1	-0.281	7.28e-225		FURIN	0.253	1.22e-215
RALA	0.533	0		TAOK2	-0.409	7.37e-229		TXNL1	0.285	1.23e-124
UBC	0.531	0		VPS36	-0.387	7.45e-242		KLF9	0.391	1.23e-139
ENSSSCG00000014043	0.53	0		CALD1	-0.369	7.45e-300		NFKB2	0.276	1.23e-299
RPL10	0.53	0		CDC42BPA	-0.313	7.49e-109		DSTN	0.396	1.24e-257
SSR1	0.53	0		NBR1	-0.326	7.55e-243		GTF2B	0.319	1.24e-303
PSMB2	0.529	0		COX8A	-0.393	7.62e-195		RGS2	0.329	1.24e-304
MAP3K8	0.527	0		LAMP1	-0.344	7.76e-138		ENSSSCG00000010203	0.587	1.25e-164
KPNB1	0.527	0		ATP5IF1	-0.329	7.83e-120		SSR2	0.643	1.27e-147
ETS2	0.524	0		TBC1D9B	-0.316	7.85e-199		SSR4	0.458	1.29e-216
KLF10	0.524	0		ATRX	-0.489	7.87e-275		DDX5	0.808	1.29e-249
CAPZA1	0.524	0		ADD1	-0.263	8.14e-219		CBL	0.264	1.3e-215
TSC22D2	0.522	0		FBH1	-0.256	8.36e-123		DEPP1	0.281	1.33e-135
SZRD1	0.522	0		EHBP1	-0.261	8.43e-192		TOB2	0.72	1.33e-277
IPO7	0.522	0		U2SURP	-0.403	8.65e-180		CMPK1	0.353	1.33e-277
ARRDC4	0.522	0		PHF14	-0.27	8.9e-136		AFF1	0.365	1.35e-253
RSAD2	0.52	0		SH3BP5	-0.418	8.99e-232		MAP4K4	0.332	1.37e-167
NUP50	0.52	0		CAMK2G	-0.259	9.05e-267		CCNG2	0.336	1.37e-304
DNAJB9	0.519	0		EFNB2	-0.293	9.18e-100		PEA15	0.511	1.39e-269
FUBP1	0.518	0		DENND6A	-0.252	9.26e-225		GSPT1	0.281	1.44e-103
ZPR1	0.517	0		SMAD6	-0.275	9.29e-140		MKNK2	0.294	1.48e-269
SRP14	0.516	0		FLI1	-0.292	9.38e-100		ABL2	0.303	1.51e-286
SAFB2	0.516	0		CLSTN3	-0.283	9.52e-187		DAB2	0.324	1.52e-100
SPCS3	0.514	0		APOA1	-0.404	9.73e-160		ALYREF	0.316	1.52e-156
ENSSSCG00000036296	0.514	0		AMOTL1	-0.317	9.74e-198		ENSSSCG00000007692	0.353	1.53e-225
CDK17	0.513	0		GOLGB1	-0.353	9.75e-125		PRR13	0.313	1.55e-160
UBE2L6	0.512	0		ARRDC2	-0.359	9.84e-169		BRD2	0.835	1.55e-254
EIF3M	0.512	0		PARK7	-0.331	9.88e-145		FEM1C	0.34	1.55e-296
IFIH1	0.511	0		TMEM47	-0.399	9.9e-189		LRRC32	0.336	1.59e-104
TMEM165	0.511	0		PIK3C2B	-0.287	9.92e-173		RPL7L1	0.389	1.6e-242
PTGS2	0.509	0						RRBP1	0.37	1.62e-103
LITAF	0.509	0						EZR	0.272	1.62e-254
BIN1	0.508	0						ENSSSCG00000027746	0.3	1.63e-102
PAK1IP1	0.508	0						RSRP1	0.367	1.63e-298
CD164	0.506	0						AKAP12	0.76	1.65e-258
TIPARP	0.506	0						CAMTA1	0.275	1.65e-274
ACSL4	0.506	0						RPL27	0.675	1.66e-139
TUBB2B	0.506	0						LDHA	0.322	1.67e-253
SSR3	0.504	0						NR4A1	0.864	1.71e-296
BACH1	0.504	0						RPS9	0.361	1.72e-112
IRF8	0.503	0						LITAF	0.585	1.72e-146
PSMB3	0.503	0						RPS18	0.483	1.73e-136
GALNT1	0.502	0						SYPL1	0.346	1.74e-185
LRRC59	0.502	0						GPCPD1	0.276	1.74e-203
IGFBP2	0.5	0						FAM111A	0.485	1.78e-282
CHORDC1	0.498	0						SRSF3	0.673	1.81e-225
IL6	0.498	0						CARD19	0.271	1.82e-226
ENSSSCG00000000377	0.498	0						IFIT1	0.272	1.83e-147
PTPN1	0.497	0						TPM3	0.901	1.83e-300
ATP5F1A	0.496	0						ENSSSCG00000007735	0.268	1.85e-102
RNF122	0.494	0						FHOD1	0.257	1.85e-205
ENSSSCG00000033700	0.493	0						GATA2	0.329	1.9e-126
USP15	0.493	0						CFLAR	0.369	1.9e-185
KMT5A	0.492	0						GFOD2	0.257	1.93e-179
RPL7A	0.491	0						CREBRF	0.342	1.93e-294
PTPN2	0.49	0						ENSSSCG00000009633	0.651	1.94e-176
CHD1	0.49	0						PITPNB	0.46	1.95e-264
RAB5C	0.49	0						KLF7	0.4	1.97e-154
SLC20A1	0.489	0						PIM3	0.468	1.97e-185
SH3GLB1	0.488	0						UBQLN1	0.289	1.99e-205
CEBPZ	0.487	0						MARCHF5	0.253	2e-218
WFDC1	0.486	0						PTGS2	0.296	2e-293
BTF3L4	0.486	0						FERMT2	0.609	2.01e-140
GPATCH4	0.486	0						ENSSSCG00000029251	0.28	2.02e-160
DENND2C	0.486	0						SPAG9	0.414	2.03e-115
UBQLN1	0.486	0						CHD3	0.381	2.03e-198
RPL11	0.484	0						SEMA7A	0.325	2.04e-278
MAPRE1	0.483	0						RPSA	0.782	2.08e-211
OSMR	0.481	0						EEF1G	0.704	2.1e-159
GJC1	0.475	0						ENSSSCG00000013155	0.408	2.1e-176
CLEC2B	0.474	0						SASH1	0.494	2.11e-238
BAG3	0.473	0						ZFAND5	0.584	2.11e-288
OTUD4	0.473	0						RPL11	0.568	2.12e-296
ENSSSCG00000033952	0.47	0						PCDH17	0.287	2.13e-181
NFKBIE	0.47	0						ARPC5L	0.445	2.13e-247
IMP3	0.47	0						EIF1B	0.545	2.13e-300
ENSSSCG00000039731	0.469	0						ENSSSCG00000024974	0.471	2.14e-130
PPP2CA	0.469	0						ENSSSCG00000015712	0.264	2.15e-126
SLC39A1	0.469	0						PPP2R2A	0.36	2.15e-175
TRIOBP	0.469	0						ZMIZ1	0.63	2.15e-285
DAAM1	0.467	0						ENSSSCG00000038506	0.489	2.17e-114
ODC1	0.465	0						BCLAF1	0.617	2.2e-162
DYNLL1	0.463	0						RPS4X	0.892	2.2e-303
GCH1	0.462	0						ENSSSCG00000010158	0.322	2.22e-185
LYAR	0.461	0						POLB	0.386	2.22e-240
ENSSSCG00000034927	0.461	0						GIT1	0.327	2.23e-198
THOC6	0.461	0						SARS1	0.286	2.24e-209
RCAN1	0.46	0						PPP1R15B	0.252	2.25e-213
PSMD12	0.46	0						PLEC	0.377	2.29e-215
ZNF207	0.46	0						SLC25A6	0.764	2.3e-208
MOBKL3	0.459	0						HDGF	0.257	2.31e-153
ENSSSCG00000000405	0.459	0						PRMT1	0.337	2.32e-174
ELF2	0.458	0						HSPB1	0.857	2.32e-281
CCND2	0.458	0						DYNLL2	0.297	2.33e-186
RHOJ	0.457	0						TMEM19	0.346	2.37e-215
PHF23	0.457	0						PIP5K1A	0.296	2.37e-252
FTSJ3	0.455	0						YBX1	0.694	2.38e-151
MAP4K4	0.454	0						CLDN5	0.413	2.38e-196
EML4	0.454	0						TMED5	0.303	2.41e-123
NONO	0.453	0						ASXL1	0.254	2.43e-219
PHC2	0.452	0						ENSSSCG00000001930	0.35	2.46e-121
SLC39A6	0.451	0						MRPL17	0.405	2.46e-148
KDELR2	0.451	0						NAP1L1	0.581	2.5e-187
CLK1	0.45	0						UBXN1	0.475	2.61e-287
PSMB4	0.449	0						WAC	0.292	2.62e-160
SPPL2A	0.447	0						CCNYL1	0.296	2.62e-165
BHLHE40	0.447	0						GPR4	0.513	2.63e-274
NUDC	0.446	0						PPP4R3A	0.297	2.67e-140
RPS7	0.445	0						ARGLU1	0.461	2.71e-175
ENSSSCG00000024974	0.444	0						CALR	0.575	2.72e-114
ETV3	0.444	0						CLTB	0.316	2.75e-130
ATP5MG	0.443	0						ENY2	0.377	2.83e-255
CD79A	0.439	0						RALA	0.517	2.86e-291
MYC	0.439	0						PRDX1	0.367	2.9e-173
FOSL1	0.438	0						ZNF207	0.38	2.91e-303
CARS1	0.437	0						KLF6	0.44	2.93e-140
PLAU	0.437	0						RAP1B	0.669	2.94e-219
ANKFY1	0.437	0						RHEB	0.514	2.94e-290
TNFAIP8L1	0.436	0						RPS3	0.614	3.01e-220
TRIB1	0.436	0						ENSSSCG00000000576	0.347	3.02e-125
ENSSSCG00000006061	0.436	0						YWHAQ	0.295	3.02e-125
PHF5A	0.436	0						ABI1	0.256	3.02e-219
SLC7A1	0.436	0						KDM6B	0.319	3.05e-288
PGAM1	0.434	0						ENSSSCG00000011272	0.707	3.06e-286
HNRNPD	0.433	0						ENSSSCG00000006777	0.629	3.06e-299
POLR2F	0.432	0						RAB11A	0.38	3.07e-138
SERINC3	0.432	0						C15orf48	0.319	3.07e-253
ENSSSCG00000013906	0.429	0						MGP	0.389	3.13e-173
BATF3	0.429	0						MEPCE	0.276	3.14e-244
RPS20	0.429	0						EDN1	0.253	3.15e-247
MAX	0.429	0						HSPD1	0.288	3.16e-156
ATP6V1G1	0.428	0						YY1	0.516	3.23e-171
PSMA1	0.425	0						ENSSSCG00000003042	0.498	3.24e-240
MCAM	0.425	0						VDAC2	0.26	3.26e-140
SLC4A7	0.424	0						TNFRSF1B	0.313	3.28e-122
ENSSSCG00000032067	0.424	0						CCN2	0.306	3.29e-228
RRP15	0.424	0						COX7A2L	0.266	3.33e-107
APEX1	0.423	0						ENSSSCG00000035209	0.372	3.34e-245
ENSSSCG00000017913	0.423	0						ACOT13	0.29	3.44e-172
TSPAN12	0.423	0						S100A11	0.511	3.46e-149
IRF7	0.421	0						RPL17-C18orf32	0.653	3.52e-121
RNF126	0.421	0						MYADM	0.464	3.54e-245
PEA15	0.42	0						RPL35A	0.498	3.57e-133
NXT1	0.42	0						ZBTB11	0.305	3.57e-245
CSRNP1	0.418	0						MTUS1	0.44	3.59e-210
EIF3B	0.418	0						KPNB1	0.372	3.6e-163
RPS9	0.417	0						RPL21	0.757	3.64e-208
PLK3	0.416	0						ENSSSCG00000026430	0.532	3.65e-152
IL13RA1	0.416	0						ENSSSCG00000000908	0.362	3.69e-276
SH3PXD2A	0.414	0						BTF3	0.729	3.73e-174
SMNDC1	0.414	0						UOX	0.513	3.75e-115
CDKN1C	0.413	0						TCP1	0.275	3.77e-179
ENSSSCG00000006564	0.413	0						MOBKL3	0.357	3.8e-250
PSMD1	0.412	0						RAN	0.509	3.82e-191
KLHL15	0.412	0						RPL5	0.761	3.85e-256
SF3B6	0.41	0						RPL34	0.683	3.86e-278
SARAF	0.409	0						RACK1	0.59	3.9e-135
ENSSSCG00000000696	0.409	0						FAM110A	0.266	3.9e-283
NAA20	0.407	0						HNRNPH1	0.723	3.93e-231
HDAC2	0.406	0						DDX3X	0.799	3.95e-229
SLC16A1	0.406	0						ENSSSCG00000039731	0.26	3.97e-138
STC2	0.406	0						CLTA	0.395	3.98e-128
PSMA3	0.405	0						CYTH1	0.295	3.98e-188
GTPBP4	0.404	0						ENSSSCG00000033019	0.693	3.99e-160
PML	0.403	0						ACTN1	0.423	3.99e-226
PCMT1	0.402	0						BZW1	0.448	4e-137
MPHOSPH10	0.402	0						LAPTM4A	0.588	4.05e-102
AARS1	0.402	0						KLF13	0.373	4.09e-109
ENSSSCG00000024555	0.4	0						PCF11	0.339	4.11e-142
CLCN5	0.399	0						NCK2	0.319	4.13e-247
SRPK1	0.399	0						HNRNPA1	0.83	4.13e-297
ENSSSCG00000039249	0.398	0						TOX4	0.441	4.19e-290
ENSSSCG00000007692	0.398	0						KCMF1	0.293	4.23e-257
NCK2	0.397	0						NOP56	0.35	4.24e-242
EPHA2	0.395	0						MAFG	0.259	4.26e-298
CDC34	0.395	0						LMCD1	0.346	4.28e-208
ENSSSCG00000014361	0.395	0						GSK3B	0.394	4.29e-197
SERPINE2	0.393	0						RPS23	0.645	4.3e-214
RAB7A	0.392	0						ZBTB7A	0.302	4.34e-248
PSMD2	0.392	0						CTSV	0.609	4.37e-165
HSPA13	0.392	0						RARA	0.353	4.4e-295
GAR1	0.391	0						PLS3	0.339	4.56e-151
AAMP	0.39	0						VIM	0.594	4.56e-304
ZNF326	0.39	0						SFPQ	0.575	4.58e-118
P2RY6	0.389	0						FERMT1	0.262	4.6e-243
LARP1	0.389	0						ENSSSCG00000034448	0.546	4.67e-154
ENSSSCG00000032242	0.388	0						RHOJ	0.375	4.68e-158
PSMB7	0.387	0						TM4SF1	0.911	4.68e-290
CYB5B	0.387	0						FJX1	0.288	4.68e-298
NIP7	0.387	0						IFIH1	0.4	4.69e-266
CNEP1R1	0.387	0						YAF2	0.341	4.71e-266
G3BP2	0.387	0						EIF3A	0.594	4.73e-294
SNAI1	0.386	0						TRA2A	0.329	4.82e-241
MOB3C	0.383	0						ENSSSCG00000017920	0.26	4.84e-141
GPBP1	0.383	0						PMEPA1	0.308	4.86e-160
SMAD3	0.382	0						KMT2E	0.533	4.87e-128
METAP2	0.382	0						ARL4D	0.293	4.93e-241
SRRT	0.381	0						SNRPA1	0.252	5.03e-182
MCM7	0.38	0						RBM14	0.291	5.14e-172
MYO5A	0.379	0						LASP1	0.269	5.14e-172
KDSR	0.379	0						RNF19A	0.55	5.22e-233
RELA	0.378	0						GPBP1	0.607	5.32e-299
ASNS	0.377	0						PRPF4B	0.481	5.35e-148
NDUFB9	0.377	0						FOXO1	0.267	5.4e-147
MRPS26	0.377	0						NUP153	0.257	5.45e-201
ENSSSCG00000017106	0.376	0						CSDE1	0.37	5.48e-135
PDCD10	0.375	0						NFKB1	0.308	5.48e-212
ENSSSCG00000034049	0.375	0						PFDN2	0.463	5.49e-226
FHOD1	0.373	0						MAPK1IP1L	0.304	5.5e-230
VDAC1	0.373	0						RPS16	0.461	5.56e-107
RPS27A	0.372	0						SAFB	0.255	5.57e-124
TRIM28	0.371	0						ENSSSCG00000014043	0.366	5.61e-223
RNH1	0.37	0						ENSSSCG00000014031	0.39	5.65e-147
ENSSSCG00000014414	0.369	0						PPP1R10	0.606	5.68e-218
PFN1	0.369	0						ADAM9	0.346	5.79e-221
AGO2	0.368	0						SMNDC1	0.518	5.81e-290
SEMA3F	0.367	0						SAFB2	0.373	5.85e-211
LSM7	0.367	0						NFAT5	0.294	5.87e-158
SRPK2	0.367	0						NUP50	0.385	5.89e-246
WTAP	0.366	0						SQSTM1	0.508	5.92e-206
STOML2	0.366	0						DHX9	0.559	5.94e-236
DNAJB1	0.365	0						DHRS3	0.333	6.04e-159
DHX15	0.365	0						EIF3H	0.545	6.12e-215
MAFG	0.365	0						INTS6	0.269	6.16e-220
ATF6	0.364	0						RNF149	0.436	6.17e-267
EIF1AX	0.364	0						RPS6KA3	0.303	6.21e-149
TOX4	0.364	0						YES1	0.259	6.23e-176
RCL1	0.363	0						RBM8A	0.408	6.29e-126
LARP4	0.363	0						M6PR	0.326	6.38e-217
ENSSSCG00000016990	0.363	0						ANXA1	0.628	6.38e-257
SLCO4A1	0.363	0						PNPLA8	0.289	6.4e-215
TIMM8A	0.362	0						BST2	0.424	6.4e-242
TMEM19	0.362	0						ENSSSCG00000032028	0.649	6.41e-270
SNRPF	0.36	0						ENSSSCG00000040857	0.336	6.42e-207
IRAK2	0.359	0						SH3PXD2A	0.258	6.42e-278
HERC6	0.359	0						RSL24D1	0.257	6.49e-188
ENSSSCG00000022322	0.359	0						SLC25A3	0.719	6.62e-291
XBP1	0.358	0						SYS1	0.324	6.67e-139
EDN1	0.358	0						DAAM1	0.349	6.67e-209
EPRS1	0.358	0						CRK	0.647	6.76e-117
PDLIM1	0.357	0						ILF2	0.255	6.76e-205
TLR2	0.357	0						ENSSSCG00000031838	0.479	6.78e-248
AMPD2	0.357	0						PTPRE	0.281	6.8e-147
MARCHF3	0.356	0						RPL35	0.433	6.81e-101
YWHAH	0.356	0						TUBA1B	0.903	6.81e-299
WDR77	0.356	0						RPL23A	0.546	6.88e-102
SSR4	0.354	0						CSNK1A1	0.616	6.94e-182
DDX23	0.354	0						UNC5B	0.328	6.99e-195
EIF4A3	0.354	0						RPL37A	0.658	6.99e-234
RNF146	0.353	0						UBE2D3	0.668	6.99e-291
DAB2IP	0.353	0						ENSSSCG00000032525	0.25	7.01e-217
SPSB1	0.353	0						NET1	0.505	7.11e-296
SLC30A7	0.351	0						FNBP4	0.562	7.19e-255
PSMD3	0.351	0						ELF1	0.447	7.43e-292
MAPK6	0.348	0						SERPINE1	0.403	7.44e-215
BRIX1	0.348	0						YTHDF2	0.364	7.56e-226
CLINT1	0.348	0						PRDX2	0.367	7.58e-138
PFKFB3	0.348	0						DNAJB6	0.528	7.6e-240
OSER1	0.348	0						UBE2D2	0.324	7.63e-235
ENSSSCG00000007609	0.347	0						YWHAZ	0.594	7.74e-240
RBM18	0.346	0						PTPN12	0.275	7.8e-125
ATP5PB	0.346	0						MYO5A	0.362	7.88e-153
ACTN1	0.346	0						ATP1A1	0.427	7.92e-174
UBE2A	0.345	0						SMARCA5	0.428	8.04e-144
ENSSSCG00000006286	0.344	0						RPL3	0.638	8.07e-146
NFKB1	0.343	0						GNA13	0.339	8.18e-287
GRWD1	0.342	0						SRSF10	0.511	8.24e-196
ILF3	0.342	0						RPL36A-HNRNPH2	0.79	8.24e-222
ABCE1	0.342	0						GLUL	0.342	8.27e-256
ENSSSCG00000033733	0.341	0						SKIL	0.855	8.36e-284
SYPL1	0.34	0						RPS6	0.658	8.44e-157
CNIH4	0.34	0						S100A10	0.699	8.46e-191
PSMD11	0.34	0						RPL26	0.569	8.49e-226
ENSSSCG00000039635	0.338	0						HINT1	0.742	8.5e-196
NOL9	0.337	0						AHI1	0.381	8.56e-211
HERC5	0.337	0						ENSSSCG00000020830	0.783	8.63e-228
NAV2	0.334	0						RTRAF	0.25	8.68e-108
ENSSSCG00000037143	0.334	0						ANKFY1	0.378	8.78e-254
KCMF1	0.334	0						NOLC1	0.258	8.81e-190
PPP1R18	0.334	0						CHSY1	0.273	8.87e-294
ENSSSCG00000023305	0.331	0						CDK17	0.29	8.89e-173
CMPK2	0.331	0						C16orf72	0.348	8.99e-274
BAG1	0.331	0						RNF121	0.334	9.1e-268
CSRP2	0.33	0						VAPA	0.376	9.26e-224
CMPK1	0.328	0						NANS	0.577	9.27e-303
PSMD13	0.328	0						UBR5	0.349	9.47e-151
NPM3	0.328	0						PPP1R12A	0.414	9.54e-116
ENSSSCG00000036595	0.328	0						DNAJA2	0.387	9.6e-248
PPP4R2	0.327	0						YWHAH	0.625	9.6e-268
CASP8	0.327	0						FBL	0.291	9.67e-192
CREBZF	0.327	0						ENSSSCG00000001398	0.392	9.68e-178
ENSSSCG00000028513	0.327	0						TRIP10	0.332	9.7e-258
RRS1	0.327	0						CDK2AP2	0.311	9.7e-258
BUD31	0.326	0						RASSF3	0.258	9.72e-291
NUTF2	0.325	0						JUNB	0.277	9.78e-277
POLR1D	0.325	0
RBM14	0.32	0
POLR1C	0.32	0
SAR1B	0.319	0
CDK6	0.319	0
RYBP	0.318	0
MAGOHB	0.318	0
ENSSSCG00000039201	0.318	0
CALU	0.318	0
ORAI1	0.317	0
PRPF19	0.316	0
ENSSSCG00000006559	0.316	0
SNX18	0.316	0
NAV1	0.315	0
WDR82	0.314	0
PTPN11	0.313	0
B4GALT5	0.311	0
CTNNB1	0.31	0
TMEM41B	0.31	0
GTF2B	0.31	0
ACAT2	0.309	0
EBNA1BP2	0.309	0
TAF9	0.309	0
ENSSSCG00000041954	0.308	0
RNPS1	0.308	0
TCF7	0.307	0
SURF4	0.306	0
MRPL20	0.306	0
PSMC4	0.304	0
XPO5	0.304	0
MCFD2	0.303	0
CCDC59	0.303	0
PHAX	0.302	0
PSMC6	0.301	0
ENSSSCG00000013318	0.299	0
ENSSSCG00000003112	0.298	0
TMEM263	0.298	0
KPNA4	0.297	0
ELOA	0.297	0
PACSIN2	0.295	0
TLE3	0.294	0
DYNC1LI2	0.294	0
SIPA1L2	0.294	0
TCERG1	0.293	0
SACS	0.293	0
PRDM1	0.292	0
EIF3I	0.292	0
PPAN	0.292	0
SLC36A4	0.291	0
DCUN1D3	0.291	0
CSNK2A2	0.29	0
IMPAD1	0.29	0
MED31	0.29	0
WDR12	0.289	0
THUMPD1	0.289	0
FAM32A	0.288	0
TBC1D15	0.288	0
TWISTNB	0.287	0
PHF13	0.285	0
TAF5L	0.285	0
BMS1	0.285	0
ENSSSCG00000010954	0.285	0
RCC2	0.284	0
MAST2	0.284	0
LETM1	0.284	0
ENSSSCG00000040918	0.283	0
MAPK1IP1L	0.283	0
PHACTR4	0.282	0
AP1AR	0.282	0
SLC10A1	0.281	0
EPSTI1	0.281	0
ELAVL1	0.28	0
FTSJ1	0.28	0
PTRH2	0.28	0
RFK	0.279	0
ANGPTL4	0.279	0
GNA13	0.279	0
MAP2K1	0.278	0
TICAM1	0.278	0
TMEM129	0.278	0
RIOK1	0.278	0
AATF	0.278	0
GLUL	0.277	0
SNRPC	0.277	0
TSR1	0.277	0
KDM6B	0.277	0
ZC3H12A	0.276	0
ENSSSCG00000015011	0.276	0
NAA15	0.276	0
RNF11	0.275	0
OAS2	0.275	0
POLR2D	0.275	0
HSD3B7	0.275	0
MYBBP1A	0.275	0
ECM1	0.274	0
NDFIP2	0.274	0
SEC63	0.273	0
UBE2J2	0.273	0
ENSSSCG00000013361	0.273	0
TOMM40	0.272	0
SEC61A1	0.271	0
SH3GL1	0.27	0
PPP1CB	0.27	0
PRDX4	0.27	0
NOB1	0.269	0
ABL2	0.268	0
ELOC	0.268	0
VEGFA	0.268	0
PHF11	0.268	0
S100A6	0.267	0
TMEM189	0.267	0
ENSSSCG00000031117	0.266	0
MRPL40	0.266	0
PPRC1	0.266	0
TIFA	0.266	0
ENSSSCG00000012997	0.265	0
DENR	0.265	0
VEGFC	0.265	0
BZW2	0.265	0
ENSSSCG00000005358	0.264	0
EIF4G1	0.264	0
ENSSSCG00000000097	0.264	0
TEAD4	0.264	0
MAGOH	0.263	0
MEX3D	0.263	0
PPP2CB	0.263	0
ABCF1	0.263	0
ZFP2	0.262	0
AIMP2	0.262	0
AP1S2	0.261	0
SPHK1	0.261	0
UBALD2	0.261	0
POLR2H	0.26	0
ENSSSCG00000031889	0.26	0
GLUD1	0.26	0
PPM1G	0.26	0
ATF1	0.26	0
LARS1	0.259	0
JDP2	0.259	0
USP18	0.259	0
DNTTIP2	0.258	0
IFNGR2	0.256	0
HSPA14	0.256	0
HIVEP2	0.255	0
ELOVL1	0.255	0
BYSL	0.255	0
CEMIP2	0.254	0
FAM177A1	0.254	0
TCF15	0.254	0
BCAR1	0.253	0
SLC25A28	0.252	0
PPP1R15B	0.252	0
RUVBL1	0.251	0
NAA50	0.251	0
PSMD14	0.251	0
ENSSSCG00000026981	0.25	0
EIF4A2	0.324	1.03e-63
MGLL	0.28	1.38e-84
ENSSSCG00000002963	0.27	1.57e-78
ENSSSCG00000001398	0.374	1.58e-87
RPL36A-HNRNPH2	0.354	1.6e-87
DEK	0.312	1.63e-62
RHOA	0.312	1.67e-91
NUDT3	0.276	2.66e-87
RPL23A	0.292	2.67e-68
ID1	0.335	2.75e-56
LUZP1	0.28	4.09e-55
RAB2A	0.282	4.6e-62
ENSSSCG00000024313	0.325	5.38e-76
SRRM1	0.292	5.57e-49
RPL5	0.342	5.58e-70
ICAM2	0.314	1.02e-277
MAP1LC3A	0.382	1.04e-231
ENSSSCG00000022760	0.549	1.08e-275
PRPF40A	0.267	1.1e-180
ARF1	0.473	1.11e-267
ENSSSCG00000039544	0.414	1.14e-273
ENSSSCG00000021560	0.281	1.14e-273
CLIC4	0.426	1.16e-135
TMED2	0.251	1.21e-266
IFIT5	0.269	1.25e-287
SOX17	0.283	1.28e-243
JAK1	0.528	1.29e-274
TNFRSF1A	0.312	1.3e-253
PRDX2	0.436	1.36e-288
FNDC3B	0.33	1.37e-256
DNAJC8	0.28	1.38e-183
JARID2	0.326	1.41e-163
HNRNPU	0.494	1.44e-247
CD151	0.393	1.5e-172
YBX1	0.405	1.55e-107
FBXW11	0.277	1.55e-251
RPL36AL	0.394	1.58e-111
TRIR	0.273	1.63e-230
CAVIN1	0.332	1.64e-197
C11orf58	0.307	1.66e-125
PTGES3	0.307	1.67e-224
TBCA	0.252	1.68e-270
DYRK3	0.271	1.72e-293
RBM39	0.402	1.73e-118
ENSSSCG00000007743	0.393	1.78e-219
CDC37	0.276	1.82e-305
EIF3E	0.31	1.87e-298
SRSF5	0.28	1.89e-194
TAP1	0.296	1.89e-253
QRICH1	0.256	1.91e-290
PNRC2	0.324	1.92e-119
EWSR1	0.316	2.12e-283
PTBP1	0.389	2.2e-150
CTSS	0.495	2.26e-230
ROBO4	0.48	2.39e-190
CSDE1	0.353	2.4e-247
ENSSSCG00000030849	0.361	2.43e-221
BCLAF1	0.482	2.46e-213
EFNA1	0.513	2.52e-264
PSMA4	0.309	2.57e-290
SKP1	0.262	2.67e-130
ENSSSCG00000034709	0.553	2.8e-295
IFITM3	0.397	2.85e-132
CYTH1	0.257	2.91e-287
PRKAR1A	0.355	2.96e-179
DRAP1	0.282	2.98e-198
EIF3G	0.335	3.11e-179
ENSSSCG00000012427	0.401	3.13e-259
ENSSSCG00000038506	0.354	3.2e-233
ERH	0.314	3.2e-278
ENSSSCG00000007188	0.491	3.23e-270
CHMP2A	0.316	3.24e-149
HBP1	0.272	3.28e-239
SLTM	0.299	3.34e-264
ENSSSCG00000044051	0.487	3.4e-281
TMED10	0.334	3.46e-175
CD200	0.3	3.47e-299
PSMB1	0.256	3.64e-186
COX7A2	0.251	3.68e-113
DDX39B	0.306	3.78e-202
ANXA1	0.429	3.81e-288
TCF4	0.417	3.9e-158
SMARCA5	0.276	3.94e-158
RPL37A	0.302	4.05e-100
RAP1B	0.286	4.07e-141
ENSSSCG00000044700	0.374	4.07e-192
PSMC5	0.327	4.11e-267
PCBP2	0.289	4.21e-185
ANKRD11	0.272	4.26e-241
FNBP4	0.291	4.29e-177
RPS23	0.418	4.37e-246
EMP2	0.282	4.43e-244
ENSSSCG00000001414	0.324	4.64e-298
SOD1	0.35	4.77e-262
SIAH1	0.275	5.02e-197
TRIM25	0.273	5.11e-270
TLNRD1	0.29	5.33e-246
KLF7	0.306	5.45e-255
IGFBP4	0.301	5.52e-270
ITGB1	0.479	5.75e-218
ENSSSCG00000032028	0.351	6.14e-204
NSD3	0.303	6.16e-191
RPS15	0.256	6.25e-165
CAPRIN1	0.299	6.35e-298
STAT3	0.382	6.43e-284
JMJD1C	0.324	6.46e-107
ENSSSCG00000022176	0.423	6.83e-196
PDIA6	0.324	7.3e-272
EIF4H	0.313	7.31e-209
HSP90B1	0.435	7.94e-131
YAF2	0.255	7.99e-296
GATA2	0.323	8.07e-218
F11R	0.276	8.17e-298
RPL30	0.372	8.2e-125
DHRS3	0.509	8.42e-252
SRSF3	0.451	8.42e-263
ELF1	0.316	8.84e-307
PTPN12	0.259	8.89e-256
TMED7	0.255	9.06e-289
AFF4	0.264	9.21e-290
ENSSSCG00000025928	0.44	9.67e-231
RTRAF	0.322	9.68e-306
RPSA	0.467	9.8e-173

## Sheet: Glomeruli
Table S5: DEGs in gRECs
WT_up regulated				WT_down regulated				4KO_up regulated				4KO_down regulated
feature	logFC	padj		feature	logFC	padj		feature	logFC	padj		feature	logFC	padj
SERPINE1	3760	0		EMCN	-2778	0		PHLDA2	3505	0		EGFL7	-2727	0
RDH10	2945	0		SLC9A3R2	-2604	0		CXCL2	3375	0		TXNIP	-2104	0
PHLDA2	2725	0		MGP	-2431	0		MT-ATP6	2813	0		SLC9A3R2	-2026	0
RNF121	2701	0		IGFBP5	-2338	0		MT-COX1	2686	0		CLEC14A	-1785	0
ENSSSCG00000029160	2685	0		RAMP2	-2047	0		ND1	2675	0		TBX3	-1695	0
SOD2	2594	0		NRP1	-2034	0		FOS	2615	0		TGFBR2	-1653	0
CXCL2	2529	0		LIFR	-1994	0		BIRC3	2480	0		RAMP2	-1641	0
ATF4	2439	0		TXNIP	-1993	0		PPP1R15A	2454	0		EMCN	-1639	0
ENSSSCG00000030300	2421	0		ENSSSCG00000016548	-1840	0		ATF4	2400	0		NRP1	-1594	0
CCL2	2339	0		TBX3	-1812	0		H2AFZ	2375	0		PTPRB	-1589	0
ND1	2316	0		SPTBN1	-1789	0		ISG15	2314	0		ADGRL4	-1486	0
EIF1	2238	0		PBX1	-1738	0		HBEGF	2304	0		KDR	-1486	0
ENSSSCG00000014351	2221	0		TGFBR2	-1706	0		LMNA	2224	0		ENSSSCG00000032599	-1381	0
ISG15	2212	0		CLEC14A	-1681	0		SLC38A2	2222	0		APP	-1341	0
PPP1R15A	2204	0		TMEM204	-1656	0		SAT1	2134	0		PBX1	-1324	0
FOS	2171	0		TIMP3	-1611	0		UBB	2116	0		CLEC3B	-1316	0
TIMP1	2156	0		TNS2	-1552	0		IFRD1	2082	0		ENSSSCG00000016548	-1272	0
MT-COX1	2103	0		GATA5	-1496	0		EIF1	2023	0		EHD3	-1271	0
SLC38A2	2054	0		CYYR1	-1442	0		IER3	2013	0		MYL12A	-1267	0
HSP90AB1	1997	0		EGFL7	-1435	0		ENSSSCG00000029160	1931	0		CYYR1	-1252	0
CLDN5	1976	0		MEIS2	-1421	0		SERTAD1	1895	0		GATA5	-1242	0
EIF4A1	1936	0		PTPRB	-1385	0		ZFP36	1888	0		LIFR	-1231	0
EMP1	1920	0		MYO1C	-1382	0		EMP1	1869	0		SPTBN1	-1223	0
UBB	1895	0		CLEC3B	-1371	0		GAPDH	1863	0		TMEM204	-1213	0
TUBB4B	1866	0		KANK3	-1345	0		EIF4A1	1850	0		SEC62	-1207	0
ENSSSCG00000025582	1854	0		FABP5	-1342	0		TUBB4B	1793	0		TNS2	-1198	0
MT-ATP6	1853	0		ADGRL4	-1296	0		HSP90AB1	1775	0		IGFBP5	-1128	0
HES1	1837	0		CFD	-1287	0		ZFP36L1	1720	0		ENSSSCG00000033734	-1128	0
GADD45G	1808	0		APP	-1278	0		ENSSSCG00000017202	1699	0		NOSTRIN	-1117	0
HSPA5	1799	0		ARL15	-1278	0		PLAUR	1694	0		MYO1C	-1098	0
PLAT	1783	0		TSC22D1	-1274	0		ARL5B	1693	0		CLIC5	-1095	0
HSPA8	1765	0		ENSSSCG00000032599	-1257	0		TOP1	1687	0		FLT1	-1090	0
SAT1	1744	0		ITGA8	-1237	0		FTL	1670	0		GALNT18	-1078	0
ENSSSCG00000005453	1718	0		ITGA1	-1219	0		SOCS3	1667	0		FABP5	-1059	0
NPM1	1718	0		CRIP2	-1188	0		RASSF1	1665	0		PLPP1	-1051	0
ENSSSCG00000003079	1717	0		ENSSSCG00000033734	-1181	0		MT-ND3	1633	0		RAMP3	-1027	0
TNFAIP3	1692	0		NOSTRIN	-1173	0		REL	1604	0		SPARC	-1023	0
ZFAND5	1680	0		EHD3	-1169	0		MT-CYTB	1597	0		YWHAB	-1023	0
SOCS3	1668	0		CPEB4	-1150	0		JMJD1C	1592	0		PLVAP	-1011	0
ENSSSCG00000006777	1661	0		LDB2	-1149	0		HSPA5	1580	0		TCN2	-1007	0
IER3	1652	0		ENSSSCG00000011859	-1137	0		UBC	1580	0		HSPG2	-0.99	0
TSPAN15	1648	0		SEC62	-1136	0		MT-ND2	1569	0		ITGA8	-0.975	0
CTSV	1648	0		MEF2C	-1126	0		ENSSSCG00000014540	1566	0		TLE5	-0.969	0
PMP22	1640	0		KDR	-1126	0		MT-COX3	1560	0		DNASE1L3	-0.945	0
REXO2	1630	0		CD34	-1122	0		NR4A1	1555	0		ITGA1	-0.925	0
TUBA1B	1625	0		KLF2	-1119	0		TNFAIP3	1553	0		SYNE2	-0.914	0
FJX1	1615	0		APBB2	-1102	0		GRASP	1548	0		NUCKS1	-0.913	0
ENSSSCG00000017202	1609	0		CALCRL	-1097	0		RPL15	1547	0		ITGB1	-0.912	0
NFKBIA	1606	0		NUCKS1	-1094	0		TM4SF1	1539	0		CAPNS1	-0.906	0
GAPDH	1592	0		CASKIN2	-1091	0		MAFF	1536	0		PLD3	-0.906	0
TLR4	1590	0		TLE5	-1078	0		TUBA1B	1515	0		IL33	-0.889	0
FTL	1577	0		CLIC5	-1066	0		ENSSSCG00000011000	1511	0		PSAP	-0.885	0
RPL15	1576	0		LIMCH1	-1058	0		MAT2A	1501	0		PECAM1	-0.883	0
H2AFZ	1572	0		RASAL2	-1057	0		ENSSSCG00000037245	1490	0		MDK	-0.871	0
PLAUR	1569	0		ENSSSCG00000040410	-1042	0		ENSSSCG00000025582	1482	0		ARL15	-0.856	0
TM4SF1	1564	0		MTCH1	-1038	0		TXNRD1	1481	0		TMSB10	-0.846	0
ENSSSCG00000011000	1563	0		AOPEP	-1012	0		PLK2	1467	0		ENSSSCG00000001341	-0.841	0
HSP90AA1	1562	0		ARHGAP29	-1002	0		EIF4A2	1459	0		CD34	-0.836	0
SDCBP	1560	0		CALML4	-1001	0		ENSSSCG00000033310	1459	0		CANX	-0.829	0
MT-CYTB	1551	0		PLPP1	-1001	0		ZFAND5	1452	0		F8	-0.812	0
ENSSSCG00000004572	1544	0		TP53I11	-0.991	0		HSP90AA1	1440	0		CSTB	-0.811	0
GADD45B	1504	0		SPARC	-0.983	0		ENSSSCG00000039071	1436	0		ACVRL1	-0.807	0
CD40	1498	0		ENSSSCG00000015083	-0.974	0		GADD45A	1434	0		CALCOCO2	-0.803	0
CEBPB	1497	0		RAMP3	-0.968	0		CYCS	1433	0		NPR1	-0.782	0
PNP	1495	0		ENSSSCG00000001341	-0.962	0		AKAP12	1424	0		SLC44A2	-0.78	0
MAT2A	1493	0		TCN2	-0.961	0		PNRC1	1416	0		PSMA7	-0.776	0
SWAP70	1484	0		CCL14	-0.961	0		CCNL1	1404	0		TP53I11	-0.771	0
ENO1	1476	0		CAVIN2	-0.959	0		TRA2B	1398	0		TEK	-0.77	0
AKAP12	1465	0		MPPED2	-0.949	0		TIMP1	1391	0		PREX2	-0.763	0
ENSSSCG00000039071	1453	0		TTC3	-0.935	0		NUFIP2	1389	0		U2SURP	-0.749	0
PALM2AKAP2	1445	0		NOTCH1	-0.934	0		ARF6	1376	0		TIE1	-0.742	0
RAN	1445	0		TMSB10	-0.928	0		TUBB	1375	0		MMRN2	-0.74	0
ENSSSCG00000016737	1445	0		SLC44A2	-0.927	0		CKS2	1372	0		KANK3	-0.731	0
RBM3	1443	0		SYNE2	-0.905	0		MT-ND4	1362	0		CRIP2	-0.728	0
SFPQ	1436	0		RBMS3	-0.9	0		HSPA8	1359	0		ENSSSCG00000024791	-0.686	0
TNIP1	1419	0		PLD3	-0.899	0		SWAP70	1356	0		CD81	-0.669	0
LMNA	1403	0		ITGB5	-0.897	0		GADD45G	1353	0		RUNX1T1	-0.659	0
ENSSSCG00000033310	1393	0		SOX18	-0.88	0		NFKBIZ	1346	0		RDX	-0.615	0
PDE4B	1385	0		RIMS2	-0.879	0		NFKBIA	1342	0		TMEM150C	-0.615	0
BZW1	1379	0		RUNX1T1	-0.879	0		OAZ1	1335	0		SERF2	-0.596	0
SRSF2	1359	0		ITM2B	-0.87	0		STPG4	1333	0		STARD8	-0.595	0
HIF1A	1355	0		ARHGEF15	-0.828	0		PTPN1	1332	0		ATP5ME	-0.57	0
SNAPC1	1354	0		ACVRL1	-0.826	0		DDX5	1321	0		DNAH11	-0.562	0
ENSSSCG00000006395	1347	0		ENSSSCG00000033720	-0.825	0		RPLP0	1317	0		EPAS1	-0.549	0
SERTAD1	1342	0		CCDC50	-0.817	0		WWTR1	1308	0		ENSSSCG00000016263	-0.539	0
IFRD1	1326	0		TIAM1	-0.806	0		ZMIZ1	1301	0		B3GNT3	-0.478	0
SEC61B	1323	0		EPAS1	-0.762	0		GADD45B	1297	0		B2M	-0.335	0
RPLP0	1313	0		DNAH11	-0.758	0		ENSSSCG00000030300	1294	0		ITPR2	-0.255	1.02e-67
C15orf48	1300	0		BCAM	-0.753	0		SDCBP	1292	0		CDK19	-0.368	1.02e-87
GADD45A	1296	0		FGD5	-0.731	0		TOB2	1281	0		ENSSSCG00000011859	-0.33	1.04e-77
HBEGF	1292	0		NPDC1	-0.726	0		CEBPB	1281	0		AP2B1	-0.252	1.05e-80
SRSF7	1290	0		DIPK1B	-0.723	0		ENSSSCG00000036114	1280	0		SVIL	-0.369	1.08e-64
MT-COX3	1285	0		TNP2	-0.717	0		ETS2	1265	0		DICER1	-0.304	1.08e-77
CYCS	1284	0		RCSD1	-0.699	0		PLAT	1265	0		KRTCAP2	-0.324	1.08e-88
YBX3	1281	0		DYSF	-0.692	0		COQ10B	1258	0		ENSSSCG00000005643	-0.328	1.14e-83
PPA1	1278	0		ENSSSCG00000039807	-0.687	0		FOSB	1250	0		FGD5	-0.304	1.16e-39
HINT1	1277	0		HTRA1	-0.663	0		ATF3	1242	0		NOTCH1	-0.327	1.18e-55
STPG4	1274	0		NTN4	-0.65	0		ENSSSCG00000005453	1238	0		KITLG	-0.351	1.18e-84
CFL1	1265	0		DGKB	-0.619	0		SRSF7	1236	0		SBSPON	-0.295	1.18e-95
ARF4	1256	0		AFAP1L1	-0.608	0		GGCX	1230	0		PTPRE	-0.255	1.19e-25
SEMA7A	1252	0		B3GNT3	-0.603	0		BAZ1A	1224	0		FBXO22	-0.254	1.2e-45
IER5	1247	0		ENSSSCG00000038825	-0.6	0		ENSSSCG00000003079	1215	0		MAPK12	-0.255	1.2e-55
ZFP36L1	1244	0		APLNR	-0.597	0		RPL10	1215	0		SELENOH	-0.263	1.21e-98
BIRC3	1235	0		ENSSSCG00000033262	-0.548	0		RAC1	1200	0		NUMA1	-0.292	1.22e-65
GGCX	1217	0		FMO1	-0.541	0		BRD2	1178	0		RTF1	-0.343	1.23e-58
SELENOS	1205	0		NCALD	-0.54	0		ADAMTS4	1177	0		NOS3	-0.426	1.23e-99
PRDX1	1203	0		CIITA	-0.538	0		PELI1	1176	0		ATP5PF	-0.276	1.26e-34
NCL	1203	0		BCAS3	-0.524	0		SKIL	1166	0		FRMD4B	-0.319	1.26e-50
SQSTM1	1199	0		CDK19	-0.502	0		TAF1D	1163	0		LAMP2	-0.26	1.27e-30
ENSSSCG00000032591	1192	0		TMC6	-0.493	0		HNRNPA1	1162	0		ATP5MC1	-0.302	1.27e-70
FOSB	1188	0		PSMB8	-0.314	1.01e-37		NPM1	1161	0		TCF25	-0.29	1.28e-42
RPL21	1177	0		DNASE1L3	-0.56	1.01e-73		CLK1	1145	0		KMT2C	-0.322	1.28e-44
DYNLRB1	1173	0		ENSSSCG00000012238	-0.261	1.01e-84		ANGPTL4	1143	0		SELENOF	-0.342	1.3e-86
ICAM1	1172	0		MYADM	-0.286	1.03e-29		RPL7	1143	0		ARHGAP31	-0.264	1.31e-31
RAC1	1165	0		PITPNA	-0.282	1.03e-51		RPL6	1140	0		TMEM50A	-0.38	1.32e-82
BRD2	1162	0		FAM172A	-0.256	1.05e-56		CDKN1C	1132	0		SLC16A7	-0.281	1.34e-43
ENSSSCG00000014540	1159	0		HSPB1	-0.292	1.06e-52		DUSP1	1132	0		NIN	-0.35	1.45e-65
LAPTM4A	1156	0		PHF14	-0.314	1.08e-64		SOD2	1130	0		REX1BD	-0.262	1.45e-96
DDX21	1154	0		BCAP29	-0.335	1.09e-81		CCND2	1124	0		TMEM123	-0.264	1.48e-40
GSTO1	1154	0		MT-ND5	-0.301	1.1e-55		WSB1	1119	0		MCRIP1	-0.252	1.49e-49
EMILIN2	1150	0		TMEM88	-0.342	1.11e-70		VMP1	1104	0		ROBO4	-0.403	1.51e-83
ENSSSCG00000038506	1146	0		CUX1	-0.302	1.12e-41		RDH10	1096	0		IFI6	-0.313	1.52e-46
TRA2B	1141	0		DIAPH2	-0.313	1.12e-57		DUSP5	1088	0		ENSSSCG00000024313	-0.271	1.56e-37
IRF1	1135	0		BAMBI	-0.276	1.13e-84		ARF4	1087	0		APBB2	-0.328	1.56e-67
ENSSSCG00000037245	1130	0		ISG12(A)	-0.416	1.14e-70		CDKN1A	1082	0		ZMYND11	-0.27	1.58e-57
CKS2	1122	0		PIEZO2	-0.316	1.15e-63		ENSSSCG00000012427	1078	0		SLC44A1	-0.284	1.59e-59
SMURF2	1120	0		MARCKS	-0.252	1.16e-46		RAP1B	1076	0		TM9SF2	-0.351	1.59e-88
ZFP36	1119	0		HLTF	-0.389	1.16e-77		ETV3	1073	0		PSMD7	-0.278	1.64e-62
RASSF1	1117	0		STXBP3	-0.335	1.16e-80		TSC22D2	1068	0		ZNF148	-0.356	1.64e-97
ITGA5	1116	0		GNB4	-0.274	1.16e-98		ENSSSCG00000014361	1066	0		ENSSSCG00000033757	-0.293	1.66e-42
RRAD	1111	0		ZMYND11	-0.256	1.17e-29		ICAM1	1054	0		TRPM7	-0.263	1.68e-48
CXCL8	1097	0		DPYSL2	-0.261	1.17e-36		ENSSSCG00000000107	1053	0		SLA-DMA	-0.265	1.69e-57
ENSSSCG00000026430	1096	0		JAM3	-0.254	1.17e-42		RPS15A	1050	0		ENSSSCG00000022674	-0.251	1.7e-50
EEF1B2	1094	0		MPDZ	-0.274	1.17e-74		TPT1	1048	0		SH3BGRL3	-0.251	1.71e-29
MANF	1092	0		RPL38	-0.26	1.19e-58		CSRNP1	1039	0		PSMD1	-0.259	1.71e-44
TPT1	1088	0		ENSSSCG00000007524	-0.286	1.2e-40		CDV3	1037	0		CUX1	-0.337	1.71e-87
RPL28	1083	0		TMTC2	-0.318	1.2e-84		DDX3X	1032	0		BAZ2B	-0.341	1.74e-48
SLC25A3	1083	0		PTPRM	-0.438	1.22e-71		IRF1	1029	0		TNRC18	-0.302	1.74e-94
ATF3	1072	0		ARID5B	-0.322	1.26e-77		SLC25A6	1029	0		DNAJC8	-0.265	1.81e-40
TUBB	1070	0		SIPA1L2	-0.268	1.27e-29		MT-COX2	1028	0		VPS13A	-0.29	1.81e-55
NME2	1064	0		PPIG	-0.318	1.28e-44		RPS13	1026	0		SF3B1	-0.315	1.81e-95
TAF1D	1061	0		USF2	-0.263	1.31e-52		ENSSSCG00000006395	1026	0		CHD6	-0.273	1.83e-56
ENSSSCG00000014031	1060	0		FKBP5	-0.339	1.32e-58		YY1	1011	0		SLC6A6	-0.27	1.83e-93
HNRNPA1	1056	0		MBNL2	-0.316	1.32e-84		YBX3	1008	0		CCSER2	-0.257	1.84e-68
ENSSSCG00000009633	1054	0		U2SURP	-0.466	1.33e-73		HNRNPA0	1004	0		PNISR	-0.325	1.88e-63
PSMD7	1050	0		VWF	-0.402	1.33e-91		IER5	1004	0		ENSSSCG00000027538	-0.301	1.88e-72
RPL7	1046	0		ENSSSCG00000020790	-0.334	1.35e-47		NCL	0.997	0		DOCK9	-0.271	1.89e-38
BAZ1A	1046	0		BMPR2	-0.443	1.35e-67		HNRNPH1	0.992	0		HNRNPR	-0.327	1.89e-58
DUSP5	1037	0		IL33	-0.514	1.36e-75		CDC42EP2	0.988	0		TNRC6B	-0.334	1.89e-81
SLC41A1	1033	0		CAMTA2	-0.269	1.4e-35		EMILIN2	0.987	0		BBX	-0.296	1.9e-58
RPS12	1029	0		RGL1	-0.372	1.42e-96		HIVEP2	0.985	0		EEA1	-0.263	1.94e-52
TXNRD1	1029	0		RSBN1L	-0.363	1.47e-78		NFKBIE	0.981	0		SNRK	-0.322	1.97e-50
CFLAR	1028	0		TMEM150C	-0.452	1.47e-91		SMURF2	0.979	0		ATM	-0.258	2.07e-74
SEC61G	1022	0		ZBTB22	-0.265	1.48e-26		CLIC4	0.977	0		VWA1	-0.345	2.08e-91
VCP	1021	0		COMMD6	-0.252	1.48e-51		GLS	0.977	0		GOLIM4	-0.263	2.11e-92
ALYREF	1020	0		ITPR2	-0.307	1.48e-52		ENSSSCG00000029830	0.977	0		CD200	-0.279	2.14e-42
MAP7D1	1018	0		ENSSSCG00000008686	-0.44	1.48e-69		SLC25A25	0.973	0		RALB	-0.332	2.18e-81
ENSSSCG00000033952	1016	0		MGST3	-0.264	1.48e-69		GPBP1	0.97	0		ELK3	-0.367	2.29e-89
SLC3A2	1014	0		CWF19L2	-0.27	1.54e-38		SMNDC1	0.966	0		NFIC	-0.34	2.37e-53
ARF6	1010	0		CST3	-0.35	1.56e-43		ENSSSCG00000033697	0.955	0		PSMC5	-0.3	2.38e-68
ATP1A1	1009	0		ENSSSCG00000004963	-0.269	1.56e-52		PDE4B	0.954	0		ARHGAP28	-0.314	2.44e-50
TMED5	1008	0		ARHGAP5	-0.254	1.61e-20		RNF19A	0.954	0		HECTD1	-0.364	2.47e-63
EIF1B	0.998	0		MBTPS1	-0.297	1.63e-39		MEX3C	0.945	0		FNDC3B	-0.318	2.54e-45
ENSSSCG00000040857	0.992	0		AKT3	-0.397	1.64e-63		BTG3	0.942	0		RBM5	-0.303	2.58e-43
RPL6	0.99	0		DENND6A	-0.262	1.65e-76		WEE1	0.939	0		PSMC3	-0.318	2.61e-75
RPL32	0.988	0		PBRM1	-0.331	1.66e-51		RSRC2	0.939	0		ENSSSCG00000007188	-0.365	2.66e-91
DDX5	0.983	0		GJA5	-0.432	1.66e-95		ADM	0.936	0		DDX6	-0.321	2.76e-66
PSMA2	0.982	0		DGKE	-0.266	1.67e-38		AZIN1	0.932	0		ITSN2	-0.253	2.85e-39
CDKN1A	0.98	0		EFNB1	-0.31	1.68e-31		ENSSSCG00000004307	0.931	0		HOOK3	-0.268	2.88e-30
CHMP4B	0.973	0		COL12A1	-0.468	1.69e-73		SUPT4H1	0.931	0		ENSSSCG00000041656	-0.413	2.9e-84
UBC	0.959	0		ENSSSCG00000004082	-0.516	1.7e-88		PALM2AKAP2	0.93	0		CRIM1	-0.35	2.95e-63
LPGAT1	0.958	0		JAG2	-0.258	1.7e-95		ENSSSCG00000030849	0.926	0		ENSSSCG00000015814	-0.424	2.96e-95
CDC42EP2	0.954	0		ENSSSCG00000027565	-0.37	1.72e-92		SRSF2	0.925	0		CYP20A1	-0.251	2.99e-27
PMEPA1	0.952	0		BOD1L1	-0.294	1.74e-24		RPS4X	0.924	0		RBMS1	-0.325	3e-49
NFKBIZ	0.949	0		IFI35	-0.258	1.75e-76		PPA1	0.914	0		USP34	-0.293	3.04e-48
ENSSSCG00000033697	0.945	0		PAXX	-0.319	1.76e-64		ENSSSCG00000036296	0.914	0		FER	-0.338	3.06e-98
RPL10	0.943	0		UQCR10	-0.265	1.77e-44		EEF1B2	0.905	0		CLDN5	-0.253	3.07e-26
HNRNPA0	0.934	0		SUPT20H	-0.302	1.77e-51		ENSSSCG00000011272	0.902	0		DDX17	-0.375	3.08e-82
RPS15A	0.922	0		TRPM7	-0.266	1.78e-23		PNP	0.902	0		MAN1C1	-0.258	3.13e-78
GNG10	0.919	0		ENSSSCG00000006418	-0.361	1.83e-46		CAVIN1	0.898	0		ALCAM	-0.277	3.17e-45
FBL	0.915	0		TJP1	-0.285	1.84e-26		SLC3A2	0.897	0		CCNL2	-0.285	3.18e-37
PTGES	0.909	0		ARMCX3	-0.274	1.84e-65		RND1	0.897	0		ADD1	-0.266	3.21e-99
ENSSSCG00000003839	0.907	0		TNKS2	-0.26	1.85e-33		PTP4A2	0.895	0		TIAM1	-0.365	3.22e-55
MAFF	0.902	0		RNF145	-0.273	1.85e-50		HINT1	0.895	0		CAP1	-0.275	3.22e-95
VAPA	0.898	0		TLN1	-0.393	1.85e-63		NET1	0.895	0		VPS4B	-0.302	3.23e-49
STX11	0.894	0		MRPL55	-0.267	1.85e-68		ENSSSCG00000009633	0.893	0		RESF1	-0.259	3.27e-31
ADGRG1	0.892	0		ITSN2	-0.306	1.87e-39		RNF19B	0.891	0		ENSSSCG00000036280	-0.272	3.29e-79
SUPT4H1	0.883	0		TOMM7	-0.267	1.87e-65		SPRY4	0.891	0		TMA7	-0.381	3.53e-94
ENSSSCG00000011676	0.879	0		ENSSSCG00000009327	-0.333	1.91e-99		RTN4	0.888	0		MGP	-0.581	3.61e-82
TUBB6	0.876	0		PPM1F	-0.29	1.92e-66		RPL32	0.885	0		PHACTR2	-0.282	3.64e-31
RPS20	0.876	0		MBNL1	-0.502	1.92e-89		MTUS1	0.885	0		SPPL2A	-0.281	3.68e-39
RGS16	0.871	0		SH3BGRL3	-0.343	1.93e-45		NSD3	0.883	0		CAPZA2	-0.256	3.74e-34
CCN1	0.868	0		ZC3H7A	-0.437	1.94e-72		KPNA2	0.88	0		SMIM7	-0.334	3.75e-66
ENSSSCG00000004307	0.867	0		CCSER2	-0.339	1.94e-78		DYNLL1	0.873	0		STING1	-0.255	3.81e-42
DDX39A	0.866	0		PLAAT3	-0.274	1.95e-52		EIF1B	0.872	0		ENSSSCG00000011237	-0.276	3.86e-35
SLC25A5	0.866	0		NOL7	-0.32	1.96e-34		FAM110A	0.872	0		ENSSSCG00000015645	-0.277	3.95e-49
HSPH1	0.865	0		KRTCAP2	-0.411	1.97e-87		ENSSSCG00000013889	0.871	0		PLCD1	-0.283	4e-60
UBE2D2	0.859	0		ZCCHC14	-0.28	2.04e-54		ENSSSCG00000006928	0.869	0		RRAS	-0.409	4e-90
PGM2	0.858	0		ENSSSCG00000013436	-0.252	2.05e-49		CSNK1A1	0.868	0		TAOK2	-0.346	4.04e-90
PAWR	0.856	0		APC	-0.432	2.05e-68		DLL4	0.866	0		DIAPH2	-0.316	4.06e-84
SEPTIN11	0.852	0		CXXC5	-0.26	2.07e-58		RPS12	0.86	0		ZNF644	-0.259	4.07e-40
NOLC1	0.851	0		DICER1	-0.342	2.1e-68		PLK3	0.857	0		CAPN2	-0.296	4.08e-45
IER5L	0.841	0		ESD	-0.326	2.11e-95		ENSSSCG00000034049	0.854	0		ITGA6	-0.331	4.16e-77
DNAJB9	0.829	0		CENPC	-0.282	2.14e-41		RPL5	0.852	0		RFC1	-0.294	4.19e-74
RSRP1	0.793	0		ZCCHC7	-0.254	2.15e-77		CHD1	0.85	0		ACTB	-0.394	4.19e-79
RND1	0.784	0		ABR	-0.347	2.2e-50		ENSSSCG00000026430	0.845	0		PRPF6	-0.292	4.22e-94
ENSSSCG00000034448	0.778	0		MLLT10	-0.335	2.2e-84		ENSSSCG00000024555	0.844	0		PTPRM	-0.339	4.37e-54
ENSSSCG00000013889	0.771	0		DAG1	-0.262	2.22e-65		CFLAR	0.843	0		ASAP2	-0.256	4.4e-27
B3GNT2	0.771	0		SLC8A1	-0.325	2.26e-73		HSPH1	0.841	0		FAM204A	-0.322	4.4e-85
RPS27A	0.674	0		KMT5B	-0.3	2.27e-44		RPS3A	0.839	0		SH2D3C	-0.277	4.46e-33
KMT2E	0.356	1e-31		SMAD6	-0.468	2.27e-95		SLC25A3	0.839	0		PDIA3	-0.39	4.46e-76
OTUD4	0.321	1.01e-91		SRRM2	-0.303	2.28e-76		NEDD9	0.834	0		BMPR2	-0.347	4.5e-69
NUDT3	0.322	1.05e-39		RNF181	-0.318	2.3e-58		ENSSSCG00000014569	0.826	0		MEF2C	-0.378	4.55e-81
SELENOT	0.298	1.05e-49		ATP5ME	-0.379	2.32e-57		ZSWIM6	0.826	0		UBTF	-0.272	4.57e-65
ENSSSCG00000014569	0.287	1.06e-33		FCGRT	-0.35	2.37e-54		RPS27A	0.824	0		MEIS2	-0.428	4.6e-92
SSR2	0.427	1.06e-43		ECHS1	-0.285	2.41e-49		RPL7A	0.82	0		SNRNP70	-0.383	4.65e-71
KDSR	0.38	1.06e-83		STAT5B	-0.311	2.41e-67		MAP7D1	0.819	0		VPS29	-0.262	4.7e-86
ENSSSCG00000013318	0.268	1.08e-74		JCAD	-0.269	2.46e-87		TOPORS	0.819	0		EPB41	-0.251	4.71e-65
HDAC2	0.28	1.08e-82		NTAN1	-0.283	2.47e-28		POLR2K	0.811	0		SF3B2	-0.364	4.72e-96
ENSSSCG00000010954	0.372	1.08e-84		SETD5	-0.308	2.49e-32		SLC25A5	0.808	0		EFR3A	-0.255	4.73e-65
ENSSSCG00000022760	0.422	1.09e-40		ENSSSCG00000002547	-0.292	2.5e-40		ENSSSCG00000007735	0.805	0		NDUFB4	-0.293	4.84e-87
UBE2J2	0.292	1.09e-91		NIN	-0.342	2.53e-36		DENND2C	0.805	0		PIEZO2	-0.317	4.89e-76
ENSSSCG00000039544	0.38	1.1e-36		C5orf24	-0.411	2.58e-73		GPX1	0.804	0		ENSSSCG00000039894	-0.428	4.9e-92
MAST4	0.38	1.12e-70		ENSSSCG00000032073	-0.268	2.58e-91		ENSSSCG00000031838	0.802	0		DYNC1H1	-0.287	4.91e-44
LSM7	0.304	1.12e-76		PITPNM2	-0.258	2.58e-97		CHIC2	0.801	0		SLU7	-0.295	4.91e-52
MGAT2	0.33	1.13e-97		CMTM7	-0.261	2.69e-73		ELF1	0.798	0		TNRC6A	-0.264	4.95e-75
ENSSSCG00000032436	0.372	1.14e-25		ENSSSCG00000034230	-0.301	2.7e-33		HBP1	0.789	0		FNDC3A	-0.273	4.99e-33
RAB2A	0.419	1.15e-39		CDC42EP4	-0.264	2.73e-59		ENSSSCG00000004970	0.788	0		FRYL	-0.256	5.01e-85
BCLAF1	0.523	1.15e-69		METTL25	-0.291	2.73e-65		CHMP4B	0.785	0		CORO2B	-0.266	5.04e-89
ARRDC3	0.328	1.15e-95		ZNF638	-0.272	2.74e-34		RPL37A	0.784	0		ENSSSCG00000044051	-0.286	5.11e-35
SKIL	0.347	1.17e-26		DOCK4	-0.283	2.74e-43		PFKFB3	0.78	0		ENSSSCG00000049158	-0.347	5.11e-76
DLL4	0.431	1.17e-74		PRRC2C	-0.251	2.75e-48		RPL35A	0.779	0		COX7A2	-0.293	5.2e-46
METTL21A	0.302	1.17e-98		TBC1D9B	-0.367	2.75e-93		GATA2	0.777	0		ZRANB2	-0.287	5.46e-46
YAF2	0.4	1.19e-98		CTNND1	-0.353	2.77e-66		RPL28	0.775	0		LAMTOR4	-0.278	5.47e-67
RBBP6	0.251	1.21e-44		MPRIP	-0.295	2.78e-60		DNAJB6	0.771	0		ENSSSCG00000012961	-0.333	5.48e-79
RASSF8	0.306	1.21e-73		EPB41L4A	-0.256	2.82e-45		RPL30	0.762	0		TRIP11	-0.35	5.67e-79
PRPF19	0.288	1.21e-86		GPAA1	-0.259	2.82e-72		AFF4	0.757	0		PTPRG	-0.364	5.69e-67
PFN1	0.28	1.23e-37		ASAP2	-0.43	2.84e-84		DYRK3	0.757	0		PPIB	-0.264	5.91e-32
CTNNB1	0.251	1.24e-44		NKTR	-0.391	2.88e-53		NDEL1	0.75	0		HYAL2	-0.399	6.02e-74
ENSSSCG00000024313	0.584	1.24e-85		NDUFB7	-0.275	2.93e-30		CASP10	0.749	0		HERC1	-0.345	6.03e-58
NOP10	0.279	1.25e-31		PLVAP	-0.593	2.94e-62		CASP8	0.746	0		ENSSSCG00000044700	-0.426	6.05e-89
INO80	0.258	1.29e-41		MECOM	-0.268	2.97e-64		RPS7	0.745	0		ENSSSCG00000015083	-0.366	6.08e-94
PEA15	0.301	1.29e-46		ENSSSCG00000038144	-0.324	2.98e-40		UBALD2	0.743	0		PUM2	-0.302	6.09e-53
GABARAPL2	0.416	1.29e-62		CDC42BPA	-0.328	3.08e-38		RPS20	0.739	0		GINM1	-0.298	6.14e-69
SKP1	0.251	1.3e-29		ITM2A	-0.336	3.08e-41		ARID4A	0.738	0		IL15	-0.28	6.16e-79
PPAN	0.259	1.3e-87		ENSSSCG00000008222	-0.354	3.1e-55		RPS23	0.737	0		ARPC3	-0.376	6.17e-77
ZNF503	0.316	1.3e-99		RNF115	-0.294	3.14e-54		RPL23	0.731	0		FCHO2	-0.289	6.21e-48
KPNB1	0.29	1.31e-40		COL5A2	-0.385	3.16e-96		MAPKAPK2	0.73	0		ATP2B4	-0.34	6.26e-73
RPL36AL	0.437	1.31e-42		ENSSSCG00000027046	-0.288	3.2e-47		ENSSSCG00000001398	0.727	0		DBI	-0.325	6.36e-99
UBN1	0.254	1.35e-59		EMC10	-0.363	3.24e-90		RPS3	0.726	0		POMP	-0.379	6.39e-92
PSMC5	0.381	1.36e-62		LAMP1	-0.262	3.29e-25		RBMX	0.725	0		RARRES2	-0.299	6.42e-83
EIF5B	0.504	1.36e-81		HIPK2	-0.338	3.31e-64		TSPAN15	0.714	0		EDF1	-0.269	6.43e-66
KLF4	0.36	1.37e-40		RNF13	-0.269	3.32e-45		GNA13	0.714	0		PEAR1	-0.278	6.44e-87
EEF2	0.441	1.37e-44		TRIP11	-0.268	3.34e-22		ENSSSCG00000022322	0.713	0		FMNL2	-0.328	6.45e-81
CREBRF	0.283	1.4e-61		HP1BP3	-0.383	3.34e-53		PABPC1	0.711	0		NOP53	-0.365	6.5e-83
STOML2	0.325	1.4e-97		EXOC2	-0.347	3.34e-90		NUAK2	0.706	0		RNF169	-0.251	6.53e-69
MIS12	0.261	1.41e-64		SLC50A1	-0.251	3.41e-76		PCNA	0.705	0		C5orf24	-0.284	6.62e-39
HYOU1	0.287	1.41e-92		IKBKG	-0.278	3.44e-67		PMP22	0.701	0		PPP6R2	-0.265	6.67e-92
MYDGF	0.371	1.43e-94		TMCO1	-0.334	3.45e-40		ENSSSCG00000013906	0.696	0		AIMP1	-0.332	6.69e-69
ELAVL1	0.25	1.47e-54		ENSSSCG00000038364	-0.361	3.48e-61		RHEB	0.693	0		ENSSSCG00000027565	-0.252	6.74e-43
ZBTB1	0.276	1.47e-87		FKBP9	-0.264	3.56e-81		TLE4	0.689	0		ENSSSCG00000002907	-0.287	6.84e-65
CCDC59	0.251	1.48e-57		ZNF462	-0.256	3.6e-82		EIF4E	0.688	0		PIEZO1	-0.307	7.02e-93
NFE2L2	0.32	1.49e-58		SMCHD1	-0.429	3.66e-66		RPL11	0.682	0		ENSSSCG00000007688	-0.264	7.27e-79
CD9	0.446	1.5e-44		IQGAP1	-0.388	3.69e-75		RNF121	0.679	0		HNRNPUL1	-0.253	7.34e-47
RPL22	0.253	1.51e-05		SVIL	-0.337	3.74e-36		RPL34	0.676	0		IK	-0.309	7.37e-40
PSMA4	0.462	1.51e-99		SLC16A13	-0.255	3.77e-30		PLP2	0.676	0		PDIA4	-0.257	7.65e-55
MRPL20	0.325	1.52e-80		VEGFC	-0.327	3.77e-33		NFKB1	0.674	0		LIN7C	-0.273	7.87e-75
SNX9	0.339	1.54e-72		PROS1	-0.42	3.77e-75		PAWR	0.674	0		CHST15	-0.264	7.92e-78
PRELID1	0.307	1.55e-71		FLOT2	-0.25	3.8e-62		EPHA2	0.672	0		PPP4R3B	-0.289	8.06e-53
SYPL1	0.403	1.55e-91		FBXO22	-0.364	3.85e-59		RSRP1	0.672	0		ENSSSCG00000008686	-0.376	8.29e-79
ENSSSCG00000001456	0.252	1.56e-06		BIRC6	-0.507	3.85e-96		TRIB1	0.671	0		NBEA	-0.452	8.43e-99
ENSSSCG00000032916	0.267	1.57e-56		SMIM14	-0.272	3.86e-90		PPP1R14B	0.67	0		SPTAN1	-0.306	8.6e-81
MACO1	0.346	1.57e-84		RNPEPL1	-0.265	3.9e-79		GIT1	0.668	0		PLCL2	-0.271	8.73e-33
G3BP2	0.383	1.58e-93		GIT2	-0.282	3.92e-54		MAP3K8	0.665	0		DPYSL2	-0.251	8.93e-78
MAP2K1	0.286	1.58e-93		SATB1	-0.258	3.95e-78		STX11	0.663	0		APC	-0.306	9.12e-47
PSMA6	0.258	1.59e-23		ID3	-0.269	3.96e-34		IER5L	0.663	0		TASOR	-0.253	9.2e-43
GATA2	0.265	1.61e-39		GTF2I	-0.262	3.98e-32		STRADB	0.662	0		RWDD1	-0.287	9.23e-79
ATP5PB	0.309	1.61e-65		ATP5IF1	-0.344	4.09e-43		ENSSSCG00000031893	0.657	0		TIMP3	-0.29	9.36e-95
ILF3	0.365	1.61e-81		ADAM10	-0.502	4.17e-92		PRDM1	0.649	0		LRRC8A	-0.288	9.43e-42
MAP1LC3A	0.363	1.62e-35		SLC44A1	-0.263	4.18e-70		CREBRF	0.647	0		PHF20L1	-0.276	9.7e-45
SRPK1	0.32	1.62e-83		TPM4	-0.433	4.2e-88		ENSSSCG00000003112	0.646	0		BCAP31	-0.284	9.87e-85
RBPJ	0.29	1.64e-58		ANO6	-0.275	4.28e-33		BAG3	0.644	0		PBRM1	-0.41	1e-193
RILPL2	0.31	1.64e-95		COX7C	-0.416	4.35e-72		SEMA7A	0.641	0		LMAN2	-0.309	1.02e-138
ARNT	0.266	1.65e-29		PJA2	-0.284	4.4e-64		ENSSSCG00000005738	0.638	0		SLCO2A1	-0.496	1.03e-127
PDE4D	0.403	1.67e-71		CD320	-0.253	4.41e-68		UBE2A	0.638	0		KLF2	-0.752	1.03e-265
CD63	0.365	1.68e-33		PTPA	-0.349	4.41e-89		TMEM263	0.638	0		WDR83OS	-0.314	1.04e-130
HNRNPA3	0.624	1.68e-99		LAMTOR4	-0.343	4.44e-77		ANKFY1	0.637	0		LRP11	-0.553	1.06e-187
DAAM1	0.301	1.71e-47		SNRNP70	-0.292	4.45e-33		SARAF	0.633	0		FCGRT	-0.766	1.06e-290
NAA25	0.251	1.71e-73		FRYL	-0.278	4.49e-54		MCM7	0.631	0		WASHC4	-0.468	1.08e-247
ELOA	0.28	1.72e-77		COX8A	-0.278	4.5e-31		PPP2CA	0.63	0		ARHGDIB	-0.26	1.09e-133
ADRM1	0.366	1.76e-88		SEMA4C	-0.284	4.51e-44		MAPK6	0.627	0		CCDC25	-0.41	1.09e-173
ENSSSCG00000007743	0.531	1.83e-93		ENSSSCG00000000359	-0.253	4.51e-78		SERP1	0.622	0		OSBPL1A	-0.496	1.09e-193
MAPK1IP1L	0.252	1.85e-57		ATP2B1	-0.385	4.55e-49		ENSSSCG00000003042	0.617	0		ENSSSCG00000033720	-0.581	1.09e-244
TRIOBP	0.299	1.87e-82		CHD6	-0.299	4.64e-43		ENSSSCG00000024974	0.606	0		C12orf57	-0.456	1.1e-101
RAB1A	0.285	1.89e-64		ADGRF5	-0.45	4.75e-79		LCK	0.604	0		LYST	-0.363	1.13e-106
DHX15	0.311	1.91e-81		APPL1	-0.251	4.76e-28		TIPARP	0.599	0		TNKS2	-0.39	1.13e-135
JAK1	0.465	1.95e-60		JAG1	-0.299	4.8e-74		JAK2	0.597	0		ENSSSCG00000006418	-0.507	1.13e-155
ENSSSCG00000014414	0.348	1.95e-71		FILIP1	-0.417	4.82e-52		BCAR1	0.595	0		ENSSSCG00000014280	-0.313	1.16e-171
ENSSSCG00000034927	0.399	1.96e-83		KIFC3	-0.256	4.88e-77		KLHL15	0.595	0		CWF19L2	-0.349	1.17e-173
ROBO4	0.442	1.99e-51		ADARB1	-0.277	4.89e-92		GLA	0.59	0		GOLGB1	-0.494	1.19e-133
SLTM	0.278	2e-48		APOLD1	-0.364	4.91e-51		NFKBIB	0.589	0		PSMA4	-0.324	1.2e-106
CALM1	0.265	2.02e-64		EPS15	-0.266	4.95e-30		UBE2S	0.589	0		PXDN	-0.612	1.2e-267
CCNG2	0.277	2.02e-78		ELMSAN1	-0.251	4.96e-71		EDN1	0.584	0		PRR14L	-0.392	1.23e-167
TMED4	0.36	2.02e-91		HSPG2	-0.346	4.97e-37		MSX1	0.578	0		GHSR	-0.704	1.23e-248
PSMC1	0.322	2.04e-85		ARHGEF12	-0.338	5.01e-47		STMN1	0.577	0		CHRM2	-0.367	1.24e-146
TMEM129	0.327	2.05e-82		RGL2	-0.349	5.03e-41		ENSSSCG00000044542	0.576	0		DYSF	-0.536	1.24e-210
MYO5A	0.451	2.05e-92		USP8	-0.418	5.08e-93		WDR26	0.574	0		TINAGL1	-0.494	1.26e-219
RAB5A	0.349	2.06e-57		PELO	-0.403	5.13e-51		RNF122	0.567	0		UTRN	-0.523	1.27e-168
PGAM1	0.359	2.07e-95		CMTM8	-0.367	5.19e-49		NAMPT	0.565	0		COX6A1	-0.504	1.28e-132
MED31	0.281	2.08e-83		PCM1	-0.304	5.27e-28		IL4R	0.559	0		STOM	-0.606	1.3e-198
RYBP	0.474	2.09e-77		NIPBL	-0.251	5.34e-19		PHF23	0.551	0		SNX6	-0.36	1.31e-191
ENSSSCG00000013052	0.34	2.12e-64		ENSSSCG00000050244	-0.302	5.45e-33		IRF8	0.548	0		EMC10	-0.325	1.32e-102
PTGES3	0.316	2.13e-52		ENSSSCG00000005643	-0.269	5.46e-32		ENSSSCG00000012997	0.545	0		DAG1	-0.297	1.32e-132
ELF2	0.428	2.13e-87		NOP53	-0.289	5.52e-35		ENSSSCG00000021576	0.542	0		ENSSSCG00000027907	-0.493	1.33e-243
TNFRSF1B	0.368	2.14e-79		IPO11	-0.269	5.57e-31		ODC1	0.536	0		KIAA0513	-0.308	1.34e-183
TAF9	0.279	2.15e-88		SETX	-0.521	5.57e-95		IGF2BP2	0.533	0		VWF	-0.41	1.34e-191
CALU	0.365	2.16e-85		PLEC	-0.289	5.77e-33		CCNG2	0.533	0		IGFBP7	-0.82	1.35e-245
ARF1	0.544	2.16e-87		SMIM7	-0.344	6.02e-42		RND3	0.528	0		JUP	-0.324	1.37e-104
SMTN	0.275	2.18e-41		FRMD4B	-0.263	6.12e-23		CBX4	0.528	0		PAM	-0.474	1.37e-168
KLF7	0.344	2.2e-71		SLC12A7	-0.347	6.42e-68		NXT1	0.511	0		PDAP1	-0.297	1.38e-129
IFITM3	0.416	2.22e-37		RDX	-0.442	6.62e-88		FLAD1	0.5	0		PSMB9	-0.411	1.38e-177
GALNT1	0.266	2.22e-43		ENSSSCG00000002259	-0.494	6.65e-76		SLC10A1	0.497	0		ENSSSCG00000026960	-0.378	1.39e-220
TGFB1	0.544	2.24e-87		LRRC8A	-0.302	6.75e-32		RELB	0.474	0		ITCH	-0.301	1.42e-141
ALKBH5	0.279	2.25e-78		ANKRD44	-0.294	6.77e-81		EEF1A1	0.456	0		APLP2	-0.629	1.43e-204
LMAN1	0.315	2.26e-65		FCHO2	-0.371	6.79e-69		GSPT1	0.349	1.04e-95		RNF181	-0.35	1.44e-162
RPL34	0.315	2.3e-16		HYAL2	-0.462	6.8e-69		RASSF9	0.256	1.05e-51		ATP5IF1	-0.48	1.45e-198
RBM18	0.285	2.3e-74		CAPN2	-0.464	6.91e-96		RNF149	0.35	1.05e-94		ENSSSCG00000001455	-0.52	1.46e-300
ENSSSCG00000000377	0.375	2.34e-76		CDC42EP1	-0.303	6.92e-73		ENSSSCG00000005656	0.313	1.08e-29		SHISA5	-0.332	1.47e-131
QRICH1	0.282	2.38e-62		ENSSSCG00000033385	-0.26	6.98e-50		TCF4	0.38	1.09e-79		VSIR	-0.314	1.47e-180
ZBTB11	0.251	2.39e-72		RAPGEF4	-0.36	7e-45		RBBP6	0.305	1.16e-92		FUCA2	-0.413	1.49e-152
AGFG1	0.289	2.42e-67		NBEA	-0.326	7.1e-34		RPS28	0.405	1.19e-76		INPP5A	-0.367	1.5e-107
YAP1	0.284	2.42e-72		TEK	-0.359	7.1e-41		RBM3	0.374	1.2e-93		ISG12(A)	-0.479	1.51e-115
EIF2S2	0.433	2.47e-67		SH2D3C	-0.466	7.23e-91		RPL23A	0.41	1.25e-41		BIRC6	-0.507	1.52e-134
RFK	0.282	2.48e-96		RESF1	-0.265	7.24e-26		ENSSSCG00000014043	0.299	1.28e-95		TPR	-0.551	1.54e-183
DYNC1I2	0.266	2.5e-28		OSBPL1A	-0.365	7.3e-60		ACTG1	0.313	1.29e-18		CALML4	-0.428	1.57e-251
CLEC2B	0.349	2.51e-48		AIMP1	-0.286	7.4e-27		EEF1D	0.534	1.31e-92		SELENOP	-0.527	1.6e-128
SRP14	0.376	2.55e-78		SBSPON	-0.351	7.46e-46		HNRNPA2B1	0.288	1.33e-07		DDX46	-0.417	1.62e-113
TNFRSF1A	0.288	2.56e-47		ENSSSCG00000009851	-0.42	7.47e-97		YBX1	0.519	1.34e-69		CEP295	-0.322	1.62e-117
PRDX2	0.54	2.58e-94		ENSSSCG00000024791	-0.313	7.49e-41		C11orf58	0.418	1.35e-93		NMT1	-0.263	1.64e-114
RPL35A	0.335	2.61e-23		RABGAP1L	-0.262	7.61e-61		SSB	0.252	1.36e-39		ENSSSCG00000012119	-0.533	1.65e-200
ENSSSCG00000033653	0.328	2.66e-55		WDR83OS	-0.289	7.63e-42		SRRM1	0.261	1.37e-14		PROS1	-0.404	1.69e-107
ITGB1	0.466	2.67e-51		GOLIM4	-0.255	7.87e-38		CNOT4	0.333	1.4e-84		TMC6	-0.344	1.7e-159
PLEKHA3	0.284	2.68e-65		SLCO2A1	-0.283	7.91e-57		MANF	0.257	1.44e-82		MRPL33	-0.303	1.71e-130
STAT3	0.416	2.7e-75		AP2A2	-0.311	7.96e-49		PDGFB	0.431	1.47e-90		TUT4	-0.386	1.74e-103
RPN1	0.28	2.71e-55		KLF6	-0.259	8.02e-20		MIA3	0.309	1.53e-92		TMCO1	-0.66	1.74e-301
BAG1	0.264	2.76e-72		RBM5	-0.272	8.04e-24		PRPF4B	0.284	1.54e-55		SPINT2	-0.264	1.78e-113
RAP1B	0.472	2.76e-73		EDF1	-0.369	8.06e-95		TCF7L2	0.258	1.57e-97		PARK7	-0.475	1.82e-199
TFPI2	0.316	2.77e-43		CHD7	-0.304	8.09e-28		ENSSSCG00000015712	0.285	1.58e-94		ENSSSCG00000039807	-0.412	1.83e-152
YY1	0.487	2.78e-70		EGLN1	-0.374	8.1e-75		SAFB	0.274	1.62e-85		TLN1	-0.521	1.87e-179
PPP1CB	0.257	2.81e-56		SPTAN1	-0.37	8.17e-72		ENSSSCG00000001456	0.339	1.64e-25		ENSSSCG00000049524	-0.671	1.88e-208
GPR4	0.276	2.81e-57		PSMB10	-0.26	8.27e-52		PSMA2	0.327	1.67e-87		ZBTB22	-0.453	1.9e-179
RNF146	0.313	2.82e-94		CEP68	-0.276	8.27e-56		QKI	0.443	1.82e-58		LTBP1	-0.601	1.91e-215
WDR55	0.253	2.83e-96		PEAR1	-0.255	8.28e-62		ENSSSCG00000027746	0.32	1.82e-81		TTC3	-0.589	1.92e-191
DENR	0.261	2.88e-58		CIR1	-0.434	8.56e-88		CD9	0.527	1.84e-81		MTCH1	-0.727	2e-272
DYNC1LI2	0.257	2.92e-55		ENSSSCG00000038507	-0.291	8.57e-62		STRN3	0.25	1.93e-70		MIF	-0.576	2.01e-170
RHOA	0.573	2.92e-87		ENSSSCG00000004387	-0.257	8.57e-84		RAB5A	0.276	1.96e-61		ENSSSCG00000008222	-0.381	2.06e-117
RPL30	0.429	2.94e-44		PSMB9	-0.336	8.61e-46		TPM4	0.483	2.01e-72		FMO1	-0.301	2.08e-165
JMJD1C	0.418	2.97e-51		SECISBP2L	-0.314	8.74e-36		ARGLU1	0.427	2.03e-92		NDUFA13	-0.358	2.08e-186
MAX	0.31	2.99e-73		PARK7	-0.392	8.75e-67		N4BP1	0.418	2.05e-50		CAVIN2	-0.557	2.09e-143
HM13	0.257	3.03e-65		NCOA3	-0.367	8.8e-65		PRMT1	0.274	2.18e-78		NVL	-0.293	2.09e-202
ENSSSCG00000040889	0.349	3.03e-81		SLK	-0.385	8.81e-48		RB1CC1	0.266	2.2e-44		ITM2B	-0.595	2.09e-305
BRIX1	0.313	3.06e-86		MDM4	-0.329	8.84e-49		FOXO1	0.283	2.29e-86		APOA1	-0.256	2.11e-109
CDK6	0.256	3.07e-74		PDGFD	-0.331	8.86e-63		FERMT1	0.299	2.34e-74		ENSSSCG00000048263	-0.414	2.12e-220
C11orf58	0.406	3.1e-50		GCC2	-0.352	8.9e-65		ENSSSCG00000038507	0.586	2.38e-99		DGKZ	-0.409	2.13e-161
GRB2	0.304	3.11e-60		N4BP1	-0.327	8.93e-51		RRBP1	0.459	2.49e-94		VPS13C	-0.326	2.13e-181
HBP1	0.437	3.15e-96		PCDH17	-0.265	8.97e-16		ENG	0.492	2.52e-51		SETX	-0.553	2.16e-217
CRK	0.605	3.17e-88		LRRC70	-0.278	8.97e-32		ENSSSCG00000017509	0.338	2.52e-72		HS3ST1	-0.287	2.18e-121
CREBZF	0.36	3.17e-92		TAOK2	-0.452	8.98e-97		ERBIN	0.25	2.54e-53		CST3	-0.57	2.22e-179
ENSSSCG00000050627	0.3	3.19e-31		ATP13A3	-0.361	9.04e-07		TMED10	0.31	2.62e-38		ST3GAL4	-0.359	2.27e-165
ENSSSCG00000021560	0.256	3.21e-47		NUMA1	-0.414	9.06e-95		SELENOS	0.29	2.76e-80		SPCS2	-0.467	2.27e-257
C1orf52	0.281	3.22e-97		PRR14L	-0.336	9.15e-80		RPL29	0.455	2.78e-83		HSBP1	-0.431	2.32e-250
POLR1D	0.273	3.23e-48		SULF1	-0.278	9.16e-33		TMED5	0.321	2.82e-90		DCTN3	-0.254	2.36e-111
UBE2B	0.256	3.24e-33		PI16	-0.318	9.17e-62		ENSSSCG00000033497	0.346	2.84e-55		HLTF	-0.381	2.38e-129
CDH5	0.483	3.24e-53		C21orf91	-0.27	9.18e-24		SMC3	0.297	2.85e-63		ECE1	-0.454	2.39e-169
SNRPC	0.283	3.24e-80		USHBP1	-0.258	9.23e-44		SERBP1	0.253	2.95e-17		PPIG	-0.35	2.44e-107
MESD	0.28	3.3e-58		PRKD2	-0.29	9.28e-68		HNRNPA3	0.372	2.96e-41		CYBRD1	-0.293	2.46e-107
LUC7L3	0.331	3.33e-37		GSE1	-0.307	9.29e-63		RHOA	0.301	3.02e-26		SLC39A10	-0.532	2.5e-199
RNF11	0.327	3.42e-87		IRF2	-0.324	9.36e-74		HSPB1	0.429	3.17e-60		CFD	-0.567	2.51e-135
ENSSSCG00000032059	0.327	3.46e-61		PUM2	-0.359	9.48e-53		RPL36AL	0.49	3.18e-71		ENSSSCG00000034019	-0.519	2.54e-269
RHOB	0.399	3.55e-34		PIK3IP1	-0.301	9.63e-70		KIF5B	0.329	3.29e-52		AFAP1L1	-0.528	2.57e-263
ABHD17B	0.256	3.57e-65		FUCA2	-0.416	9.76e-75		NUDT3	0.358	3.31e-70		FKBP9	-0.271	2.58e-108
ENSSSCG00000005247	0.257	3.57e-71		SMARCA2	-0.323	9.91e-64		PGRMC1	0.272	3.55e-85		ENSSSCG00000024144	-0.28	2.59e-149
POLR2D	0.273	3.57e-73		MAP3K11	-0.291	9.93e-63		PRDX2	0.281	3.56e-63		ENSSSCG00000041446	-0.31	2.61e-122
ELL	0.253	3.66e-78		TMEM50A	-0.428	9.95e-81		RBM39	0.541	3.56e-94		UQCR10	-0.298	2.61e-177
IL11	0.283	3.71e-95		SPRY1	-0.77	1e-186		ENSSSCG00000016737	0.378	3.58e-19		CCDC50	-0.573	2.61e-210
SRSF5	0.346	3.78e-61		ENSSSCG00000026960	-0.446	1e-228		ENSSSCG00000029251	0.298	3.6e-87		COMMD6	-0.289	2.62e-112
LARP4	0.27	3.81e-64		IL15	-0.437	1.02e-158		RPL35	0.401	3.76e-92		ENSSSCG00000020790	-0.341	2.64e-135
SRSF10	0.496	3.84e-69		RRAS	-0.747	1.02e-220		SPAG9	0.337	3.84e-60		AKR1A1	-0.284	2.7e-122
IFFO2	0.267	3.84e-94		MDK	-0.892	1.02e-284		PAFAH1B1	0.259	3.98e-56		XRN1	-0.402	2.71e-103
ENSSSCG00000031838	0.382	3.85e-82		CLSTN1	-0.492	1.03e-238		RTRAF	0.257	4.08e-80		COPB2	-0.262	2.74e-113
SERINC3	0.501	3.85e-89		ABCA1	-0.409	1.04e-110		S100A10	0.49	4.27e-94		GPR182	-0.254	2.75e-125
TRIR	0.281	3.87e-47		ENSSSCG00000012119	-0.479	1.04e-149		PPP2R2A	0.274	4.42e-84		NDUFA1	-0.342	2.75e-158
EIF2AK3	0.253	3.9e-73		ADAMTS1	-0.654	1.05e-107		LUZP1	0.498	4.51e-61		AMOTL1	-0.497	2.79e-134
MPHOSPH10	0.264	3.91e-76		PLCD1	-0.485	1.05e-291		LRRC32	0.331	4.81e-98		FAM53B	-0.309	2.83e-115
ENSSSCG00000007692	0.32	3.97e-72		ENSSSCG00000000905	-0.414	1.06e-149		HDAC7	0.338	4.86e-66		LDB2	-0.539	2.85e-146
RBM39	0.577	4e-78		SEMA6D	-0.299	1.09e-206		MAPRE2	0.351	4.98e-91		FKBP5	-0.577	2.87e-215
PPP1R15B	0.292	4.01e-86		RAPGEF2	-0.4	1.1e-111		ATP1A1	0.266	5.05e-49		CD93	-0.253	2.93e-181
TMEM208	0.286	4.02e-60		ATRX	-0.654	1.1e-136		TXNL1	0.261	5.38e-76		HTRA1	-0.488	2.93e-266
KIF5B	0.319	4.04e-31		FAM210B	-0.271	1.11e-114		CRK	0.479	5.46e-60		RCSD1	-0.493	2.94e-192
FAM32A	0.379	4.04e-82		ERAP2	-0.291	1.11e-153		ZFP36L2	0.523	5.6e-89		KIAA1109	-0.331	2.95e-150
GNB2	0.341	4.07e-43		FRMD3	-0.629	1.13e-296		MAP2K3	0.298	5.62e-70		CETN3	-0.374	2.96e-212
MAPRE2	0.258	4.08e-34		CALCOCO2	-0.859	1.16e-293		PRDX1	0.296	5.63e-87		COL4A2	-0.669	3.04e-234
DYRK3	0.443	4.09e-82		PHF21A	-0.26	1.17e-101		WBP2	0.294	5.68e-72		CD36	-0.375	3.1e-242
VDAC1	0.316	4.22e-89		ENSSSCG00000028092	-0.532	1.2e-126		PEA15	0.328	5.68e-86		TBC1D9B	-0.314	3.11e-101
SRM	0.293	4.26e-98		GPR182	-0.374	1.2e-223		DEK	0.311	5.81e-24		BOD1L1	-0.5	3.12e-167
UVRAG	0.29	4.3e-53		PPP1R21	-0.351	1.21e-147		EEF2	0.334	5.92e-19		LRPAP1	-0.307	3.13e-115
ENSSSCG00000037143	0.368	4.31e-74		SEMA3G	-0.425	1.21e-152		GNB2	0.3	6.01e-57		MFNG	-0.274	3.15e-108
IRF7	0.254	4.42e-91		FLT1	-0.817	1.21e-251		ADAM9	0.255	6.37e-95		CIITA	-0.383	3.17e-261
CYP51A1	0.266	4.44e-81		SLA-DQB1	-0.324	1.22e-107		ST8SIA4	0.271	6.5e-73		PCDH7	-0.416	3.19e-132
RHOJ	0.334	4.46e-88		DOCK6	-0.43	1.22e-214		PPP1CB	0.253	6.58e-87		ANO6	-0.629	3.19e-205
ZMIZ1	0.283	4.52e-34		ZBTB38	-0.694	1.22e-260		TLNRD1	0.342	6.61e-89		ENSSSCG00000040118	-0.339	3.35e-110
SMARCA5	0.379	4.53e-58		TSPAN9	-0.368	1.23e-123		SEC61B	0.27	6.69e-77		CTSD	-0.574	3.36e-177
IMPAD1	0.353	4.56e-97		VPS36	-0.577	1.24e-169		RPS6KA3	0.32	6.96e-90		CAST	-0.366	3.53e-125
ENSSSCG00000014565	0.41	4.59e-40		HDAC7	-0.686	1.24e-186		DAAM1	0.301	7.24e-86		TM4SF18	-0.414	3.55e-137
MT-ND4	0.37	4.62e-29		CHRM2	-0.474	1.24e-241		ANXA1	0.414	7.35e-75		ADAM10	-0.52	3.57e-131
RASA2	0.317	4.65e-93		ENSSSCG00000006510	-0.333	1.26e-132		PCBP2	0.271	7.41e-61		SMC1A	-0.405	3.58e-108
MAGOH	0.269	4.66e-74		VPS8	-0.257	1.28e-147		VEZF1	0.304	7.44e-87		ZNF518A	-0.281	3.61e-191
ORAI1	0.289	4.67e-84		GRK2	-0.406	1.29e-119		ENSSSCG00000003520	0.256	7.5e-20		ENSSSCG00000017177	-0.41	3.63e-237
UBE2L6	0.288	4.74e-87		PKD2	-0.322	1.29e-220		RSBN1	0.272	7.63e-82		SMIM19	-0.256	3.65e-146
FAM98A	0.261	4.77e-80		ABLIM1	-0.334	1.31e-171		SRSF5	0.267	7.69e-79		LTBP4	-0.418	3.69e-231
MLKL	0.306	4.86e-98		PTPRG	-0.724	1.31e-218		BZW1	0.348	7.77e-66		S1PR1	-0.322	3.76e-119
METAP2	0.291	4.89e-51		LTBP4	-0.51	1.32e-132		RPS11	0.268	8.04e-30		RASAL2	-0.445	3.8e-100
MYC	0.254	4.91e-85		EXOC1	-0.265	1.33e-109		HSPA9	0.263	8.18e-92		ENSSSCG00000023324	-0.483	3.8e-136
DEK	0.348	4.95e-25		FMNL2	-0.517	1.35e-188		ARPC5L	0.265	8.22e-97		CIR1	-0.464	3.82e-233
DHRS3	0.503	4.99e-68		BSDC1	-0.263	1.36e-101		RELA	0.277	8.31e-76		VPS36	-0.445	3.85e-117
RALA	0.415	5.01e-62		IQSEC1	-0.284	1.36e-147		CHD3	0.297	8.51e-82		BCAS3	-0.254	3.91e-136
ERBB3	0.412	5.08e-36		RAPGEF3	-0.501	1.36e-225		PCDH17	0.289	8.62e-82		PIK3C2B	-0.483	3.91e-179
EIF3J	0.446	5.09e-90		EMID1	-0.381	1.36e-227		ENSSSCG00000040879	0.321	8.74e-33		TNFAIP1	-0.274	3.95e-128
TSKU	0.279	5.17e-98		TPST2	-0.251	1.37e-124		GNAI2	0.343	9e-32		ENSSSCG00000028092	-0.589	3.99e-161
TIFA	0.253	5.2e-77		ENSSSCG00000017177	-0.34	1.37e-210		VASP	0.255	9.47e-45		MDM4	-0.336	4.01e-141
DNAJC3	0.345	5.24e-58		SHE	-0.427	1.38e-161		NR3C1	0.364	9.49e-98		FUT8	-0.28	4.03e-109
KDM6B	0.325	5.31e-97		EML2	-0.251	1.39e-106		BRD4	0.359	9.67e-73		ISCU	-0.304	4.05e-152
TPM3	0.512	5.54e-63		RPS8	-0.402	1.39e-210		RPL38	0.273	9.68e-05		CDH5	-0.635	4.07e-196
ATP6AP2	0.354	5.65e-96		F8	-0.538	1.4e-269		FAM167B	0.419	9.86e-54		IQGAP1	-0.385	4.08e-123
ATP5MC1	0.262	5.7e-41		CCM2L	-0.468	1.4e-302		ENSSSCG00000000405	0.295	9.87e-74		BCAP29	-0.382	4.11e-178
FBXW11	0.351	5.79e-70		ZBTB46	-0.316	1.43e-154		SGK1	0.317	9.96e-23		DDOST	-0.353	4.14e-109
TAF5L	0.285	5.8e-91		STARD8	-0.687	1.44e-305		PFN1	0.38	1.01e-100		ATRX	-0.628	4.14e-188
CLINT1	0.282	5.82e-67		DYNLT3	-0.374	1.46e-101		HK1	0.732	1.01e-199		CALCRL	-0.344	4.15e-138
EIF3G	0.274	5.85e-29		ENSSSCG00000012061	-0.298	1.46e-193		PPP1R15B	0.363	1.02e-178		TMBIM6	-0.657	4.17e-254
CHD1	0.394	5.85e-57		PLCB1	-0.788	1.46e-286		ENSSSCG00000013361	0.502	1.02e-297		MPPED2	-0.509	4.25e-171
RELA	0.386	5.85e-72		SLPI	-0.685	1.47e-137		KIT	0.357	1.03e-152		LAMTOR1	-0.265	4.29e-105
RBM14	0.366	5.87e-85		HLX	-0.535	1.49e-118		CBL	0.369	1.03e-177		ENSSSCG00000040410	-0.564	4.3e-176
BUD31	0.311	5.88e-89		ICA1	-0.347	1.49e-234		MT-ND4L	0.429	1.03e-185		ZNF638	-0.35	4.35e-117
GPBP1	0.438	5.91e-82		ZBTB20	-0.307	1.5e-130		ABHD5	0.403	1.03e-256		KTN1	-0.624	4.38e-198
RTRAF	0.315	5.92e-65		XPC	-0.284	1.5e-130		CITED2	0.304	1.04e-189		NDUFA8	-0.298	4.43e-137
ANKFY1	0.357	6.04e-87		MINDY2	-0.411	1.51e-126		ALYREF	0.48	1.04e-196		CDC42BPA	-0.416	4.49e-101
GJC1	0.293	6.1e-31		ETS1	-0.475	1.51e-133		STX12	0.296	1.05e-120		RABAC1	-0.536	4.49e-158
NUTF2	0.318	6.15e-93		TMTC1	-0.579	1.52e-170		RAB11A	0.454	1.06e-124		SEPTIN2	-0.362	4.55e-146
RRP15	0.359	6.18e-99		PEAK1	-0.388	1.54e-136		EIF3H	0.471	1.06e-129		ENSSSCG00000015853	-0.37	4.56e-140
PNRC2	0.491	6.23e-83		RNASEH2C	-0.37	1.56e-248		RPL7L1	0.298	1.07e-119		DGKB	-0.48	4.61e-178
SSR4	0.312	6.35e-58		SLA-DMB	-0.62	1.57e-228		PRNP	0.312	1.07e-161		ELOB	-0.679	4.63e-240
SAFB	0.438	6.36e-96		TNRC18	-0.397	1.58e-127		RPS6	0.612	1.07e-172		ESAM	-0.639	4.64e-213
WAC	0.295	6.38e-62		SEMA6A	-0.253	1.59e-156		SEC24A	0.348	1.07e-211		MSMB	-0.436	4.65e-114
PSMB1	0.286	6.41e-41		GHSR	-0.921	1.59e-274		CDK17	0.463	1.07e-222		MAT2B	-0.299	4.65e-167
UBALD2	0.297	6.41e-71		PCDH7	-0.379	1.61e-141		DNAJB1	0.535	1.07e-304		TOR4A	-0.421	4.68e-201
ENSSSCG00000013155	0.389	6.45e-63		PKN1	-0.494	1.68e-209		MED4	0.346	1.08e-150		CASKIN2	-0.637	4.68e-226
PRKAR1A	0.476	6.49e-64		ARAP3	-0.607	1.69e-147		CDC34	0.28	1.08e-153		RPS27L	-0.393	4.69e-139
SCAND1	0.373	6.55e-72		ZMYND8	-0.552	1.69e-197		RYBP	0.77	1.08e-260		ENSSSCG00000034230	-0.526	4.82e-173
ENSSSCG00000025499	0.391	6.66e-43		ENSSSCG00000007982	-0.3	1.7e-165		KLF6	0.562	1.09e-170		GRB14	-0.585	4.89e-225
VASP	0.378	6.69e-48		TNRC6B	-0.457	1.71e-107		ILF2	0.258	1.11e-110		PSMA6	-0.576	4.9e-183
EIF4A2	0.57	6.71e-80		RABAC1	-0.53	1.72e-105		TSPAN3	0.359	1.11e-120		ENSSSCG00000021560	-0.267	4.91e-107
ENSSSCG00000000097	0.261	6.78e-58		ST3GAL4	-0.362	1.72e-161		RACK1	0.716	1.11e-228		ENSSSCG00000033089	-0.257	4.99e-131
HNRNPD	0.319	6.82e-48		CORO1B	-0.354	1.72e-193		SMARCA1	0.333	1.14e-195		ZBTB46	-0.321	5e-190
ENSSSCG00000031462	0.325	6.89e-92		MTSS1	-0.519	1.76e-148		TAPT1	0.346	1.15e-156		CPNE3	-0.528	5.03e-194
CEBPZ	0.268	6.94e-51		ENSSSCG00000048263	-0.457	1.78e-103		EIF4EBP1	0.266	1.16e-128		ZMYND8	-0.345	5.08e-129
UFD1	0.347	6.95e-86		GAS6	-0.283	1.8e-112		OSER1	0.38	1.17e-232		NDUFB3	-0.267	5.12e-109
GMNN	0.34	6.98e-99		ADD1	-0.264	1.81e-100		GMNN	0.321	1.19e-158		MPZL1	-0.318	5.13e-154
TSPAN31	0.32	7.28e-92		APLP2	-0.697	1.83e-182		CAMTA1	0.386	1.19e-206		NEDD8	-0.348	5.18e-148
ELF1	0.465	7.31e-95		ENSSSCG00000001455	-0.424	1.85e-161		MLLT11	0.325	1.22e-204		ZBTB38	-0.436	5.24e-123
RPL23A	0.357	7.34e-28		VSIR	-0.424	1.86e-290		ENSSSCG00000031381	0.421	1.23e-105		SLC12A7	-0.334	5.27e-115
P4HB	0.312	7.37e-71		IRF3	-0.369	1.89e-167		CALM1	0.346	1.23e-118		COX17	-0.372	5.33e-153
ENSSSCG00000001414	0.329	7.45e-61		HDAC5	-0.325	1.94e-118		MAP4K4	0.547	1.24e-232		ENSSSCG00000004082	-0.566	5.35e-167
C16orf72	0.258	7.45e-67		NFIA	-0.338	1.96e-215		GNG10	0.598	1.24e-260		LIMS2	-0.275	5.42e-178
RPS17	0.538	7.45e-74		CARD10	-0.284	2.05e-159		PCF11	0.397	1.27e-126		GCC2	-0.383	5.71e-176
RPL5	0.378	7.52e-27		HERC1	-0.579	2.05e-177		TRIP10	0.386	1.27e-201		PHF3	-0.321	5.74e-101
HERPUD1	0.303	7.6e-19		DLC1	-0.575	2.08e-163		AMD1	0.768	1.27e-286		ARPC4	-0.325	5.74e-118
HNRNPU	0.309	7.62e-23		ENSSSCG00000029771	-0.411	2.08e-190		ACOT13	0.28	1.28e-104		NKTR	-0.429	5.8e-137
EML4	0.291	7.62e-61		RPS28	-0.386	2.11e-152		VEZT	0.328	1.29e-157		RIMS2	-0.654	5.84e-186
SH3GLB1	0.319	7.65e-38		ENSSSCG00000032003	-0.497	2.17e-152		THOC6	0.39	1.31e-219		COL12A1	-0.549	5.94e-127
POLR2F	0.349	7.74e-55		INPP5A	-0.496	2.18e-190		NAP1L1	0.558	1.33e-151		PCMTD1	-0.469	6.02e-118
TLE3	0.32	7.83e-86		BRD3	-0.374	2.19e-121		B3GNT2	0.282	1.33e-171		SEC11A	-0.368	6.02e-175
ATF6	0.336	7.84e-70		TSPAN4	-0.316	2.29e-125		KIAA1191	0.519	1.33e-289		REEP3	-0.427	6.1e-121
RPIA	0.356	7.91e-81		MYL12A	-0.428	2.29e-128		KPNB1	0.445	1.34e-124		RPN2	-0.492	6.27e-259
NDUFB9	0.423	7.91e-89		ST3GAL5	-0.256	2.29e-187		ENSSSCG00000034709	0.633	1.34e-148		NSD1	-0.378	6.34e-147
FUS	0.525	8.03e-90		TOR4A	-0.5	2.31e-168		PHF13	0.465	1.36e-300		EFNB1	-0.572	6.35e-171
RPL37A	0.323	8.04e-28		ENSSSCG00000007098	-0.298	2.31e-172		SRSF3	0.491	1.37e-131		NCALD	-0.37	6.36e-114
ENSSSCG00000044051	0.294	8.11e-24		TAL1	-0.427	2.32e-168		AHI1	0.376	1.37e-153		PDGFD	-0.451	6.4e-137
B4GALT5	0.25	8.14e-81		SPINT2	-0.524	2.34e-278		DDX23	0.327	1.38e-135		LAMC1	-0.321	6.43e-110
SUMO1	0.266	8.16e-49		MYCBP2	-0.58	2.38e-125		KDSR	0.528	1.38e-210		ENSSSCG00000009851	-0.403	6.44e-174
ECM1	0.263	8.3e-58		DNMT3A	-0.362	2.4e-185		NUP153	0.305	1.4e-150		COX5B	-0.559	6.47e-177
ID2	0.404	8.54e-34		KMT2C	-0.591	2.41e-140		TIFA	0.316	1.4e-167		LIMCH1	-0.626	6.53e-192
ENSSSCG00000025928	0.512	8.55e-93		ENSSSCG00000014280	-0.308	2.42e-103		RARA	0.402	1.4e-185		PLCB1	-0.519	6.6e-126
MARCHF5	0.284	8.69e-91		ENSSSCG00000004081	-0.578	2.42e-127		SFPQ	0.912	1.4e-300		CTSB	-0.342	6.81e-147
SAFB2	0.404	8.77e-87		MPZL1	-0.303	2.44e-124		NANS	0.487	1.41e-150		NOL7	-0.423	6.83e-143
HIGD1A	0.255	8.8e-73		PER1	-0.523	2.45e-109		FBXO33	0.467	1.42e-286		ARAP3	-0.536	6.86e-188
ENSSSCG00000022246	0.26	8.86e-82		MAN1C1	-0.304	2.45e-148		SERTAD3	0.302	1.43e-169		ERH	-0.301	6.93e-114
HHEX	0.294	8.92e-84		CCDC93	-0.299	2.47e-100		NDRG1	0.383	1.43e-217		CLSTN1	-0.392	6.99e-218
CMPK1	0.276	8.94e-79		C6orf89	-0.263	2.47e-112		CLK4	0.32	1.44e-156		ENSSSCG00000038825	-0.311	7.08e-134
EGR1	0.29	8.96e-65		SIPA1	-0.436	2.5e-138		ENSSSCG00000013155	0.55	1.45e-187		USP8	-0.454	7.12e-249
DUSP1	0.584	8.97e-72		ENSSSCG00000015853	-0.392	2.55e-125		NR2F6	0.395	1.45e-235		NDUFB7	-0.409	7.26e-248
MYLIP	0.354	8.98e-81		AKR1A1	-0.403	2.56e-104		NUP50	0.551	1.45e-261		GJA4	-0.43	7.41e-131
NANS	0.349	8.99e-52		LTBP1	-0.395	2.57e-101		HSPE1	0.393	1.46e-148		SLC8A1	-0.276	7.43e-145
PHAX	0.273	9.03e-69		TPRA1	-0.303	2.57e-169		IPMK	0.322	1.46e-187		SON	-0.338	7.47e-184
RPL4	0.437	9.1e-45		SON	-0.458	2.57e-188		C16orf72	0.491	1.46e-239		ENSSSCG00000033262	-0.266	7.47e-304
GTF2B	0.274	9.16e-87		LPCAT4	-0.281	2.59e-172		DAB2	0.508	1.47e-149		MBTPS1	-0.353	7.51e-136
ELOC	0.267	9.17e-71		STAB1	-0.316	2.63e-133		CCL2	0.613	1.47e-242		CLPTM1L	-0.268	7.55e-125
RFTN2	0.325	9.18e-88		SF3B1	-0.481	2.65e-118		IFFO2	0.457	1.47e-298		DIPK1B	-0.435	7.56e-162
TMBIM1	0.267	9.22e-42		FAM53B	-0.399	2.66e-157		ENY2	0.304	1.48e-127		ADGRF5	-0.654	7.57e-220
TMEM184B	0.259	9.23e-57		AKAP9	-0.561	2.68e-106		MXI1	0.275	1.48e-134		MARCKS	-0.505	7.67e-172
PPP2CB	0.361	9.23e-99		MCRIP1	-0.459	2.7e-150		NFAT5	0.387	1.48e-140		RNASEH2C	-0.255	7.7e-119
PDIA6	0.461	9.25e-96		TIE1	-0.828	2.77e-254		RASSF8	0.331	1.5e-153		PSMB1	-0.39	7.71e-175
FNBP4	0.361	9.27e-53		ATL3	-0.33	2.78e-132		BACH1	0.591	1.5e-268		ENPP4	-0.509	7.91e-129
CD151	0.406	9.32e-58		STOX2	-0.256	2.8e-162		ZKSCAN1	0.449	1.52e-147		SNRNP200	-0.304	8.02e-100
HSP90B1	0.529	9.42e-67		ERP29	-0.282	2.83e-127		SQSTM1	0.649	1.53e-249		ATL3	-0.315	8.04e-155
OSMR	0.305	9.55e-90		TSPAN2	-0.26	2.83e-161		SRSF6	0.424	1.54e-176		MYCBP2	-0.495	8.06e-117
RPL36A-HNRNPH2	0.348	9.69e-32		RBMS1	-0.795	2.83e-235		PPP1R12A	0.614	1.54e-181		BCAM	-0.566	8.13e-289
ENSSSCG00000028414	0.389	9.75e-87		SLC16A10	-0.274	2.85e-111		SLC20A1	0.494	1.54e-289		NOTCH4	-0.436	8.2e-128
WDR26	0.317	9.81e-95		C20orf194	-0.289	2.87e-134		MARK3	0.261	1.55e-111		ENSSSCG00000027840	-0.348	8.21e-166
ANXA5	0.382	9.86e-46		ZNF518A	-0.345	2.89e-163		ENSSSCG00000006559	0.259	1.6e-112		PHF14	-0.302	8.24e-140
THAP11	0.267	9.9e-85		PPP3CA	-0.809	2.9e-235		RPS21	0.616	1.6e-155		ENSSSCG00000032003	-0.477	8.5e-150
PPP4R2	0.294	9.91e-64		VPS13A	-0.476	2.96e-112		ENSSSCG00000034448	0.574	1.6e-261		AOPEP	-0.354	8.55e-128
CYTH1	0.278	9.93e-61		CTSD	-0.554	2.98e-130		RPL26	0.587	1.6e-265		EPC1	-0.408	8.55e-145
TCP1	0.8	1.01e-286		HLA-DRA	-0.37	3.02e-147		CCNYL1	0.448	1.61e-167		ITGB5	-0.471	8.61e-178
FTSJ3	0.375	1.02e-140		TSC2	-0.263	3.03e-150		MSL1	0.505	1.62e-284		TM9SF3	-0.414	8.63e-151
HNRNPA2B1	0.656	1.03e-137		DDX17	-0.92	3.04e-284		CDR2L	0.404	1.63e-270		CHPF2	-0.281	8.67e-148
RNF122	0.34	1.03e-137		KIAA1109	-0.431	3.05e-216		PDE4A	0.45	1.63e-271		LAMP1	-0.524	8.71e-158
RCAN1	0.452	1.03e-174		ENSSSCG00000041656	-0.597	3.06e-229		GRB2	0.508	1.64e-202		APLNR	-0.331	8.78e-214
PRNP	0.593	1.03e-230		PHLDB2	-0.348	3.12e-114		YTHDF2	0.507	1.64e-208		ARHGEF15	-0.485	8.8e-217
BTF3	0.672	1.04e-119		ENSSSCG00000037566	-0.357	3.12e-130		PI4K2B	0.335	1.65e-163		MCC	-0.536	8.83e-198
ARPC2	0.599	1.04e-125		SNX6	-0.389	3.13e-110		TMEM19	0.438	1.67e-177		ENDOD1	-0.469	8.84e-186
PAK1IP1	0.368	1.04e-126		BBX	-0.52	3.14e-172		FERMT2	0.549	1.69e-103		CCM2L	-0.432	8.85e-241
DDX3X	0.837	1.04e-189		GNAQ	-0.503	3.15e-181		CD40	0.286	1.7e-113		GRN	-0.485	8.93e-123
PKIG	0.655	1.04e-228		SPAG8	-0.289	3.2e-150		UBN1	0.337	1.7e-144		PTPA	-0.294	9.06e-116
KLF10	0.824	1.05e-250		GLG1	-0.445	3.23e-134		SLC36A4	0.388	1.7e-238		CCND3	-0.45	9.06e-164
TMED2	0.41	1.06e-104		BAZ2B	-0.725	3.24e-248		PCBP1	0.411	1.71e-111		RAPGEF3	-0.348	9.09e-117
DNAJA2	0.528	1.06e-141		ENSSSCG00000033497	-0.527	3.27e-103		INTS6	0.295	1.71e-155		GLG1	-0.422	9.13e-175
PSMC4	0.451	1.06e-143		ATP2A3	-0.259	3.29e-132		FJX1	0.268	1.71e-155		AKAP9	-0.779	9.17e-268
MRPL17	0.829	1.06e-237		ENPP4	-0.448	3.3e-124		TMEM65	0.296	1.74e-154		SUPT20H	-0.316	9.23e-129
VCAM1	0.84	1.06e-252		FLI1	-0.658	3.37e-184		DNAJA2	0.423	1.74e-172		NBR1	-0.287	9.51e-111
TMEM19	0.451	1.07e-110		GRB14	-0.528	3.46e-282		HES1	0.767	1.75e-247		HP1BP3	-0.44	9.64e-123
SNRPD1	0.472	1.07e-134		UTRN	-0.554	3.48e-108		FOSL1	0.387	1.75e-281		SEL1L	-0.342	9.78e-156
RPL3	0.787	1.07e-208		LGALS3BP	-0.276	3.49e-125		ENSSSCG00000020830	0.732	1.78e-210		ENSSSCG00000001927	-0.251	9.88e-129
SLC25A6	0.945	1.07e-272		PCDH12	-0.484	3.49e-244		TLE3	0.482	1.78e-217		CAVIN3	-0.533	9.99e-222
PSMD8	0.821	1.07e-278		CETN3	-0.452	3.5e-247		RPL21	0.719	1.79e-192
SEMA3F	0.433	1.08e-149		PLXND1	-0.461	3.52e-184		MYLIP	0.529	1.79e-257
RPL11	0.549	1.08e-164		EML1	-0.257	3.55e-148		YAF2	0.545	1.8e-270
MBD2	0.755	1.09e-242		RASGRF2	-0.345	3.6e-162		ANKRD12	0.712	1.81e-186
TFG	0.356	1.1e-106		LRRC45	-0.261	3.6e-163		ENSSSCG00000038506	0.701	1.81e-198
GABARAPL1	0.516	1.1e-111		PAM	-0.45	3.65e-133		UBXN1	0.61	1.83e-274
RAI14	0.475	1.1e-152		LIMA1	-0.7	3.71e-187		DCUN1D3	0.286	1.84e-184
EEF1A1	0.374	1.1e-159		ARHGEF6	-0.262	3.73e-155		SLCO4A1	0.312	1.84e-203
NAMPT	0.597	1.1e-199		NOTCH4	-0.59	3.75e-146		ENSSSCG00000032242	0.402	1.85e-263
ENSSSCG00000033700	0.45	1.11e-165		LRP11	-0.621	3.77e-227		MTA2	0.285	1.88e-126
ATF1	0.319	1.12e-119		ENSSSCG00000023324	-0.569	3.82e-129		PPP2CB	0.358	1.9e-164
SOD1	0.582	1.12e-131		CPNE3	-0.54	3.84e-130		KAZN	0.374	1.9e-240
ENSSSCG00000003112	0.373	1.12e-147		EFNB2	-0.731	3.89e-188		AGO1	0.308	1.91e-110
EDN1	0.627	1.12e-230		ASS1	-0.334	3.9e-114		RAN	0.605	1.91e-219
COQ10B	0.781	1.12e-293		LMO7	-0.306	3.91e-193		ENSSSCG00000017626	0.462	1.93e-214
KAZN	0.291	1.13e-103		GASK1B	-0.255	4.01e-174		EIF3A	0.686	1.93e-272
RCL1	0.303	1.13e-115		MCC	-0.523	4.04e-158		RBM8A	0.396	1.94e-104
IMP3	0.462	1.13e-171		NBR1	-0.377	4.05e-111		BST2	0.265	1.94e-110
ENSSSCG00000018050	0.463	1.14e-142		LRRK1	-0.283	4.06e-118		HSPA13	0.285	1.97e-155
NABP1	0.476	1.14e-203		SLC16A7	-0.536	4.07e-238		SRSF10	0.439	1.98e-100
OAZ1	0.898	1.15e-230		PXDN	-0.469	4.12e-146		LASP1	0.284	1.99e-100
ITGA2	0.723	1.15e-268		ENSSSCG00000015814	-0.504	4.16e-105		USP15	0.521	1.99e-172
ENG	0.604	1.16e-121		SMIM19	-0.275	4.16e-118		PNN	0.531	2.02e-128
MAP2K3	0.636	1.16e-133		PPP6R2	-0.351	4.18e-122		EFNA1	0.532	2.02e-135
CNEP1R1	0.386	1.17e-143		ZCCHC17	-0.28	4.31e-115		ENSSSCG00000011676	0.315	2.02e-158
SYNCRIP	0.777	1.17e-187		VPS13C	-0.334	4.35e-109		TUBB6	0.444	2.02e-276
PSMB3	0.709	1.17e-235		CAVIN3	-0.553	4.35e-124		UOX	0.509	2.03e-109
FAM110A	0.455	1.18e-162		EPB41	-0.408	4.35e-160		KLF10	0.578	2.03e-185
FAM111A	0.574	1.19e-149		SLA-DOA	-0.407	4.37e-178		RASA2	0.383	2.04e-210
TSC22D2	0.611	1.19e-240		HSF4	-0.282	4.45e-152		MGAT4A	0.336	2.07e-106
MT-ND6	0.369	1.2e-139		UBTF	-0.429	4.53e-152		HOXB9	0.378	2.07e-226
GTPBP4	0.317	1.21e-102		NCOA7	-0.478	4.56e-146		STK40	0.448	2.08e-269
ENSSSCG00000033019	0.742	1.21e-157		SCP2	-0.431	4.56e-177		UNC5B	0.447	2.09e-173
ARPC5L	0.646	1.22e-210		TUBGCP2	-0.34	4.62e-125		ENSSSCG00000010203	0.757	2.09e-257
RAB5C	0.516	1.23e-136		MAPK12	-0.531	4.66e-264		ORAI1	0.285	2.1e-142
HEXIM1	0.409	1.23e-161		ENSSSCG00000038991	-0.586	4.72e-257		CHSY1	0.349	2.11e-195
UBXN1	0.614	1.23e-168		AGRN	-0.413	4.75e-111		NFKB2	0.477	2.15e-299
RPS4X	0.769	1.23e-175		STAP1	-0.287	4.76e-183		DHX9	0.727	2.16e-275
PNO1	0.526	1.23e-188		ZBTB16	-0.396	4.81e-223		ENSSSCG00000025928	0.651	2.18e-215
SNX18	0.613	1.23e-235		JUP	-0.461	4.82e-154		SLC35B2	0.293	2.19e-173
PELI1	0.569	1.24e-133		PTPN18	-0.441	4.9e-119		AFF1	0.586	2.27e-228
SEC61A1	0.51	1.24e-147		PCMTD1	-0.537	4.92e-144		RALA	0.849	2.28e-302
ENSSSCG00000010158	0.525	1.24e-148		SLA-DMA	-0.475	4.92e-190		YWHAZ	0.513	2.29e-105
PSMA3	0.632	1.24e-164		HDAC10	-0.334	4.94e-214		CTSV	0.541	2.31e-126
RSL24D1	0.47	1.25e-146		ENSSSCG00000015645	-0.483	4.96e-240		ENSSSCG00000014351	0.587	2.31e-190
HYPK	0.726	1.26e-199		FOXS1	-0.254	5.1e-172		DNAJB4	0.458	2.31e-259
ENSSSCG00000015730	0.718	1.26e-211		INPP4B	-0.329	5.16e-186		TMEM9B	0.281	2.32e-106
SRSF3	0.644	1.27e-136		CSRP1	-0.64	5.21e-205		ENSSSCG00000032525	0.362	2.32e-181
KLHL15	0.472	1.27e-176		INPP5K	-0.332	5.26e-202		KMT2E	0.649	2.33e-164
UNC5B	0.573	1.28e-158		ENSSSCG00000041446	-0.479	5.28e-283		ZNF207	0.484	2.33e-240
ANXA1	0.966	1.28e-233		ENSSSCG00000017783	-0.386	5.3e-116		ENSSSCG00000032436	0.79	2.36e-220
FTSJ1	0.327	1.29e-112		FKBP8	-0.272	5.44e-122		PMEPA1	0.537	2.38e-278
VDAC2	0.625	1.29e-178		CCND1	-0.618	5.48e-206		EGR1	0.263	2.39e-112
TXNL1	0.878	1.29e-277		TM2D2	-0.261	5.57e-108		NME2	0.615	2.42e-164
NONO	0.532	1.3e-140		REEP3	-0.643	5.58e-198		UBE2D2	0.468	2.42e-218
PABPC1	0.727	1.32e-248		JAM2	-0.332	5.6e-124		RPLP2	0.425	2.43e-136
ATP1B1	0.884	1.32e-268		EZH1	-0.321	5.64e-174		CXCL8	0.372	2.47e-177
REL	0.623	1.33e-130		STOM	-0.588	5.73e-126		TRA2A	0.419	2.48e-194
DEGS1	0.615	1.34e-242		TMEM106B	-0.32	5.74e-188		GTF2B	0.374	2.49e-205
IFIH1	0.532	1.35e-134		RARG	-0.302	5.79e-171		LITAF	0.758	2.51e-265
THBS1	0.651	1.35e-141		YPEL3	-0.419	5.82e-157		ITGA2B	0.318	2.52e-114
RPL17-C18orf32	0.649	1.36e-116		CTSF	-0.354	5.85e-167		ENSSSCG00000037777	0.338	2.56e-135
EEF1D	0.674	1.36e-127		KIAA0513	-0.276	5.89e-142		ENSSSCG00000032028	0.67	2.61e-206
NOP58	0.499	1.37e-125		CCDC88C	-0.315	5.89e-194		GNA12	0.292	2.62e-106
EIF4G2	0.768	1.37e-163		GALNT18	-0.655	5.96e-152		KLF16	0.345	2.64e-210
ENSSSCG00000034709	0.675	1.39e-124		PIK3C2B	-0.601	6.07e-229		PIP5K1A	0.45	2.65e-221
ENSSSCG00000015712	0.813	1.39e-257		CYP20A1	-0.532	6.12e-141		ENSSSCG00000033733	0.293	2.67e-149
ENSSSCG00000021576	0.604	1.39e-257		ATP2B4	-0.581	6.2e-291		IRF2BP2	0.539	2.67e-212
GOLT1B	0.3	1.4e-113		ARMCX2	-0.436	6.29e-172		ENSSSCG00000040056	0.265	2.68e-129
SRSF6	0.677	1.4e-195		ECE1	-0.497	6.35e-100		SIPA1L2	0.329	2.69e-148
ACSL4	0.6	1.4e-196		SELENOP	-0.613	6.41e-227		ACTN1	0.368	2.69e-165
CD164	0.653	1.4e-229		VSTM2B	-0.355	6.48e-267		MAPK1IP1L	0.371	2.73e-167
PNN	0.634	1.41e-106		NPR1	-0.685	6.5e-249		TRAFD1	0.306	2.75e-170
CLK1	0.718	1.42e-168		CCND3	-0.53	6.51e-209		ZEB2	0.359	2.76e-166
MOBKL3	0.573	1.42e-178		PLXDC2	-0.42	6.53e-193		RPS18	0.525	2.77e-176
NASP	0.423	1.43e-114		PLCL2	-0.544	6.62e-205		ENSSSCG00000006286	0.362	2.77e-177
RSRC2	0.848	1.43e-199		PREX2	-0.83	6.62e-272		NCK2	0.366	2.78e-113
GSPT1	0.62	1.44e-144		ZRANB2	-0.549	6.65e-135		HEATR3	0.385	2.78e-179
UBQLN1	0.622	1.44e-198		PIEZO1	-0.532	6.8e-184		FSCN1	0.313	2.88e-159
BRWD1	0.797	1.44e-236		ENSSSCG00000005518	-0.769	6.85e-244		SUMO1	0.455	2.88e-189
TOPORS	0.859	1.44e-293		ELK3	-0.493	6.86e-163		GABARAPL2	0.44	2.89e-123
CCT7	0.547	1.45e-157		FER	-0.434	6.96e-130		VAPA	0.482	2.89e-201
IL6ST	0.824	1.45e-222		ENSSSCG00000003261	-0.308	6.99e-121		ENSSSCG00000035037	0.391	2.9e-112
ICAM2	0.549	1.46e-111		PECAM1	-0.305	7.05e-113		SSR4	0.445	2.91e-145
BIN1	0.416	1.46e-134		ABCG2	-0.365	7.14e-242		RPL36A-HNRNPH2	0.643	2.91e-147
ENSSSCG00000011952	0.549	1.47e-116		ENSSSCG00000016263	-0.756	7.14e-298		SNAI2	0.43	2.93e-221
ANKRD12	0.732	1.48e-135		RCAN3	-0.282	7.21e-182		ARL4D	0.339	2.95e-148
CLTB	0.742	1.48e-217		ENSSSCG00000040118	-0.434	7.26e-108		PIM1	0.339	2.95e-227
BTF3L4	0.384	1.49e-117		REX1BD	-0.299	7.3e-104		ENSSSCG00000008451	0.444	2.97e-247
S100A11	0.794	1.49e-158		MFNG	-0.361	7.31e-208		ETNK1	0.306	3e-133
SAMHD1	0.439	1.49e-161		TUT4	-0.611	7.34e-231		MAFG	0.388	3e-218
IRAK2	0.51	1.5e-195		DGKZ	-0.414	7.47e-131		MT-ND5	0.889	3e-272
RHEB	0.781	1.5e-242		PTP4A3	-0.284	7.49e-220		GABARAPL1	0.45	3.01e-158
CDV3	1020	1.51e-291		C12orf57	-0.866	7.57e-288		CHORDC1	0.319	3.03e-146
CTSS	0.814	1.52e-186		CALD1	-0.358	7.86e-135		ITGA5	0.72	3.03e-279
YTHDF2	0.619	1.54e-172		ENSSSCG00000001396	-0.531	7.99e-110		PNPLA3	0.3	3.04e-168
HSPA13	0.607	1.54e-243		MACF1	-0.396	8.01e-116		DYNLL2	0.341	3.05e-149
HNRNPM	0.639	1.55e-132		IGFBP7	-0.578	8.03e-116		RPL37	0.481	3.07e-243
TCF4	0.916	1.55e-234		RXRA	-0.309	8.04e-230		ARID4B	0.48	3.1e-108
ENSSSCG00000034049	0.33	1.56e-132		GJA4	-0.382	8.13e-125		PTP4A1	0.458	3.1e-238
BHLHE40	0.489	1.56e-188		PNISR	-0.619	8.25e-168		MARCHF3	0.449	3.1e-277
TMEM165	0.604	1.56e-192		ALCAM	-0.49	8.25e-170		PRR13	0.308	3.11e-116
IGFBP4	0.588	1.59e-140		AMOTL1	-0.74	8.34e-268		POP5	0.359	3.11e-228
CCL4	0.483	1.59e-162		MLLT6	-0.438	8.4e-178		MOBKL3	0.417	3.12e-195
RNF19B	0.661	1.59e-265		OXCT1	-0.314	8.46e-137		TPM3	0.605	3.14e-108
DYNLL1	0.69	1.6e-153		TMEM123	-0.569	8.5e-200		TP53BP2	0.468	3.14e-282
YWHAZ	0.669	1.61e-132		SLC39A10	-0.641	8.56e-304		ENSSSCG00000002020	0.28	3.15e-157
LAPTM5	0.493	1.62e-106		EVA1B	-0.433	8.66e-117		SNU13	0.478	3.15e-184
CASP8	0.552	1.62e-160		LYST	-0.446	8.7e-207		CYTH1	0.443	3.16e-190
PSMA5	0.715	1.64e-267		MMRN2	-0.903	8.72e-302		ENSSSCG00000031889	0.415	3.16e-238
EIF4A3	0.327	1.66e-105		HSPA12B	-0.449	8.82e-292		KLF13	0.695	3.17e-230
SAR1B	0.334	1.66e-106		SEPTIN9	-0.334	8.9e-180		RPL17-C18orf32	0.651	3.18e-140
EMG1	0.446	1.66e-135		CORO2B	-0.351	8.96e-229		DDIT4	0.725	3.18e-290
PLEKHO1	0.873	1.66e-210		PHTF1	-0.325	8.97e-125		SMARCA5	0.628	3.2e-215
TUBB2B	0.544	1.66e-211		ENSSSCG00000049158	-0.532	9.02e-140		STK17B	0.343	3.22e-216
ENSSSCG00000016828	0.387	1.68e-128		LIMS2	-0.29	9.06e-153		ACAT2	0.325	3.23e-215
BTG3	0.787	1.68e-266		SNRK	-0.621	9.14e-131		SASH1	0.664	3.23e-266
TOP1	1034	1.68e-276		WASHC4	-0.539	9.15e-218		RPL27	0.714	3.25e-202
ARL8B	0.323	1.69e-105		PHACTR2	-0.588	9.44e-116		ANKRD28	0.549	3.26e-272
MX2	0.425	1.69e-116		MCF2L	-0.414	9.48e-281		RASSF3	0.334	3.3e-174
SERBP1	0.787	1.69e-173		COX17	-0.412	9.52e-122		FAM177A1	0.31	3.31e-158
WWTR1	0.908	1.69e-273		ENSSSCG00000049524	-0.501	9.66e-273		FHOD1	0.353	3.32e-166
MT-ND2	1050	1.69e-291		ARHGDIB	-0.359	9.69e-117		GJC1	0.644	3.32e-274
EIF3M	0.485	1.7e-144		NSD1	-0.525	9.82e-202		KLF4	0.565	3.33e-166
ENSSSCG00000031889	0.488	1.7e-166		ZNF395	-0.291	9.9e-145		ENSSSCG00000007692	0.417	3.35e-163
PLK3	0.463	1.72e-165						UAP1	0.392	3.35e-235
ENSSSCG00000017626	0.564	1.72e-178						PHF12	0.354	3.36e-157
INSIG1	0.395	1.74e-154						ZNF800	0.318	3.37e-134
CD3EAP	0.498	1.75e-191						SH3PXD2A	0.269	3.37e-151
C1orf21	0.588	1.75e-232						ENSSSCG00000011952	0.711	3.44e-303
PSMD2	0.502	1.76e-135						ENSSSCG00000038359	0.54	3.5e-239
M6PR	0.768	1.76e-244						LRRC57	0.442	3.52e-163
CASP7	0.451	1.77e-126						RPL22	0.525	3.55e-101
ENSSSCG00000003520	0.648	1.79e-121						ENSSSCG00000000908	0.526	3.55e-271
ENSSSCG00000023305	0.309	1.8e-109						ABI1	0.325	3.58e-154
ENSSSCG00000000696	0.29	1.8e-110						ID4	0.25	3.6e-158
CCT3	0.691	1.8e-230						MKNK2	0.431	3.6e-231
RELL1	0.707	1.8e-282						DDX21	0.771	3.62e-304
RBM8A	0.904	1.82e-264						PIM3	0.39	3.64e-101
PCMT1	0.453	1.83e-141						TOX4	0.425	3.68e-188
ENSSSCG00000032242	0.489	1.85e-205						ELL	0.407	3.69e-230
SMAD3	0.364	1.86e-125						ENSSSCG00000009341	0.43	3.71e-105
UOX	0.726	1.86e-144						KLF7	0.565	3.71e-231
STC1	0.747	1.86e-210						GSTO2	0.284	3.76e-171
ADGRF4	0.418	1.87e-119						DHRS3	0.6	3.82e-170
UBE2D3	0.704	1.87e-173						TEAD4	0.418	3.88e-185
ENSSSCG00000014043	0.84	1.87e-204						DDX39A	0.284	3.9e-153
NUDC	0.484	1.88e-110						RBM14	0.483	3.9e-210
TRIM28	0.425	1.88e-110						PSMD12	0.423	3.92e-171
EIF4E	0.493	1.89e-148						CCNB1IP1	0.497	3.92e-284
TLR2	0.398	1.91e-159						CALR	0.685	3.98e-158
SOX17	0.562	1.91e-192						ELF2	0.669	3.98e-284
PPP1R10	0.581	1.93e-140						ATG101	0.339	4e-196
SYS1	0.685	1.93e-149						PCMT1	0.278	4.01e-118
CHORDC1	0.458	1.95e-144						CCDC85B	0.432	4.03e-182
ZSWIM6	0.428	1.96e-146						ZBTB10	0.495	4.03e-271
RPS6	0.796	1.96e-223						SSR2	0.723	4.05e-194
BST2	1018	1.96e-297						ENSSSCG00000004572	0.401	4.05e-218
FCHSD2	0.694	1.97e-224						GCH1	0.438	4.07e-280
BAG3	0.524	1.98e-198						ENSSSCG00000006777	0.547	4.08e-195
MLLT11	0.506	1.98e-198						FBXO11	0.264	4.1e-100
TSPAN12	0.433	1.99e-138						RPS5	0.678	4.1e-234
MCM7	0.426	1.99e-157						ENSSSCG00000027905	0.341	4.11e-193
PSMD12	0.708	1.99e-222						ERBB3	0.808	4.18e-305
PNRC1	0.906	1.99e-233						ELL2	0.288	4.19e-177
AMPD2	0.438	2e-171						SBDS	0.677	4.19e-302
SNU13	0.612	2.02e-176						CDK2AP2	0.462	4.29e-218
ARL5B	0.793	2.03e-294						BCLAF1	0.737	4.3e-211
POLR1C	0.334	2.04e-125						TNIP1	0.509	4.32e-281
KMT5A	0.375	2.05e-125						MAP3K14	0.379	4.34e-213
ENY2	0.701	2.05e-236						KLF9	0.536	4.35e-142
DENND2C	0.706	2.06e-234						TLR4	0.477	4.35e-259
LRRC59	0.577	2.06e-237						KDM6B	0.471	4.38e-253
ENSSSCG00000041731	0.387	2.09e-130						TNFAIP8L1	0.378	4.41e-237
SLC35B2	0.402	2.09e-145						ENSSSCG00000006564	0.296	4.42e-156
SAP18	0.686	2.1e-136						WHAMM	0.3	4.46e-127
ENSSSCG00000010525	0.333	2.11e-107						EZR	0.33	4.47e-163
SLC36A4	0.333	2.11e-114						INSIG1	0.394	4.47e-264
NDRG1	0.342	2.11e-123						YWHAH	0.476	4.53e-110
EHD4	0.842	2.11e-204						HSD11B1L	0.546	4.53e-122
ATP5MG	0.636	2.14e-156						RRAD	0.454	4.56e-294
OAS1	0.556	2.14e-183						IPO7	0.333	4.57e-140
IPO5	0.597	2.14e-211						ZC3H12A	0.33	4.57e-223
ENSSSCG00000022322	0.409	2.15e-124						POLB	0.485	4.59e-200
ENSSSCG00000013906	0.628	2.15e-236						ZNF503	0.467	4.59e-279
MX1	0.43	2.16e-132						PHACTR4	0.278	4.6e-137
PSMD1	0.498	2.18e-119						IFITM3	0.576	4.61e-101
F2RL3	0.725	2.19e-294						BTF3	0.761	4.61e-212
IL4R	0.75	2.19e-297						CREBZF	0.326	4.63e-153
ILF2	0.555	2.23e-185						NABP1	0.31	4.74e-201
PITPNB	0.523	2.24e-134						PPP1R10	0.718	4.74e-306
SLC39A1	0.452	2.26e-154						PPP4R3A	0.536	4.75e-178
SARAF	0.457	2.27e-172						ENSSSCG00000010734	0.283	4.76e-150
PLK2	0.802	2.29e-154						PITPNB	0.544	4.77e-231
HSPE1	0.825	2.29e-274						TBPL1	0.256	4.78e-142
GRASP	0.679	2.31e-158						TGFB1	0.547	4.79e-162
GRWD1	0.257	2.32e-100						CCN1	0.312	4.81e-182
NAA20	0.494	2.34e-109						SERPINE1	0.626	4.85e-288
C1QBP	0.624	2.34e-239						KMT5A	0.278	4.91e-145
CHIC2	0.806	2.35e-248						PNPLA8	0.36	4.95e-179
SLC16A1	0.302	2.36e-124						UBE2R2	0.277	4.99e-132
AAMP	0.322	2.38e-110						LDHA	0.305	5e-147
PFDN2	0.562	2.46e-135						TMEM41B	0.471	5e-266
HSPA9	0.707	2.46e-221						ENSSSCG00000014565	0.565	5.01e-103
FUNDC1	0.487	2.48e-159						CLEC2B	0.847	5.02e-302
PSMD11	0.542	2.48e-160						PTBP1	0.531	5.05e-106
RPS23	0.711	2.48e-178						UBE2H	0.383	5.1e-135
ACAT2	0.453	2.48e-201						EHD4	0.579	5.13e-208
RBMX	0.73	2.5e-222						SMAD3	0.275	5.14e-159
ENSSSCG00000024974	0.476	2.51e-122						SARS1	0.439	5.16e-213
POLR2K	0.888	2.53e-270						MEF2D	0.484	5.21e-194
MT1A	0.728	2.55e-266						GPR4	0.449	5.29e-169
ENSSSCG00000010203	1016	2.55e-300						KCMF1	0.348	5.33e-170
SRPRA	0.713	2.57e-188						HERPUD1	0.595	5.37e-154
USP15	0.718	2.58e-186						MORF4L2	0.471	5.41e-226
MYCT1	0.766	2.59e-195						WAC	0.443	5.44e-175
SLC4A7	0.481	2.59e-199						FCHSD2	0.304	5.46e-123
RPS3A	0.678	2.6e-173						ZNFX1	0.357	5.54e-160
PDGFB	0.598	2.62e-112						HEXIM1	0.339	5.55e-196
PPP2CA	0.435	2.63e-123						ENSSSCG00000040857	0.433	5.58e-195
SBDS	0.673	2.69e-196						BIN1	0.365	5.6e-215
WSB1	0.612	2.7e-107						TAF5L	0.262	5.64e-134
MSX1	0.321	2.7e-117						SLC31A1	0.255	5.64e-177
ENSSSCG00000017106	0.482	2.7e-181						TGFB2	0.289	5.72e-114
GCLM	0.351	2.72e-129						RPS15	0.363	5.77e-102
ENSSSCG00000004970	0.452	2.73e-156						YES1	0.449	5.84e-217
DNAJB1	0.675	2.79e-252						EIF2AK3	0.256	5.86e-142
RPS5	0.863	2.79e-294						IVNS1ABP	0.324	5.96e-114
ENSSSCG00000006559	0.4	2.8e-113						NFIL3	0.373	6.07e-256
BUD23	0.517	2.8e-179						ENSSSCG00000014414	0.387	6.09e-136
LDLR	0.423	2.81e-139						PGM2L1	0.312	6.1e-199
ZSWIM4	0.252	2.83e-102						CD14	0.302	6.15e-172
PTPRE	0.834	2.83e-211						DENND4A	0.436	6.16e-278
PCBP1	0.704	2.84e-173						GFOD2	0.317	6.23e-125
PTPN1	0.456	2.85e-128						FZD5	0.338	6.31e-211
KIAA1191	0.563	2.85e-204						ETF1	0.564	6.35e-233
ATP6V1G1	0.617	2.86e-167						GSK3B	0.307	6.4e-100
NRIP1	0.753	2.87e-260						CORO1C	0.34	6.43e-172
SLC1A5	0.48	2.88e-194						SF3B6	0.353	6.53e-128
SACS	0.322	2.9e-118						HNRNPH3	0.502	6.55e-140
RSL1D1	0.682	2.91e-194						SNAPC1	0.356	6.61e-169
ENSSSCG00000000107	0.69	2.92e-168						ID2	0.672	6.62e-150
SQLE	0.5	2.93e-179						ENSSSCG00000008748	0.253	6.65e-108
ENSSSCG00000039731	0.367	2.94e-121						BCL3	0.28	6.66e-130
HIVEP2	0.414	2.95e-132						PLEKHO1	0.742	6.76e-209
TMED10	0.629	2.96e-124						ATF1	0.423	6.79e-263
CASP10	0.747	2.96e-266						SIGIRR	0.427	6.82e-180
ABCE1	0.334	2.99e-104						SYPL1	0.46	6.84e-175
ZNFX1	0.529	2.99e-147						ZBTB7A	0.476	6.84e-239
TOX4	0.436	3.01e-121						SBNO2	0.26	6.95e-142
ENSSSCG00000013361	0.323	3.07e-106						LAPTM4A	0.735	7.05e-186
CCT4	0.61	3.07e-186						EEF1G	0.843	7.07e-278
LDHA	0.336	3.09e-101						GPRC5B	0.291	7.12e-106
FUBP1	0.479	3.1e-138						MEPCE	0.373	7.13e-211
ENSSSCG00000000767	0.61	3.11e-150						ZBTB11	0.464	7.16e-238
RPL7A	0.654	3.11e-226						MRPL38	0.261	7.38e-130
VMP1	0.889	3.15e-303						POLR1D	0.645	7.4e-299
CYB5B	0.486	3.18e-165						ZFP2	0.298	7.45e-169
PTPN2	0.454	3.2e-161						TUBB2B	0.259	7.47e-143
CSNK1A1	0.813	3.2e-199						RPS16	0.523	7.47e-171
NFKB1	0.453	3.22e-129						SLC1A5	0.341	7.57e-165
NDFIP2	0.384	3.23e-111						RPS9	0.466	7.61e-196
TNFAIP8L1	0.313	3.26e-118						GNAZ	0.269	7.67e-166
SARS1	0.54	3.27e-168						ZNF654	0.38	7.67e-191
SLCO4A1	0.439	3.28e-192						SLA-DQB1	0.718	7.7e-190
ENSSSCG00000001930	0.654	3.35e-152						ENSSSCG00000035209	0.406	7.71e-168
CDC34	0.329	3.36e-119						SAFB2	0.506	7.75e-212
DNAJB6	0.698	3.37e-184						LUC7L3	0.723	7.76e-265
UBE2A	0.374	3.38e-132						ASXL1	0.342	7.82e-175
MARCHF3	0.593	3.38e-236						UBE2D3	0.68	7.88e-251
ATP6V0B	0.45	3.4e-101						CFL1	0.779	7.9e-216
CSRNP1	0.359	3.4e-102						SOX17	0.54	7.93e-256
XRN2	0.571	3.46e-146						NFE2L3	0.285	7.94e-186
GRAMD2B	0.386	3.48e-122						RPIA	0.306	8.09e-137
RANBP1	0.707	3.49e-175						ABHD17B	0.499	8.11e-263
EPHA2	0.303	3.5e-117						RCAN1	0.421	8.13e-271
ENSSSCG00000030849	0.62	3.5e-139						TCF7	0.46	8.26e-305
NUFIP2	0.747	3.5e-199						UBQLN1	0.433	8.29e-207
TMEM263	0.324	3.52e-120						ADGRE5	0.309	8.35e-107
ESM1	0.385	3.52e-123						TRAF4	0.423	8.38e-261
IRF8	0.326	3.54e-124						NOP56	0.379	8.42e-156
TLNRD1	0.584	3.56e-110						MCAM	0.275	8.53e-142
NUP50	0.535	3.56e-147						ARPC2	0.514	8.53e-152
TMEM41B	0.5	3.56e-181						RPL3	0.599	8.72e-135
ENSSSCG00000039249	0.454	3.59e-102						ENSSSCG00000033019	0.723	8.86e-215
NUAK2	0.279	3.59e-107						FEM1C	0.45	8.88e-243
EIF3A	0.645	3.61e-148						MACO1	0.303	8.89e-114
MCAM	0.453	3.61e-154						MARCHF5	0.331	8.89e-173
EIF2AK2	0.67	3.66e-162						FBXW11	0.398	8.94e-137
RPS9	0.587	3.67e-207						RASD1	0.304	9.03e-206
PCNA	0.658	3.68e-256						IFIH1	0.366	9.12e-153
ENSSSCG00000012427	0.71	3.71e-182						PPP1R18	0.463	9.27e-275
CLCN5	0.289	3.72e-110						THAP11	0.347	9.28e-195
CDK2AP2	0.436	3.72e-117						RAP1A	0.456	9.3e-115
KPNA2	0.704	3.72e-299						ACTR3	0.522	9.36e-228
MEX3C	0.703	3.73e-286						PTMA	0.38	9.39e-293
MT-ND3	0.812	3.78e-244						B4GALT1	0.296	9.43e-117
ZPR1	0.39	3.79e-135						ENSSSCG00000014031	0.438	9.48e-144
UPP1	0.623	3.8e-244						FNBP4	0.565	9.48e-187
CDKN1C	0.483	3.81e-196						UBR5	0.575	9.48e-198
CSNK2A2	0.529	3.84e-137						TSPAN6	0.54	9.53e-260
SSR1	0.515	3.85e-120						PSMD8	0.288	9.56e-106
ETF1	0.554	3.85e-163						GRAMD2B	0.353	9.59e-181
ENSSSCG00000020808	0.636	3.85e-210						ANKRD10	0.335	9.6e-148
KLF9	0.507	3.88e-100						FAM102A	0.315	9.63e-183
RACK1	0.738	3.88e-174						ATP1B1	0.471	9.64e-107
EEF1G	0.965	3.91e-289						RHOB	0.793	9.76e-232
ENSSSCG00000006286	0.391	3.92e-125						CDK9	0.368	9.77e-107
ENSSSCG00000017913	0.646	3.92e-199						YWHAQ	0.395	9.8e-103
DKC1	0.645	3.93e-224						ENSSSCG00000036115	0.281	9.8e-121
ENSSSCG00000000405	0.557	3.95e-124						ZBTB1	0.324	9.98e-170
ENSSSCG00000031893	0.697	3.96e-279						RPSA	0.881	9.99e-302
RASD1	0.36	3.97e-150
TP53BP2	0.365	4e-123
ENSSSCG00000036296	0.649	4e-160
SLC20A1	0.506	4.02e-191
STK40	0.463	4.03e-173
AGO2	0.331	4.04e-113
IPO7	0.43	4.07e-120
ODC1	0.586	4.07e-246
SSR3	0.519	4.12e-136
CITED2	0.256	4.22e-102
MT-COX2	0.698	4.22e-219
DUSP16	0.36	4.27e-128
GDF15	0.439	4.31e-117
SLC10A1	0.473	4.31e-198
ENSSSCG00000031381	0.629	4.35e-141
CAPZA1	0.432	4.37e-127
EIF4EBP1	0.651	4.41e-239
KIT	0.796	4.48e-256
TSPAN6	0.69	4.51e-238
GCH1	0.389	4.55e-141
RAB7A	0.516	4.59e-127
SUMO2	0.757	4.64e-158
CCT5	0.848	4.64e-275
LRRC8C	0.452	4.67e-105
RPS7	0.686	4.67e-226
RND3	0.56	4.67e-226
CACYBP	0.465	4.68e-132
RPSA	0.638	4.71e-111
RNF126	0.398	4.71e-139
SNRPA1	0.543	4.74e-181
MGAT4A	0.625	4.83e-153
RTN4	0.7	4.83e-168
NET1	0.473	4.91e-105
SEC23B	0.324	4.94e-111
LYPLA1	0.408	4.94e-126
LITAF	0.828	4.97e-201
CCT8	0.811	5.01e-306
WFDC1	0.416	5.02e-114
ATG3	0.333	5.09e-100
SSB	0.628	5.1e-121
WEE1	0.575	5.1e-254
HSD3B7	0.5	5.17e-170
NFE2L3	0.311	5.24e-124
PSME2	0.572	5.26e-143
PSMB4	0.651	5.27e-189
PHC2	0.47	5.3e-115
PHF13	0.298	5.3e-115
FURIN	0.43	5.3e-133
GNA13	0.419	5.35e-117
RAB10	0.491	5.36e-123
MED4	0.464	5.37e-131
GHITM	0.533	5.42e-169
CXCL10	0.458	5.44e-139
TOB2	0.786	5.44e-228
BACH1	0.548	5.45e-163
NFKB2	0.653	5.53e-240
GNL3	0.569	5.57e-245
TMED7	0.497	5.6e-136
ATP5F1A	0.492	5.63e-102
SDF4	0.828	5.69e-234
DHX9	0.945	5.7e-280
ENSSSCG00000039201	0.344	5.72e-110
DDX24	0.559	5.73e-117
KCMF1	0.397	5.78e-123
SPCS3	0.54	5.78e-130
RPLP2	0.661	5.78e-269
PSMD13	0.528	5.81e-156
MAP3K8	0.562	5.81e-218
HSPD1	0.763	5.87e-246
PTP4A2	0.557	5.98e-128
ENSSSCG00000000908	0.553	6.03e-177
CHSY1	0.594	6.06e-231
ENSSSCG00000024973	0.553	6.08e-142
FAM167B	0.596	6.09e-162
ENSSSCG00000038359	0.87	6.1e-303
TGIF1	0.492	6.11e-208
PSMC6	0.478	6.16e-139
SMNDC1	0.689	6.18e-187
NRP2	0.523	6.19e-136
PSMA1	0.717	6.19e-230
ENSSSCG00000040879	0.747	6.21e-156
DDIT4	0.713	6.22e-170
ZFAND2A	0.378	6.23e-151
KLHL29	0.277	6.39e-107
PSMD3	0.549	6.41e-163
PPIB	0.803	6.41e-191
ETV3	0.551	6.44e-174
AZIN1	0.696	6.45e-280
SMOX	0.731	6.47e-276
SASH1	0.682	6.51e-144
PDCD10	0.451	6.55e-107
TBC1D15	0.461	6.57e-126
NOP56	0.834	6.57e-277
PLXNA2	0.639	6.58e-223
UBE2S	0.662	6.58e-250
ENSSSCG00000011272	0.778	6.67e-252
SLC30A4	0.367	6.69e-103
FOSL1	0.404	6.69e-180
AMD1	0.491	6.72e-104
FZD5	0.318	6.73e-117
YWHAH	0.648	6.78e-145
ARID5A	0.283	6.81e-110
ENSSSCG00000020830	0.8	6.82e-185
ENSSSCG00000017920	0.993	6.83e-268
NFKBIB	0.708	6.83e-290
GPX1	0.946	6.83e-300
LYAR	0.34	6.89e-126
SLC25A25	0.554	6.91e-202
SPPL2A	0.464	6.92e-103
ABL2	0.579	6.95e-192
CCNYL1	0.842	6.97e-244
ARRDC4	0.342	6.98e-105
CNIH4	0.443	7e-133
ENSSSCG00000027905	0.348	7.08e-118
CLTA	0.662	7.08e-132
WTAP	0.513	7.08e-137
KDELR2	0.618	7.12e-170
SNRPG	0.465	7.13e-105
ADM	0.653	7.15e-278
MORF4L2	0.507	7.18e-157
ENSSSCG00000012997	0.261	7.22e-100
TRIB1	0.601	7.31e-263
RPL7L1	0.616	7.33e-185
PRDM1	0.391	7.34e-104
SERP1	0.708	7.36e-273
RPS18	0.708	7.4e-234
NAV2	0.351	7.45e-110
SZRD1	0.47	7.48e-133
ENSSSCG00000029830	0.689	7.48e-260
ENSSSCG00000031117	0.27	7.53e-101
ENSSSCG00000036114	0.911	7.59e-291
PSMB2	0.677	7.61e-201
CALR	0.67	7.63e-115
ZNF207	0.463	7.66e-136
HK1	0.77	7.69e-178
TICAM1	0.406	7.74e-160
GLS	0.909	7.74e-282
WDR43	0.399	7.83e-139
ENSSSCG00000027746	0.776	7.96e-204
G3BP1	0.521	7.99e-131
THOC6	0.527	8.01e-203
PDLIM7	0.885	8.03e-305
PRMT1	0.684	8.09e-188
PARP14	0.581	8.18e-147
RELB	0.618	8.18e-253
OLR1	0.408	8.19e-112
ENSSSCG00000010058	0.502	8.21e-128
S100A10	0.669	8.24e-130
SF3B6	0.535	8.25e-138
NXT1	0.342	8.31e-121
CCNL1	0.622	8.33e-101
MAFG	0.423	8.35e-153
MAPK6	0.419	8.43e-122
PHF23	0.427	8.47e-154
FAM102A	0.704	8.57e-305
SLC39A6	0.369	8.58e-152
TLE4	0.391	8.59e-129
PSMB7	0.554	8.64e-169
EIF6	0.879	8.69e-271
RAP2B	0.337	8.75e-137
PHF5A	0.432	8.76e-135
NFKBIE	0.413	8.78e-167
TCF7	0.47	8.8e-179
NARS1	0.726	8.82e-244
XBP1	0.562	8.84e-157
SLC39A7	0.373	8.91e-120
CDK17	0.618	9.03e-197
APEX1	0.338	9.05e-141
HNRNPH1	0.929	9.06e-241
ENSSSCG00000014361	0.559	9.07e-147
PSMD14	0.424	9.07e-161
ENSSSCG00000006928	0.701	9.09e-274
MRTO4	0.661	9.14e-255
ENSSSCG00000006061	0.481	9.17e-120
TIMM8A	0.301	9.23e-124
ID1	0.826	9.25e-168
EFNA1	0.924	9.27e-236
PFKFB3	0.632	9.28e-239
OSER1	0.432	9.34e-158
FERMT1	0.771	9.34e-179
DSTN	0.473	9.35e-131
ENSSSCG00000016990	0.515	9.4e-143
RPS13	0.743	9.42e-177
TIPARP	0.469	9.43e-181
ADAMTS4	0.726	9.43e-291
YES1	0.627	9.51e-201
ENSSSCG00000001398	0.861	9.53e-203
SRRT	0.398	9.6e-110
RPL27	0.636	9.69e-111
FHOD1	0.582	9.69e-191
PSMC2	0.352	9.71e-115
ACTR3	0.592	9.72e-167
ENSSSCG00000024555	0.528	9.72e-195
NAP1L1	0.733	9.75e-162
PPP1R14B	0.751	9.77e-261
SURF4	0.417	9.78e-121
MAPRE1	0.503	9.84e-150
TMEM189	0.362	9.88e-102
SNRPE	0.505	9.9e-122
PGK1	0.51	9.91e-177
CD79A	0.426	9.92e-179
SLC30A7	0.496	9.94e-156

## Sheet: Medulla
Table S5: DEGs in mRECs
WT_up regulated				WT_down regulated				4KO_up regulated				4KO_down regulated
feature	logFC	padj		feature	logFC	padj		feature	logFC	padj		feature	logFC	padj
CLDN5	2803	0		C6orf62	-0.344	1.01e-11		PRSS23	1139	0		CXCL2	-3029	0
SERPINE1	2162	0		CBX4	-0.554	1.01e-43		ENSSSCG00000012119	0.414	1e-39		RAPGEF4	-0.261	1.01e-20
PRSS23	1659	0		DDX23	-0.823	1.02e-55		LRRC70	0.351	1.01e-31		HSPA5	-0.371	1.01e-26
GSTO1	1554	0		NPR1	-0.862	1.03e-79		ACKR3	0.28	1.03e-22		RNF122	-0.509	1.01e-54
RNF121	1536	0		EPB41L2	-0.313	1.05e-11		ENSSSCG00000009211	0.495	1.04e-61		HSP90AA1	-0.481	1.01e-83
GNB2	0.338	1e-18		MIDN	-0.481	1.05e-23		RPLP0	0.288	1.05e-17		HERC6	-0.278	1.02e-26
MT-ND2	0.501	1e-22		CALD1	-0.406	1.05e-23		WFDC1	0.381	1.05e-30		KLF7	-0.385	1.02e-33
ENSSSCG00000004970	0.452	1e-22		MEPCE	-0.448	1.06e-30		SEPTIN11	0.408	1.05e-31		GALNT18	-0.405	1.03e-54
EEF1B2	0.711	1e-45		DST	-0.692	1.06e-45		SOX18	0.303	1.06e-21		SYNE2	-0.288	1.04e-26
ENSSSCG00000017626	0.415	1.01e-25		JUP	-0.259	1.07e-12		DNTTIP2	0.401	1.06e-47		ATP1A1	-0.279	1.06e-15
KAZN	0.294	1.01e-50		PELI1	-0.361	1.07e-13		LGMN	0.274	1.12e-23		KLF9	-0.272	1.06e-27
SLC8A1	0.369	1.01e-59		ZBTB20	-0.665	1.08e-53		PEA15	0.444	1.13e-47		CCNYL1	-0.323	1.07e-24
PTGES	0.343	1.01e-84		NFATC1	-0.256	1.09e-14		ENSSSCG00000014351	0.276	1.14e-13		NFKB2	-0.266	1.1e-22
CNIH4	0.281	1.02e-36		SPTAN1	-0.458	1.09e-27		NME2	0.398	1.15e-33		TEK	-0.398	1.1e-34
CREBZF	0.501	1.02e-44		RTN4	-0.599	1.09e-42		ITGB1	0.261	1.17e-19		AFF1	-0.317	1.12e-23
FAM167B	0.423	1.03e-30		ARL5B	-0.968	1.09e-71		ENSSSCG00000009851	0.297	1.17e-35		STC2	-0.328	1.13e-52
PDCD10	0.375	1.03e-43		ZMIZ1	-0.27	1.1e-08		TRABD	0.419	1.17e-94		NFIL3	-0.37	1.13e-59
RSAD2	0.453	1.03e-66		PCNA	-0.334	1.12e-15		HPCAL1	0.373	1.18e-55		CRIM1	-0.595	1.13e-72
ATP5MD	0.613	1.03e-88		FBH1	-0.361	1.12e-21		AKAP12	0.695	1.2e-54		HEXIM1	-0.278	1.14e-41
ATF6	0.328	1.05e-24		MED13	-0.265	1.13e-08		ENSSSCG00000014361	0.456	1.21e-49		SERPINE1	-0.757	1.15e-48
FAM204A	0.273	1.05e-30		KIFC3	-0.29	1.13e-13		ENSSSCG00000015712	0.287	1.23e-16		NRP1	-0.387	1.16e-42
IK	0.261	1.07e-17		NUMA1	-0.315	1.13e-14		G3BP1	0.307	1.25e-23		ZSWIM6	-0.432	1.17e-35
C1QBP	0.515	1.07e-96		ENSSSCG00000004387	-0.311	1.13e-20		C2CD2	0.275	1.26e-21		TIPARP	-0.387	1.19e-28
HYAL2	0.329	1.08e-09		IFRD1	-0.591	1.13e-34		ZKSCAN1	0.302	1.26e-40		GSK3B	-0.398	1.19e-36
KDELR2	0.323	1.08e-23		PICALM	-0.412	1.14e-19		PPIG	0.421	1.27e-84		JAK2	-0.382	1.21e-35
DNAJB6	0.43	1.08e-24		RAPGEF5	-0.333	1.16e-11		RSL24D1	0.399	1.28e-50		ENSSSCG00000024973	-0.574	1.22e-55
NUDC	0.332	1.08e-26		PTPRM	-0.545	1.16e-32		ENSSSCG00000001696	0.268	1.28e-52		ANKRD12	-0.574	1.22e-68
LRPAP1	0.433	1.08e-44		PBX1	-0.521	1.17e-27		TCP1	0.267	1.29e-19		JMJD1C	-0.642	1.23e-73
NAP1L1	0.617	1.08e-47		TP53I11	-0.589	1.18e-30		WAPL	0.325	1.29e-31		BAG3	-0.338	1.24e-30
GRWD1	0.262	1.08e-67		ENSSSCG00000029199	-0.441	1.18e-34		RALA	0.266	1.31e-18		RYBP	-0.466	1.25e-57
VAMP5	0.545	1.08e-70		NFKBIA	-0.373	1.19e-19		EEF1B2	0.324	1.31e-19		CYYR1	-0.41	1.25e-57
ENSSSCG00000000767	0.398	1.1e-24		ADGRF5	-0.585	1.19e-32		ENSSSCG00000017920	0.6	1.33e-71		ADAMTS4	-0.409	1.26e-18
HSD3B7	0.35	1.1e-51		ENSSSCG00000002259	-0.267	1.2e-08		COX4I1	0.289	1.36e-17		EHD4	-0.432	1.27e-42
REXO2	0.363	1.1e-71		LMCD1	-0.601	1.2e-42		PGRMC1	0.254	1.36e-19		ERBIN	-0.39	1.28e-41
RPL29	0.355	1.11e-12		ZNF462	-0.267	1.21e-13		PDGFB	0.349	1.38e-21		VCAM1	-0.253	1.31e-08
RALA	0.544	1.11e-38		SLA-DMB	-0.357	1.21e-27		ENSSSCG00000007743	0.276	1.39e-20		HERPUD1	-0.359	1.34e-24
HSD11B1L	0.733	1.11e-46		LMO7	-0.363	1.22e-22		RPL29	0.525	1.39e-60		ZFP36L1	-0.566	1.35e-48
SPPL2A	0.532	1.11e-69		PPP2R5A	-0.418	1.23e-19		PRPF4B	0.435	1.4e-21		TLNRD1	-0.297	1.36e-21
TRABD	0.444	1.11e-70		ENSSSCG00000032599	-0.993	1.23e-67		ENSSSCG00000007188	0.341	1.4e-25		ANKRD17	-0.257	1.37e-19
TSPAN6	0.78	1.11e-75		ENSSSCG00000015853	-0.291	1.24e-12		RPL5	0.384	1.4e-36		CLEC2B	-0.257	1.39e-18
FBXO39	0.345	1.11e-84		NRP1	-0.274	1.25e-08		FAM177A1	0.383	1.4e-43		MACF1	-0.555	1.39e-59
PCBP1	0.532	1.12e-32		DDX3X	-0.533	1.25e-48		PRDX5	0.251	1.4e-55		NR4A1	-0.574	1.4e-52
MAFG	0.306	1.12e-36		ACTB	-0.999	1.26e-82		SNRK	0.493	1.43e-58		FOS	-0.746	1.4e-64
XPO5	0.303	1.12e-37		AFF4	-0.262	1.27e-07		HNRNPH3	0.441	1.44e-44		PTBP1	-0.454	1.41e-46
MRPS26	0.398	1.12e-44		GUCY1A1	-0.319	1.27e-17		B4GALT5	0.308	1.46e-23		HNRNPA1	-0.456	1.41e-48
PSMD12	0.43	1.12e-50		TCN2	-0.362	1.27e-18		PLP2	0.268	1.46e-38		BCLAF1	-0.377	1.42e-28
ST7	0.277	1.12e-68		CASP10	-0.52	1.29e-31		INHBB	0.35	1.47e-81		GEM	-0.278	1.43e-14
CYB5B	0.455	1.12e-72		ENSSSCG00000009138	-0.283	1.3e-20		RPS15	0.309	1.5e-11		TOB2	-0.507	1.43e-50
RPN1	0.284	1.13e-25		FLT1	-0.331	1.33e-14		RELL1	0.255	1.5e-18		IRF1	-0.574	1.43e-88
KMT5A	0.277	1.13e-25		MBNL2	-0.283	1.35e-12		SUMO2	0.418	1.56e-36		ENSSSCG00000013361	-0.299	1.44e-33
ZDHHC18	0.26	1.13e-32		TOB2	-0.611	1.35e-41		ENSSSCG00000031381	0.4	1.56e-37		CTSC	-0.296	1.45e-20
ENSSSCG00000000377	0.621	1.13e-90		ENSSSCG00000005095	-0.268	1.36e-10		NVL	0.255	1.56e-41		TLR4	-0.503	1.45e-58
ITM2C	0.334	1.14e-22		SLA-DOA	-0.279	1.37e-18		MORF4L1	0.343	1.58e-28		CXCL8	-0.742	1.48e-88
ENSSSCG00000014343	0.399	1.14e-25		DNAJB1	-0.382	1.38e-15		IMP4	0.27	1.58e-41		BAZ1A	-0.415	1.5e-34
RNF126	0.334	1.14e-38		PEAK1	-0.467	1.38e-26		RRAS	0.333	1.61e-30		FUS	-0.367	1.5e-35
ENSSSCG00000037245	0.302	0.000116		FILIP1	-0.478	1.39e-27		BTF3	0.392	1.61e-33		EPHA2	-0.329	1.51e-37
APBB2	0.269	1.16e-16		TIE1	-0.565	1.39e-32		ENSSSCG00000011272	0.381	1.64e-28		RBM39	-0.326	1.52e-26
ITGB1	0.492	1.16e-22		LTBP4	-0.6	1.39e-45		TMBIM1	0.359	1.64e-37		PREX2	-0.25	1.52e-37
ERBB3	0.73	1.16e-48		ADM	-0.441	1.4e-14		MRPL17	0.48	1.69e-54		KLF5	-0.307	1.52e-40
EIF5B	0.594	1.16e-56		RBBP6	-0.894	1.4e-68		ENSSSCG00000014540	0.437	1.69e-58		SOCS3	-0.526	1.54e-40
CTNNB1	0.263	1.17e-14		FRMD4B	-0.383	1.41e-14		NUDT3	0.346	1.7e-23		ENSSSCG00000038215	-0.381	1.55e-28
E2F4	0.264	1.17e-31		ENSSSCG00000046588	-0.256	1.41e-17		BATF3	0.368	1.7e-40		ZBTB11	-0.307	1.56e-36
SELENOF	0.287	1.18e-17		GATA3	-0.36	1.41e-21		CCNL1	0.378	1.71e-33		CXCL12	-0.298	1.57e-24
NOL4L	0.256	1.18e-24		UTRN	-1049	1.41e-95		PDLIM7	0.396	1.77e-39		TMSB10	-0.464	1.57e-51
CNDP2	0.265	1.19e-23		ABCA1	-0.847	1.43e-64		IDH2	0.317	1.77e-41		LIMA1	-0.422	1.62e-38
RPS3A	0.534	1.19e-26		LYST	-0.385	1.45e-23		MAP1B	0.431	1.78e-38		TIFA	-0.27	1.64e-31
LUC7L3	0.682	1.19e-78		ZBTB16	-0.326	1.45e-27		CCDC85B	0.27	1.8e-44		FOSB	-0.496	1.64e-44
ENSSSCG00000000107	0.28	1.2e-09		HES1	-1070	1.45e-70		ITM2B	0.341	1.81e-32		PHACTR4	-0.332	1.65e-53
SLCO4A1	0.36	1.2e-16		MYO1E	-0.273	1.47e-16		ENSSSCG00000032591	0.297	1.82e-10		PPP1R10	-0.459	1.66e-40
OTUD4	0.289	1.2e-26		RASAL2	-0.997	1.49e-87		GTPBP4	0.255	1.82e-24		DYRK3	-0.567	1.66e-78
VCP	0.507	1.2e-36		ENSSSCG00000033734	-0.3	1.5e-10		ENSSSCG00000005759	0.263	1.82e-36		RAPGEF5	-0.452	1.67e-64
ENSSSCG00000032436	0.941	1.2e-70		MYO6	-0.253	1.51e-10		MAP1LC3A	0.306	1.83e-27		ENSSSCG00000005247	-0.27	1.68e-32
SRP14	0.549	1.2e-71		STK17B	-0.267	1.52e-21		PTPRE	0.542	1.86e-52		NABP1	-0.538	1.68e-73
CD63	0.983	1.2e-86		RPL23A	-0.254	1.53e-15		ENSSSCG00000030300	0.79	1.86e-69		IRF2BP2	-0.349	1.69e-49
LFNG	0.256	1.21e-27		PNRC1	-0.402	1.54e-25		B2M	0.365	1.88e-70		INTS6	-0.342	1.69e-49
FAM110D	0.346	1.22e-16		JUNB	-0.438	1.54e-29		TSPAN3	0.263	1.89e-21		MT-ND4L	-0.313	1.7e-30
XBP1	0.378	1.22e-49		LDB2	-0.68	1.54e-46		ENSSSCG00000006395	0.315	1.91e-20		H2AFZ	-0.638	1.73e-72
ST3GAL4	0.29	1.22e-53		S100A10	-0.687	1.55e-50		MYADM	0.295	1.94e-18		IRX3	-0.274	1.74e-33
NFKBIB	0.391	1.23e-24		MACF1	-0.45	1.57e-28		EIF3D	0.264	1.95e-23		GCH1	-0.439	1.75e-48
ENSSSCG00000012961	0.324	1.23e-25		CCN2	-0.817	1.57e-55		ENSSSCG00000032436	0.267	2.02e-11		SBSPON	-0.466	1.76e-50
PARP14	0.439	1.23e-27		GADD45G	-0.574	1.58e-26		ORAI1	0.41	2.04e-63		ANXA1	-0.541	1.76e-58
ARF1	0.356	1.24e-16		DENND2C	-0.254	1.6e-07		MESD	0.53	2.04e-98		NOCT	-0.278	1.78e-29
PRDX1	0.28	1.24e-16		RCOR1	-0.275	1.6e-14		IPO11	0.329	2.05e-21		TLE4	-0.605	1.78e-96
RAB18	0.344	1.24e-27		PLVAP	-0.67	1.61e-55		PSPC1	0.358	2.07e-44		RCAN1	-0.312	1.79e-35
ICAM2	0.404	1.24e-56		HSPH1	-0.493	1.62e-27		VASP	0.27	2.09e-17		TUBA1B	-0.486	1.82e-56
MTF2	0.314	1.25e-28		GADD45B	-1254	1.62e-99		ESF1	0.272	2.11e-32		NFKBIE	-0.351	1.89e-37
BDKRB2	0.262	1.25e-29		CD302	-0.353	1.63e-15		ENSSSCG00000006061	0.344	2.12e-32		BPTF	-0.528	1.9e-81
MEMO1	0.265	1.25e-34		LSMEM1	-0.277	1.64e-23		RPS18	0.274	2.14e-21		THOC6	-0.485	1.94e-68
ENSSSCG00000034019	0.332	1.25e-35		BCAM	-0.315	1.66e-12		ARGLU1	0.389	2.15e-37		PBX1	-0.276	1.96e-28
CLTA	0.578	1.25e-43		ENSSSCG00000022322	-0.421	1.66e-22		LHFPL2	0.26	2.16e-44		SAT1	-0.337	1.99e-18
BIN1	0.32	1.26e-80		ENSSSCG00000050403	-0.291	1.67e-23		RPS4X	0.305	2.22e-19		RND3	-0.509	1.99e-55
CCL4	0.617	1.26e-86		ABLIM1	-0.422	1.67e-26		FAM102A	0.673	2.23e-95		NFKB1	-0.295	2.01e-20
IRF7	0.275	1.27e-22		ZNF217	-0.32	1.68e-09		SEC62	0.288	2.26e-18		DAB2	-0.277	2.07e-21
FUBP1	0.403	1.27e-29		SLA-DQB1	-0.947	1.69e-78		RPL22	0.308	2.26e-23		BMPR2	-0.264	2.07e-22
CEBPG	0.281	1.27e-35		PHACTR2	-0.431	1.7e-23		PSMB9	0.269	2.3e-37		RNF19A	-0.329	2.07e-29
PXK	0.285	1.27e-43		ENSSSCG00000039807	-0.274	1.71e-10		ENG	0.386	2.31e-28		DUSP1	-0.666	2.07e-66
RPL26L1	0.299	1.27e-46		MAFF	-0.488	1.72e-23		ENSSSCG00000032235	0.259	2.33e-25		MEX3C	-0.524	2.07e-77
RACK1	0.622	1.28e-36		CYYR1	-0.761	1.72e-56		ENSSSCG00000017509	0.319	2.34e-27		SPTBN1	-0.402	2.08e-31
PSMC5	0.34	1.28e-36		AKAP12	-1194	1.74e-66		RPL21	0.42	2.34e-38		ZC3H12A	-0.316	2.11e-41
HACD2	0.297	1.28e-46		SBSPON	-0.482	1.77e-22		DDX24	0.277	2.48e-17		RIPK1	-0.451	2.11e-50
RHOA	0.426	1.29e-26		ENSSSCG00000038144	-0.386	1.78e-18		SEC11A	0.28	2.54e-42		LDB2	-0.409	2.11e-50
PCNP	0.382	1.29e-33		IGFBP5	-1332	1.78e-94		ENSSSCG00000024974	0.293	2.55e-15		HYAL2	-0.325	2.12e-22
SLC39A14	0.256	1.29e-38		ARHGAP27	-0.465	1.79e-27		RPL30	0.32	2.55e-25		PPP1R12A	-0.275	2.22e-17
THOC1	0.302	1.29e-40		TMEM123	-0.357	1.8e-18		TSKU	0.378	2.55e-55		SOD2	-0.435	2.27e-29
RPS4X	0.669	1.29e-41		APP	-0.413	1.82e-18		NIP7	0.266	2.59e-32		IFIH1	-0.29	2.27e-31
EIF1	0.417	1.31e-20		ENSSSCG00000013361	-0.568	1.83e-33		ZCRB1	0.275	2.6e-44		GAPDH	-0.484	2.27e-56
SMURF1	0.308	1.31e-35		SOX18	-0.445	1.87e-23		CARD19	0.268	2.61e-32		FRMD4B	-0.305	2.28e-39
PSMB3	0.37	1.31e-76		FILIP1L	-0.423	1.88e-17		DEGS1	0.298	2.62e-29		CAVIN1	-0.576	2.31e-84
ENSSSCG00000027840	0.278	1.32e-40		PLD3	-0.291	1.89e-13		ENSSSCG00000013906	0.251	2.69e-17		CAVIN2	-0.551	2.31e-94
SERTAD1	0.547	1.33e-31		CAVIN1	-0.521	1.9e-28		TIMP1	0.934	2.73e-86		DNAJB4	-0.301	2.34e-33
ND1	1079	1.33e-85		PTPRG	-0.258	1.92e-13		RPL6	0.289	2.75e-24		CSRNP1	-0.445	2.36e-51
MAK16	0.286	1.34e-38		ARID4A	-0.26	1.94e-07		ENSSSCG00000010158	0.339	2.76e-33		RBMS3	-0.311	2.37e-31
IGFBP4	0.421	1.34e-57		FAM117A	-0.269	1.94e-19		ENSSSCG00000040118	0.275	2.78e-45		ST8SIA4	-0.326	2.38e-38
MAP2K2	0.359	1.35e-36		CDC42EP4	-0.291	1.95e-13		SSR3	0.293	2.79e-24		FERMT1	-0.504	2.4e-52
TSN	0.268	1.35e-51		PLCL2	-0.253	1.95e-13		SRSF2	0.324	2.79e-25		BCL2A1	-0.452	2.42e-52
HMGB2	0.262	1.36e-21		CCSER1	-0.26	1.95e-22		SCAF11	0.348	2.83e-32		PCF11	-0.365	2.46e-32
MT-CYTB	0.721	1.36e-38		PPFIBP1	-0.345	1.96e-14		SYPL1	0.258	2.85e-20		LTBP1	-0.279	2.47e-21
PPIB	0.683	1.36e-69		PREX2	-0.495	1.96e-33		ENSSSCG00000006777	0.482	2.86e-42		ENSSSCG00000011000	-0.644	2.47e-86
UBE2K	0.325	1.37e-30		PRKCE	-0.476	1.96e-37		PRDX2	0.375	2.89e-35		ERG	-0.397	2.48e-52
EIF3I	0.37	1.37e-31		SMARCA2	-0.659	1.96e-53		FCGRT	0.339	2.9e-25		PALM2AKAP2	-0.314	2.51e-25
DDX46	0.507	1.37e-51		PCMTD1	-0.464	1.99e-26		RPS3	0.413	2.91e-55		ENSSSCG00000006418	-0.44	2.53e-66
GADD45GIP1	0.3	1.37e-70		ENSSSCG00000015880	-0.597	1.99e-36		PLAT	0.375	2.94e-15		FLT1	-0.525	2.54e-55
SLC7A5	0.269	1.37e-71		IRF1	-0.735	1.99e-45		GNPNAT1	0.384	2.94e-38		STAT3	-0.284	2.59e-17
TMA7	0.256	1.38e-19		NOTCH1	-0.322	2e-12		BCL6B	0.289	2.96e-33		LDHA	-0.418	2.59e-46
SEMA5B	0.349	1.38e-30		RNF19B	-0.891	2e-60		CD81	0.394	2.97e-51		DEPP1	-0.29	2.61e-34
CCT4	0.638	1.38e-89		MCC	-0.257	2.02e-13		SRSF4	0.26	2.99e-27		SPRY1	-0.291	2.66e-15
UPP1	0.419	1.38e-95		MMRN2	-0.395	2.02e-16		RPSA	0.298	3.01e-19		EMCN	-0.314	2.71e-24
ENSSSCG00000021576	0.262	1.39e-16		SMARCA1	-0.333	2.06e-16		RPS7	0.289	3.01e-30		ENSSSCG00000009633	-0.402	2.72e-35
ENSSSCG00000050627	0.415	1.39e-23		CRLF1	-0.35	2.06e-17		ZC3H15	0.263	3.02e-31		SAFB2	-0.313	2.75e-25
CAP1	0.299	1.39e-25		STAT1	-0.468	2.06e-21		LFNG	0.494	3.05e-93		GATA2	-0.452	2.75e-49
STRAP	0.283	1.39e-41		LSG1	-0.905	2.12e-70		GRN	0.337	3.07e-22		ENSSSCG00000035037	-0.38	2.77e-28
PHF5A	0.412	1.39e-55		KIAA1109	-0.262	2.18e-13		RPL10	0.418	3.11e-45		KPNA2	-0.41	2.81e-40
MDH2	0.274	1.4e-43		CRYAB	-0.29	2.19e-10		UBAP2L	0.276	3.15e-40		MIDN	-0.308	2.82e-28
RBM25	0.395	1.41e-24		ACAP2	-0.295	2.19e-11		HSPB1	0.418	3.16e-33		PDE4D	-0.303	2.84e-35
SLTM	0.292	1.42e-20		DLL4	-0.713	2.2e-44		SNU13	0.532	3.19e-63		KDR	-0.463	2.85e-43
WTAP	0.315	1.42e-21		LUZP1	-0.676	2.2e-56		ZNF207	0.297	3.2e-27		ZFAND5	-0.382	2.92e-32
ASRGL1	0.313	1.42e-37		AMOTL2	-0.646	2.22e-46		NAA20	0.284	3.28e-25		KLF6	-0.489	2.93e-56
PSMC6	0.398	1.42e-49		DYRK3	-0.453	2.24e-21		HDGF	0.367	3.28e-58		UBR5	-0.494	2.95e-54
CFLAR	0.536	1.42e-66		BAZ2B	-0.475	2.24e-26		TRIOBP	0.277	3.31e-22		ZNFX1	-0.274	2.97e-23
SELENOW	0.413	1.43e-69		EDIL3	-0.534	2.24e-30		SPCS3	0.363	3.32e-42		ENSSSCG00000024555	-0.275	2.97e-41
ARPC2	0.411	1.44e-20		ATP2A2	-0.277	2.28e-10		SMOX	0.269	3.36e-35		RHOB	-0.667	3.02e-70
TBCA	0.312	1.44e-28		HIPK1	-0.267	2.29e-11		CHD9	0.392	3.36e-40		DYNC1I2	-0.279	3.04e-26
CTSV	0.312	1.45e-08		ENSSSCG00000044542	-0.262	2.29e-15		NDFIP1	0.585	3.44e-98		ENSSSCG00000022322	-0.319	3.09e-42
ENSSSCG00000034709	0.359	1.45e-09		SAFB2	-0.383	2.29e-16		ENSSSCG00000011952	0.419	3.46e-47		CEBPB	-0.684	3.13e-80
SYS1	0.418	1.45e-32		GCNT2	-0.303	2.3e-12		CARHSP1	0.669	3.46e-99		ARID4B	-0.286	3.15e-17
PRDX4	0.278	1.45e-59		LIMCH1	-0.575	2.34e-31		RPS3A	0.378	3.52e-29		PLXNA2	-0.391	3.2e-30
RPS7	0.369	1.46e-17		SMTN	-0.301	2.35e-10		PPA1	0.274	3.57e-17		ENSSSCG00000001229	-0.974	3.23e-62
BTG3	0.411	1.46e-21		PDE2A	-0.328	2.35e-18		KTN1	0.328	3.61e-24		DYNLL1	-0.339	3.25e-33
TXNDC17	0.359	1.46e-45		CD34	-0.767	2.36e-56		DHRS3	0.542	3.61e-64		CD36	-0.269	3.34e-17
PSMB7	0.332	1.46e-46		HEXIM1	-0.738	2.36e-56		GJC1	0.581	3.64e-65		EMP1	-0.441	3.42e-39
GORASP2	0.365	1.46e-53		DYSF	-0.25	2.42e-08		CDC42EP5	0.375	3.69e-62		TRIB1	-0.432	3.43e-61
GNB1	0.403	1.47e-18		RAPGEF2	-0.3	2.42e-15		ENSSSCG00000020830	0.257	3.7e-20		SLC9A3R2	-0.524	3.43e-81
LAPTM5	0.276	1.47e-22		TNS1	-0.301	2.43e-15		UBAC1	0.3	3.7e-61		COQ10B	-0.441	3.46e-43
PRXL2A	0.269	1.47e-22		KMT2C	-0.371	2.44e-16		ENSSSCG00000000908	0.271	3.74e-24		PARP14	-0.294	3.65e-29
PNRC2	0.365	1.48e-16		SLC25A25	-0.892	2.44e-65		UBE2B	0.462	3.74e-56		TAF1D	-0.293	3.66e-20
MORF4L1	0.456	1.48e-25		PLXND1	-0.257	2.45e-09		CMPK1	0.28	3.75e-30		TIE1	-0.344	3.67e-33
ENSSSCG00000005768	0.25	1.48e-40		RB1CC1	-0.339	2.45e-11		NUP58	0.25	3.78e-38		ARHGAP31	-0.556	3.68e-78
PLAUR	0.879	1.48e-85		HSPB1	-0.629	2.45e-44		CAVIN3	0.388	3.79e-33		ENSSSCG00000031893	-0.28	3.7e-24
ENSSSCG00000016982	0.317	1.49e-55		TSPAN9	-0.286	2.46e-16		MT-COX1	0.25	3.82e-27		DLL4	-0.269	3.77e-23
UBE2D3	0.652	1.49e-57		SYNE2	-0.682	2.46e-48		ACTG1	0.735	3.83e-82		CLEC14A	-0.394	3.81e-62
ENSSSCG00000002907	0.436	1.49e-63		ZFP36L2	-1204	2.49e-96		ENSSSCG00000004970	0.27	3.87e-22		ENSSSCG00000011493	-0.26	3.82e-23
RUVBL1	0.277	1.49e-71		DNAJB4	-0.298	2.53e-11		BTG3	0.339	3.9e-26		ENSSSCG00000032599	-0.604	3.93e-63
ENSSSCG00000001398	0.332	1.5e-07		ARRDC3	-0.857	2.53e-52		LENG8	0.338	3.95e-70		TUBB4B	-0.642	4e-79
NONO	0.325	1.5e-22		ENSSSCG00000006418	-0.378	2.54e-14		MARK4	0.267	3.98e-24		ABCA1	-0.308	4.01e-48
TAP1	0.505	1.5e-44		RGL2	-0.356	2.56e-15		YRDC	0.395	4e-75		S100A10	-0.304	4.02e-19
ACO1	0.306	1.5e-63		ITGA1	-0.707	2.57e-55		PNN	0.501	4.02e-52		TOPORS	-0.389	4.04e-31
EIF1AX	0.346	1.51e-32		SOCS3	-0.331	2.6e-11		LMO2	0.625	4.03e-69		PPFIBP1	-0.449	4.13e-44
UBE2S	0.409	1.51e-43		DUSP5	-0.286	2.61e-10		RPL7	0.648	4.1e-99		NF1	-0.253	4.2e-25
CD58	0.27	1.51e-43		ALCAM	-0.38	2.63e-24		LRRFIP1	0.281	4.13e-23		DNAJB1	-0.323	4.24e-39
BCL6B	0.422	1.51e-46		ID3	-0.337	2.67e-10		CALR	0.296	4.17e-19		PLCB1	-0.266	4.28e-26
CDC42SE1	0.283	1.51e-52		USP34	-0.278	2.68e-10		RPL7A	0.356	4.25e-56		CLIC2	-0.301	4.31e-38
ENSSSCG00000039071	0.863	1.52e-83		NFAT5	-0.376	2.68e-15		SLC25A36	0.279	4.28e-23		ENSSSCG00000006928	-0.33	4.36e-32
ENSSSCG00000017509	0.286	1.54e-11		ITM2A	-0.319	2.68e-15		TIMP3	0.56	4.28e-61		UTRN	-0.459	4.36e-36
ENY2	0.275	1.54e-16		FLNA	-0.296	2.69e-14		SNRPD1	0.301	4.34e-31		ENSSSCG00000004082	-0.453	4.4e-60
PABPN1	0.301	1.54e-17		DNASE1L3	-0.536	2.69e-25		TNFRSF21	0.385	4.44e-49		PTPN1	-0.502	4.47e-51
OPTN	0.308	1.54e-40		DUSP6	-0.492	2.7e-28		ENSSSCG00000009327	0.537	4.46e-59		NPR1	-0.367	4.49e-49
ATP6V1G1	0.467	1.54e-52		PLXDC2	-0.383	2.72e-25		ENSSSCG00000025928	0.284	4.53e-17		PUM1	-0.258	4.5e-22
UBE2W	0.283	1.54e-58		JMJD1C	-0.881	2.72e-71		PDIA6	0.325	4.61e-29		ELF1	-0.49	4.51e-55
HERC5	0.48	1.54e-75		DOCK9	-0.415	2.75e-18		DNAJA2	0.351	4.61e-39		KDM6B	-0.331	4.52e-23
NCK2	0.309	1.55e-25		LRRC70	-0.578	2.78e-31		NKTR	0.26	4.62e-24		BTG1	-0.336	4.67e-46
TIMM8B	0.303	1.55e-56		STAB1	-0.264	2.8e-20		TSPAN6	0.288	4.79e-19		RTN4	-0.626	4.68e-77
NUCKS1	0.464	1.56e-21		SON	-0.368	2.8e-29		HLA-DRA	0.331	4.8e-15		PCNA	-0.328	4.71e-39
RNASEK	0.264	1.56e-62		CDKN1A	-0.345	2.81e-13		LLPH	0.302	4.81e-42		UPP1	-0.273	4.78e-28
NANS	0.606	1.56e-63		ZBTB10	-0.637	2.87e-36		ENSSSCG00000016970	0.35	4.89e-57		ENSSSCG00000038506	-0.529	4.8e-57
MRPS18A	0.278	1.57e-47		LIMA1	-0.336	2.92e-12		PDXK	0.396	5.01e-55		HIVEP2	-0.546	4.8e-62
MRPL20	0.444	1.57e-79		TMEM88	-0.3	2.94e-20		PNISR	0.261	5.06e-30		ENSSSCG00000026430	-0.335	4.89e-27
RPLP0	0.648	1.58e-32		RPS20	-0.436	2.94e-57		GHITM	0.328	5.08e-32		CCN2	-0.396	4.89e-63
MANF	0.422	1.58e-46		SETX	-0.435	2.96e-17		PCNP	0.334	5.21e-38		ARID5B	-0.524	4.9e-73
TMEM11	0.346	1.58e-47		TLE1	-0.335	2.97e-16		SPP1	0.29	5.27e-05		ANGPTL4	-0.451	4.96e-23
PHF6	0.406	1.58e-49		FUNDC1	-0.39	2.97e-17		ENSSSCG00000039894	0.554	5.3e-71		IRAK2	-0.466	5.02e-50
B3GNT2	0.593	1.58e-91		SELENOP	-0.604	2.98e-47		RPS16	0.411	5.36e-31		CLIC4	-0.596	5.02e-82
PSMD8	0.395	1.59e-42		MCF2L	-0.361	2.99e-29		RAN	0.306	5.38e-20		FJX1	-0.609	5.08e-88
SLC25A6	0.827	1.59e-65		ECE1	-0.29	3.03e-09		MAP2K3	0.335	5.39e-27		EFNA1	-0.341	5.09e-28
RPL15	0.858	1.59e-68		UBR5	-0.404	3.03e-16		ENSSSCG00000003042	0.502	5.42e-58		DDX21	-0.451	5.19e-45
TCF4	0.438	1.6e-15		ENSSSCG00000033010	-0.539	3.1e-31		TAF10	0.323	5.46e-65		CFLAR	-0.515	5.2e-65
HSPA4	0.279	1.6e-21		REL	-0.277	3.11e-08		IFITM3	0.323	5.54e-19		ITGA1	-0.472	5.24e-61
CCND1	0.313	1.6e-24		MEIS2	-0.984	3.13e-77		ENSSSCG00000040879	0.264	5.59e-18		EP300	-0.251	5.27e-25
LEPROTL1	0.343	1.6e-63		ENSSSCG00000035037	-0.78	3.15e-49		SRSF7	0.463	5.62e-43		QKI	-0.382	5.27e-32
SH3GLB1	0.401	1.61e-19		WSB1	-0.79	3.17e-68		ZNHIT6	0.264	5.64e-33		WWTR1	-0.273	5.28e-15
IFI6	0.466	1.61e-22		SETD2	-0.467	3.19e-22		HNRNPA3	0.267	5.7e-16		STPG4	-0.346	5.29e-27
NUTF2	0.393	1.61e-74		PTPRB	-0.761	3.24e-67		KMT2E	0.428	5.71e-41		CLIC5	-0.265	5.29e-38
KIT	0.577	1.61e-87		PCDH17	-0.44	3.26e-22		EMP2	0.382	5.71e-46		PDE4B	-0.4	5.36e-28
SERBP1	1001	1.61e-94		PCF11	-0.622	3.29e-37		TGM2	0.411	5.75e-36		CFD	-0.254	5.4e-27
COX8A	0.309	1.62e-26		DYNLL2	-0.278	3.31e-10		RPL3	0.426	5.82e-46		RGCC	-0.723	5.4e-91
UBQLN1	0.595	1.62e-82		ABR	-0.281	3.36e-12		ENSSSCG00000012427	0.386	5.87e-24		PELI1	-0.403	5.46e-32
SHISA5	0.254	1.63e-21		TPT1	-0.346	3.37e-34		RPL34	0.37	5.89e-27		JUNB	-0.268	5.47e-36
PDAP1	0.41	1.63e-47		BPTF	-0.473	3.38e-24		RBM25	0.27	5.92e-19		DENND4A	-0.304	5.48e-27
COX4I1	0.361	1.64e-13		CDC27	-0.255	3.41e-08		ZRANB2	0.447	5.93e-72		CCL2	-0.734	5.56e-46
ENSSSCG00000014031	0.524	1.64e-28		EFNA1	-0.57	3.42e-35		SRRM1	0.255	5.96e-16		NUFIP2	-0.384	5.63e-31
ELOB	0.332	1.65e-14		MEF2C	-0.287	3.46e-09		TFPI2	0.331	6.08e-39		FEM1C	-0.28	5.63e-31
TRAF2	0.276	1.65e-28		ENPP1	-0.424	3.54e-30		ST3GAL4	0.336	6.08e-90		MYLIP	-0.312	5.71e-41
UBE2L6	0.541	1.65e-81		ICAM1	-0.812	3.56e-59		MTCH1	0.253	6.19e-29		MAFF	-0.298	5.73e-21
LARP1	0.38	1.66e-27		NFIB	-0.618	3.57e-50		SSR2	0.307	6.21e-22		MTUS1	-0.269	5.75e-23
HDAC2	0.355	1.66e-43		NEDD9	-0.93	3.62e-73		CD93	0.6	6.22e-77		DDX3X	-0.579	5.87e-77
PINX1	0.29	1.66e-53		EHBP1L1	-0.365	3.63e-16		DDX17	0.563	6.22e-77		SFPQ	-0.674	5.88e-94
PSMB9	0.57	1.66e-81		ERG	-0.816	3.65e-62		RPS5	0.252	6.26e-16		EDN1	-0.304	5.92e-48
PNO1	0.45	1.66e-85		NUFIP2	-0.602	3.68e-42		GPX4	0.313	6.39e-42		CDKN1A	-0.349	6e-28
GAPDH	0.586	1.67e-29		VWF	-0.334	3.7e-19		ENSSSCG00000029830	0.452	6.42e-52		NFAT5	-0.254	6.03e-15
FAM111A	0.606	1.67e-49		TENT5C	-0.318	3.7e-23		YWHAH	0.344	6.43e-26		SNTB2	-0.358	6.04e-41
SMOX	0.302	1.67e-67		PCP4	-0.563	3.75e-41		CD9	0.577	6.49e-65		ENSSSCG00000033497	-0.26	6.06e-16
TPM3	0.738	1.68e-48		ANGPTL4	-0.834	3.76e-54		CAPNS1	0.25	6.52e-16		TRIM28	-0.291	6.19e-35
NEDD8	0.304	1.68e-48		GLA	-0.298	3.79e-17		PSMB8	0.298	6.56e-36		PER1	-0.312	6.39e-32
MED31	0.271	1.68e-52		PRPF4B	-0.448	3.83e-17		ENSSSCG00000000107	0.646	6.57e-95		TSC22D1	-0.417	6.45e-33
EXOSC4	0.274	1.68e-59		DNM3	-0.284	3.84e-11		DENR	0.302	6.58e-41		FAM167B	-0.405	6.53e-41
SEC61G	0.438	1.69e-24		ARHGAP29	-0.308	3.88e-14		DDIT4	0.744	6.66e-76		CKS2	-0.537	6.53e-71
ENSSSCG00000033041	0.273	1.69e-48		FBN1	-0.264	3.88e-15		FHOD1	0.265	6.69e-24		ANO6	-0.405	6.66e-34
RAB10	0.572	1.69e-76		LMNA	-0.378	3.88e-20		TAGLN	0.399	6.74e-31		MAP3K8	-0.369	6.72e-41
PEA15	0.316	1.7e-22		BTG1	-0.541	3.94e-32		MFRP	0.29	6.83e-74		GLS	-0.461	6.72e-45
CDK2AP1	0.318	1.71e-47		FBLN2	-0.469	3.94e-33		YTHDF2	0.319	6.86e-26		SON	-0.468	6.73e-62
GNG10	0.618	1.72e-56		EPAS1	-0.996	4e-88		WBP2	0.423	6.93e-47		TRA2B	-0.557	6.84e-78
SLC7A1	0.356	1.72e-69		ENSSSCG00000001456	-0.447	4.04e-20		RPL37A	0.255	6.98e-10		PLPP1	-0.616	6.88e-82
ENSSSCG00000040857	0.722	1.72e-83		F8	-0.311	4.05e-24		ENSSSCG00000010954	0.291	6.99e-31		FNDC3B	-0.342	6.91e-34
MARS1	0.319	1.73e-76		NR4A2	-0.824	4.06e-65		CST3	0.431	7.01e-46		ENSSSCG00000004081	-0.269	6.93e-37
NPM1	1029	1.73e-97		IPO11	-0.557	4.09e-31		PUS7	0.28	7.15e-53		CDKN1C	-0.275	6.94e-27
ENSSSCG00000039249	0.272	1.74e-19		INTS6	-0.818	4.09e-63		S100A6	0.605	7.16e-80		CYCS	-0.445	7.03e-43
HSPA9	0.459	1.74e-34		CNKSR3	-0.271	4.1e-15		ENSSSCG00000005656	0.542	7.17e-65		TOP1	-0.575	7.12e-78
RPL31	0.253	1.75e-06		PER1	-0.862	4.1e-73		LAPTM4A	0.375	7.24e-31		WSB1	-0.463	7.21e-47
CHORDC1	0.366	1.75e-28		TRIM72	-0.722	4.11e-62		GGCX	0.439	7.31e-38		RSRC2	-0.298	7.33e-20
RBMX	0.516	1.75e-34		RPS28	-0.455	4.15e-38		SRXN1	0.256	7.44e-49		CBX4	-0.258	7.44e-37
ENSSSCG00000005460	0.317	1.75e-41		CSRNP1	-0.537	4.2e-31		MRTO4	0.256	7.48e-26		ENSSSCG00000004307	-0.409	7.46e-38
HINT1	0.639	1.75e-45		EXTL2	-0.577	4.21e-46		SLC16A13	0.305	7.54e-41		STX11	-0.438	7.56e-50
HYPK	0.44	1.75e-50		UAP1	-0.346	4.22e-14		ANXA5	0.371	7.55e-29		MYC	-0.26	7.66e-17
GHITM	0.542	1.75e-68		LCK	-0.265	4.28e-19		HNRNPU	0.342	7.63e-28		MT-CYTB	-0.312	7.73e-21
PTMA	0.3	1.76e-23		CLIC4	-0.494	4.31e-30		NAP1L1	0.292	7.66e-20		LSG1	-0.378	7.73e-49
CMTM3	0.294	1.76e-40		ARHGAP18	-0.287	4.33e-09		RPS15A	0.262	7.72e-14		EGLN3	-0.414	7.77e-65
SF3B4	0.291	1.77e-29		CTR9	-0.32	4.35e-13		UBE2J2	0.271	7.74e-32		CTSS	-0.258	7.85e-16
SPP1	1420	1.77e-71		ABCG2	-0.389	4.37e-23		GPR4	0.253	8.06e-14		THBS1	-0.755	7.9e-50
NDUFB2	0.264	1.78e-30		SLC44A2	-0.302	4.38e-13		SLC41A1	0.32	8.12e-25		CEMIP2	-0.256	8.07e-22
PHAX	0.392	1.78e-56		ERBIN	-0.397	4.44e-18		RNH1	0.443	8.14e-59		TGFBR2	-0.582	8.19e-73
PABPC1	0.336	1.79e-13		TGFB2	-0.622	4.46e-37		TP53I11	0.312	8.24e-26		RBBP6	-0.41	8.3e-42
NBN	0.253	1.79e-44		ENSSSCG00000032984	-0.252	4.51e-10		RPL36AL	0.338	8.32e-27		TUBB	-0.505	8.32e-57
DDX24	0.702	1.79e-71		C21orf91	-0.276	4.54e-08		HSD11B1L	0.383	8.36e-26		ENSSSCG00000037245	-0.303	8.36e-24
ENSSSCG00000001396	0.326	1.8e-17		CALML4	-0.293	4.57e-21		AOPEP	0.562	8.38e-67		PNP	-0.575	8.4e-57
ADGRG1	0.559	1.8e-47		CHKA	-0.257	4.61e-13		FCHSD2	0.296	8.39e-21		RHOJ	-0.472	8.55e-53
SIPA1L2	0.321	1.81e-53		SGK1	-0.863	4.64e-68		EMILIN2	0.551	8.41e-60		SUPT4H1	-0.396	8.77e-39
NOP10	0.367	1.82e-28		ISYNA1	-0.326	4.66e-17		VMP1	0.494	8.52e-33		DDX23	-0.469	8.84e-66
DOC2B	0.369	1.82e-82		TNS2	-0.77	4.71e-57		ENSSSCG00000033019	0.345	8.6e-23		TXNIP	-0.563	9.02e-77
NUPR1	0.51	1.83e-19		ENSSSCG00000003909	-0.651	4.77e-53		RPL32	0.407	8.6e-47		DUSP6	-0.299	9.07e-51
ORC4	0.281	1.83e-43		IRX3	-0.821	4.79e-57		FAM160A2	0.411	8.63e-37		SLC25A25	-0.341	9.37e-27
DYNLT1	0.277	1.83e-43		PTBP1	-0.383	4.81e-18		VTI1B	0.278	8.63e-38		RASAL2	-0.457	9.38e-51
CCT8	0.542	1.83e-62		AHI1	-0.628	4.84e-36		GET1	0.285	8.63e-53		EGR1	-0.571	9.42e-77
VDAC1	0.331	1.84e-44		ENSSSCG00000001455	-1022	4.86e-86		ROBO4	0.538	8.65e-64		ENSSSCG00000022925	-0.557	9.52e-53
GNL3	0.45	1.85e-86		KLF10	-0.772	4.93e-51		CCL4	0.328	8.72e-28		ZBTB10	-0.357	9.55e-33
SYF2	0.294	1.86e-26		RANBP3L	-0.54	4.97e-36		BIN1	0.372	8.76e-76		RGS16	-0.486	9.55e-60
ENSSSCG00000010058	0.465	1.86e-57		ENSSSCG00000036280	-0.269	5.07e-10		ENSSSCG00000036595	0.479	8.85e-66		RASSF9	-0.257	9.62e-27
ELOVL1	0.584	1.86e-66		ADGRL4	-0.877	5.07e-66		LUC7L3	0.41	9.24e-41		ELL	-0.353	9.63e-28
LGALS8	0.433	1.86e-79		ENSSSCG00000024555	-0.398	5.11e-23		RPL27	0.289	9.25e-19		ZFP36L2	-0.507	9.64e-43
B2M	0.414	1.87e-59		ARL4D	-0.648	5.11e-50		RNMT	0.292	9.45e-36		KLF10	-0.382	9.7e-31
PHLDA2	0.405	1.88e-06		CXCL12	-0.798	5.11e-59		SNRPA1	0.323	9.48e-34		HBEGF	-0.591	9.84e-62
SLC1A5	0.598	1.88e-45		ST8SIA4	-0.263	5.15e-08		RPS9	0.269	9.52e-18		REL	-0.87	1.05e-111
ENSSSCG00000025593	0.525	1.88e-54		ADAMTS4	-0.566	5.15e-22		RPS27A	0.265	9.68e-10		HES1	-1235	1.08e-193
ROBO4	0.37	1.89e-11		DNAH11	-0.31	5.24e-24		RACK1	0.291	9.8e-20		CALCRL	-0.947	1.1e-164
CEBPZ	0.346	1.9e-27		FTL	-0.289	5.26e-14		PDGFA	0.273	1.07e-121		ATF3	-1189	1.17e-208
TAF1D	0.68	1.9e-35		CYBRD1	-0.352	5.26e-17		CCND1	0.646	1.25e-101		RNF19B	-0.845	1.25e-136
ENSSSCG00000037299	0.341	1.9e-37		ITM2B	-0.544	5.26e-38		ENSSSCG00000014569	0.502	1.36e-101		ICAM1	-0.88	1.27e-131
ATP1A1	0.859	1.9e-61		CTSC	-1152	5.26e-98		MAT2A	0.769	1.43e-117		BIRC3	-1232	1.27e-214
UBL5	0.544	1.91e-47		THSD7A	-0.557	5.29e-40		MGLL	0.703	1.45e-101		UBC	-0.88	1.31e-201
MACO1	0.27	1.92e-18		CISH	-0.309	5.33e-15		EGFL7	1130	1.49e-153		EIF4G2	-0.73	1.49e-118
ENG	0.622	1.92e-30		ACIN1	-0.445	5.33e-21		SRSF10	0.756	1.79e-118		TNFAIP3	-1070	1.54e-202
KTN1	0.644	1.93e-46		EGR2	-0.548	5.43e-45		AGPAT2	0.416	2e-153		MYCT1	-0.731	1.55e-105
RASA2	0.375	1.93e-46		ANXA2	-0.335	5.45e-16		PMP22	0.758	2.28e-117		SLC38A2	-1224	1.65e-230
ENSSSCG00000034049	0.273	1.93e-49		EPHA4	-0.422	5.48e-25		NUCKS1	0.712	2.62e-105		ADM	-0.802	1.66e-133
ENSSSCG00000000908	0.458	1.93e-58		ENSSSCG00000016548	-0.488	5.49e-29		CD63	0.864	2.69e-157		LMNA	-0.759	1.7e-130
HIGD1A	0.297	1.93e-63		SLA-DMA	-0.304	5.53e-20		PROCR	0.8	2.76e-108		ARL5B	-0.835	2.04e-115
TNFRSF1A	0.29	1.94e-10		WWC3	-0.314	5.62e-13		AGO2	0.772	3.27e-124		BRD2	-0.79	2.07e-106
OAS2	0.355	1.94e-52		APLP2	-0.381	5.66e-16		ID3	0.781	3.79e-100		ENSSSCG00000004572	-0.99	2.21e-174
PDE4B	0.293	1.95e-14		PHACTR4	-0.261	5.7e-12		A4GALT	0.398	4.55e-103		ENSSSCG00000006286	-1704	2.26e-241
RPS6	0.422	1.95e-15		TGFBR2	-0.955	5.7e-81		RAMP2	0.851	4.92e-138		IL6	-1291	2.32e-117
SCAF11	0.334	1.95e-18		RUNX1T1	-0.364	5.72e-24		NET1	0.649	6.06e-107		NFKBIA	-1333	2.33e-279
PHF20L1	0.356	1.96e-26		ENSSSCG00000029160	-0.682	5.72e-38		TPM4	1176	6.47e-269		ID2	-0.784	2.41e-111
PTPN12	0.406	1.96e-32		RIPK1	-0.431	5.74e-20		METRNL	0.327	6.89e-121		ZFP36	-1026	2.47e-152
PNP	0.413	1.96e-46		PPP2CB	-0.27	5.75e-10		CSRP2	1262	7.06e-248		ADGRL4	-0.743	2.48e-108
TM2D3	0.267	1.96e-66		CASKIN2	-0.679	5.77e-43		RHOQ	0.723	7.52e-167		ENSSSCG00000029160	-1202	2.62e-167
SRSF7	0.288	0.000197		ENSSSCG00000016810	-0.771	5.77e-62		PKIG	0.876	8.69e-126		GADD45A	-0.989	2.66e-168
NDUFB7	0.397	1.97e-91		CLEC14A	-0.528	5.95e-27		H1-0	0.594	8.79e-106		PTPRB	-0.937	2.83e-167
ENSSSCG00000026430	0.33	1.98e-06		ASH1L	-0.32	5.96e-11		GNAT1	0.631	9.4e-123		PNRC1	-0.858	2.87e-132
FRMD4A	0.318	1.98e-24		NUAK1	-0.528	5.97e-36		SLC29A1	0.333	9.87e-110		APOLD1	-1032	2.9e-159
TRMT112	0.381	1.99e-25		BIRC3	-0.279	6.12e-14						SGK1	-0.756	3e-101
NUDT3	0.589	2e-35		PRKD2	-0.384	6.12e-21						UBB	-0.796	3.08e-199
CNIH1	0.276	2e-41		EEF1A1	-0.303	6.14e-46						MBNL1	-0.753	3.17e-104
WDR77	0.284	2e-65		CCL14	-0.585	6.15e-35						IER3	-0.793	3.18e-124
MOB3C	0.268	2.01e-34		MID1	-0.424	6.2e-27						HSPH1	-0.742	3.28e-101
VPS29	0.372	2.01e-38		SH2D3C	-0.435	6.21e-20						PTGS2	-1001	3.62e-100
A4GALT	0.383	2.01e-88		CALM1	-0.567	6.28e-66						PCDH17	-0.563	3.79e-100
PHC2	0.434	2.02e-34		SPRY1	-1237	6.28e-85						FABP5	-1006	3.89e-129
HBS1L	0.39	2.02e-64		PTN	-0.434	6.31e-26						IER5	-0.939	3.97e-162
ENSSSCG00000025060	0.266	2.02e-64		PLK3	-0.364	6.4e-16						CASP10	-0.852	4.2e-125
PSMC3	0.287	2.03e-28		GSK3B	-0.341	6.41e-13						HSPA8	-0.818	4.54e-163
ITGA5	0.491	2.03e-33		HIPK2	-0.286	6.42e-11						BHLHE40	-1102	5.37e-196
NARS1	0.757	2.04e-99		TIPARP	-0.347	6.47e-15						EPAS1	-0.731	5.52e-104
PRKAR1A	0.26	2.05e-10		ENSSSCG00000004572	-0.684	6.47e-33						ATF4	-0.517	5.95e-112
HNRNPA0	0.425	2.05e-22		SMC4	-0.291	6.52e-13						RND1	-1047	5.96e-179
STK24	0.259	2.07e-33		ENSSSCG00000047841	-0.361	6.53e-20						PLK2	-0.748	6.08e-111
AGO2	0.418	2.08e-41		NCOA3	-0.362	6.58e-16						IGFBP5	-1050	6.13e-116
AP3M1	0.396	2.08e-76		RNF122	-0.673	6.63e-39						PPP1R15A	-0.934	6.21e-152
CDH5	0.891	2.08e-80		IER5L	-0.478	6.74e-23						ADAMTS1	-0.965	6.4e-125
RAD23A	0.306	2.09e-33		CDKN1C	-0.587	6.77e-39						TSC22D2	-0.709	6.99e-101
ENSSSCG00000016990	0.354	2.09e-39		ZFP36L1	-0.607	6.8e-49						TM4SF1	-1070	7.1e-145
CARHSP1	0.299	2.13e-15		PPP1R15A	-0.614	6.8e-60						LUZP1	-0.738	7.22e-106
TAF9	0.31	2.13e-59		WDR74	-0.328	6.83e-14						GADD45G	-0.81	7.64e-135
ENSSSCG00000051254	0.296	2.14e-71		PLCB4	-0.361	6.84e-28						CCN1	-1218	8.64e-191
NOLC1	0.674	2.14e-82		EHD4	-0.529	6.85e-32						NEDD9	-0.783	8.68e-121
UBE2M	0.378	2.15e-43		PIEZO1	-0.355	6.87e-19						NFKBIZ	-0.909	9.95e-123
YBX3	0.363	2.16e-08		RBMS3	-0.887	6.87e-77
LENG8	0.365	2.16e-88		ASXL1	-0.317	6.94e-13
YWHAB	0.56	2.18e-56		HBEGF	-0.68	6.98e-38
MED21	0.368	2.18e-74		CALCRL	-0.85	6.99e-74
ARF6	0.289	2.19e-10		FOSB	-1120	7.01e-89
SURF4	0.355	2.2e-41		ENSSSCG00000040410	-0.703	7.1e-44
SF3B1	0.274	2.21e-07		ENSSSCG00000035371	-0.414	7.13e-33
ENSSSCG00000037143	0.435	2.21e-59		ARRDC2	-0.36	7.24e-18
VMP1	1066	2.21e-75		FAM53B	-0.283	7.25e-17
ANKFY1	0.259	2.23e-14		ARHGAP31	-0.281	7.26e-09
ARPC5L	0.654	2.23e-69		ENSSSCG00000022925	-0.859	7.27e-57
GSPT1	0.35	2.24e-17		EMCN	-0.503	7.31e-25
CHMP4B	0.653	2.24e-59		CD36	-0.613	7.39e-51
EIF3B	0.332	2.25e-48		NABP1	-0.436	7.41e-21
PDIA6	0.333	2.26e-26		CCDC80	-0.255	7.52e-12
CD164	0.312	2.26e-29		ENSSSCG00000000697	-0.493	7.56e-23
EFNB1	0.45	2.27e-26		DOCK6	-0.443	7.6e-34
SYNCRIP	0.444	2.27e-28		GADD45A	-1047	7.6e-76
CHCHD1	0.254	2.27e-31		TLE4	-0.631	7.63e-35
APEX1	0.258	2.27e-59		FOXO1	-0.349	7.68e-14
MAGOH	0.394	2.27e-73		NR3C1	-0.293	7.7e-10
EIF4A1	0.307	0.000228		DENND4A	-0.392	7.83e-23
TALDO1	0.306	2.29e-38		TMEM204	-0.622	7.85e-46
ENSSSCG00000009327	0.788	2.29e-52		KLF7	-0.533	8.01e-28
ENSSSCG00000022760	0.523	2.32e-28		PSAP	-0.354	8.21e-16
SEMA3D	0.304	2.33e-09		IRF2BP2	-0.358	8.27e-18
STX11	0.404	2.33e-43		RNF19A	-0.461	8.34e-20
GNAT1	0.336	2.33e-75		FRYL	-0.266	8.43e-12
ENSSSCG00000020808	0.591	2.33e-95		TEK	-0.911	8.46e-71
TFPI2	0.459	2.34e-56		MKNK2	-0.402	8.53e-17
NAMPT	0.272	2.35e-13		HLA-DRA	-0.73	8.59e-45
UBXN1	0.311	2.36e-19		RPS6KA3	-0.341	8.62e-15
ENSSSCG00000007743	0.57	2.36e-45		FMNL2	-0.449	8.64e-27
EMG1	0.458	2.36e-57		KLF6	-0.713	8.69e-48
KDSR	0.33	2.39e-29		ENSSSCG00000005358	-0.269	8.7e-09
HNRNPU	0.258	0.00024		CRIM1	-0.895	8.72e-71
RBM5	0.367	2.4e-30		TTC3	-0.306	8.73e-14
KPNB1	0.299	2.41e-11		HLTF	-0.269	8.81e-08
RPL17-C18orf32	0.429	2.41e-16		SLC4A11	-0.494	8.87e-41
IDH2	0.368	2.41e-53		TSC22D2	-0.672	8.95e-43
FBL	0.622	2.41e-96		ZBTB38	-0.317	8.98e-15
NOB1	0.29	2.42e-69		RPS11	-0.352	8.99e-31
NSA2	0.289	2.43e-28		TSPAN4	-0.257	9.07e-13
PSMD1	0.398	2.43e-48		HIVEP2	-0.577	9.13e-32
SRM	0.388	2.46e-77		PLIN5	-0.573	9.16e-43
YWHAZ	0.329	2.47e-14		TXNIP	-1292	9.36e-94
HSPA13	0.323	2.47e-43		CAVIN2	-1070	9.4e-90
UTP3	0.295	2.47e-47		ZBTB11	-0.309	9.75e-15
ENSSSCG00000050966	0.402	2.47e-55		STPG4	-0.361	9.75e-23
PPP4R2	0.285	2.49e-21		RPL26	-0.573	9.81e-65
GINM1	0.375	2.5e-55		SLC9A3R2	-1480	1.12e-152
CSNK1A1	0.353	2.51e-11		GATA2	-1288	1.28e-105
HNRNPM	0.368	2.51e-23		NR4A1	-1853	1.31e-175
MTDH	0.627	2.51e-42		APOLD1	-1999	1.46e-173
COX7A2	0.469	2.53e-50		ID2	-1678	1.51e-149
ATP5MC3	0.514	2.54e-70		ADAMTS1	-2444	1.64e-224
ENSSSCG00000012006	0.484	2.55e-71		CCN1	-1327	1.78e-106
ANKRD28	0.392	2.58e-22		DUSP1	-2099	2.04e-224
RPSA	0.727	2.58e-49		THBS1	-1529	2.23e-119
ENSSSCG00000044700	0.577	2.6e-63		ID1	-1480	2.39e-132
ATAD1	0.494	2.6e-74		SLC38A2	-1418	2.56e-183
RAD23B	0.31	2.62e-35		FABP5	-2801	2.62e-276
WDR12	0.286	2.62e-58		ATF3	-1738	2.84e-160
EIF3M	0.44	2.62e-63		ZFP36	-1244	2.92e-111
TNFRSF1B	0.366	2.64e-16		RGCC	-1079	2.93e-113
NFE2L2	0.423	2.65e-33		PLK2	-1403	3.04e-116
SMIM7	0.417	2.65e-49		EGR1	-1607	3.05e-138
RGS16	0.279	2.66e-08		DDIT4	-1306	3.41e-123
CNOT4	0.305	2.66e-16		ENSSSCG00000033262	-1086	3.71e-234
RBM18	0.565	2.67e-49		KANK3	-1430	3.75e-147
NDFIP2	0.288	2.69e-26		BRD2	-1733	4.04e-181
IFNGR1	0.347	2.69e-52		CLEC3B	-1511	4.27e-192
SMAD3	0.314	2.69e-58		KLF4	-1569	4.62e-140
G3BP1	0.814	2.69e-91		TIMP3	-1371	4.79e-158
PSMC2	0.286	2.7e-53		UBC	-1151	4.95e-163
ENSSSCG00000000657	0.368	2.71e-59		PLPP1	-1288	5e-121
AP1S1	0.269	2.71e-64		BHLHE40	-1222	5.01e-110
NTAN1	0.448	2.72e-50		CXCL2	-2241	5.03e-198
EIF3J	0.522	2.72e-54		FOS	-1811	5.35e-154
GPRC5B	0.434	2.73e-62		SPTBN1	-1637	5.43e-177
TSSC4	0.335	2.76e-68		ENSSSCG00000038215	-1227	5.48e-111
TMEM50A	0.303	2.77e-30		PPP1R10	-1341	9.12e-106
SEC61A1	0.408	2.77e-58		KLF2	-1935	9.23e-176
NDUFA8	0.286	2.78e-42
ENSSSCG00000001341	0.658	2.79e-40
IARS1	0.272	2.79e-43
DPF2	0.256	2.79e-44
TMEM165	0.392	2.79e-46
PLEKHA7	0.354	2.8e-46
IMP3	0.333	2.8e-79
TRIM22	0.339	2.83e-36
DSTN	0.837	2.83e-82
ENSSSCG00000038947	0.36	2.85e-25
IL6ST	0.548	2.86e-24
PSPC1	0.335	2.87e-38
RPS17	0.344	2.88e-12
ENSSSCG00000005478	0.313	2.88e-47
ACTR3	0.354	2.89e-18
RPL32	0.326	2.89e-18
TAF10	0.25	2.89e-35
RBMS1	0.329	2.9e-14
ENSSSCG00000033700	0.318	2.9e-50
KLHL15	0.456	2.91e-43
GRIPAP1	0.381	2.92e-75
FCHSD2	0.469	2.93e-32
ENSSSCG00000003520	0.635	2.93e-46
HNRNPA2B1	0.8	2.93e-55
GNAI2	0.669	2.94e-44
ISG12(A)	0.707	2.94e-48
POMP	0.424	2.95e-53
MRPL55	0.268	2.96e-47
CTDSP2	0.284	2.97e-22
SAFB	0.364	2.97e-24
SRPK2	0.285	2.97e-31
PSMD14	0.317	2.97e-80
ENSSSCG00000031838	0.34	2.98e-16
RPL27	0.686	2.98e-46
PHF11	0.639	2.98e-83
ENSSSCG00000033653	0.556	3e-45
ENSSSCG00000033019	0.822	3e-61
SLC39A6	0.323	3.01e-69
PRMT1	0.599	3.02e-55
PFN1	0.535	3.02e-56
RNMT	0.455	3.02e-64
PITPNB	0.282	3.03e-17
CAPNS1	0.478	3.03e-30
ENSSSCG00000011272	0.654	3.03e-38
RCC2	0.344	3.03e-44
DHRS3	0.87	3.04e-71
RPS15A	0.977	3.04e-82
ALYREF	0.294	3.06e-12
RAB5A	0.303	3.06e-17
ENSSSCG00000007692	0.282	3.06e-19
COPS2	0.273	3.06e-25
TNFAIP1	0.366	3.08e-35
PMP22	0.67	3.08e-39
MRPL41	0.29	3.09e-73
EML4	0.309	3.1e-19
ARCN1	0.28	3.1e-33
F11R	0.53	3.1e-56
ATP5F1C	0.338	3.11e-69
LMO2	0.717	3.12e-48
CDV3	0.261	0.000313
RDH10	0.766	3.14e-50
ENSSSCG00000022176	0.689	3.15e-44
ASNS	0.297	3.15e-50
MED4	0.621	3.18e-86
PSMB4	0.553	3.19e-82
NME1	0.313	3.19e-85
RASGEF1A	0.469	3.19e-90
HSPA5	0.559	3.2e-19
TMBIM1	0.381	3.21e-42
BTF3	0.769	3.21e-66
NKTR	0.366	3.23e-24
CASP3	0.325	3.25e-62
HNRNPA3	0.827	3.26e-64
IPO5	0.491	3.26e-65
LAMB1	0.368	3.27e-71
ENSSSCG00000039612	0.402	3.27e-90
NET1	0.35	3.28e-35
NDUFB9	0.629	3.28e-86
EIF3D	0.367	3.29e-32
SEC63	0.37	3.3e-38
IFIT5	0.482	3.31e-99
RPL4	0.254	3.33e-05
ENSSSCG00000011952	0.573	3.33e-32
RAMP2	0.552	3.38e-24
EIF1B	0.717	3.38e-75
POLR2K	0.56	3.39e-31
FERMT1	0.434	3.4e-48
C7H6orf125	0.354	3.4e-85
ENSSSCG00000025928	0.34	3.41e-10
SPCS1	0.279	3.41e-39
GJC1	0.636	3.41e-65
MIF	0.672	3.41e-66
WWTR1	0.515	3.43e-24
RAB5C	0.319	3.45e-24
NRF1	0.297	3.47e-43
GTPBP4	0.344	3.47e-51
MPHOSPH10	0.349	3.47e-60
YPEL5	0.347	3.49e-45
EPHB4	0.254	3.5e-25
KIN	0.316	3.51e-19
KHSRP	0.256	3.53e-19
DDX17	0.336	3.54e-13
PGM2	0.656	3.54e-73
MYBBP1A	0.26	3.55e-32
ENSSSCG00000044051	0.591	3.55e-53
ENSSSCG00000033310	1076	3.56e-88
YAP1	0.301	3.57e-22
ENSSSCG00000000405	0.428	3.57e-32
FURIN	0.289	3.59e-22
STK40	0.319	3.6e-35
NDUFV2	0.444	3.6e-93
MOBKL3	0.384	3.61e-36
ENSSSCG00000032166	0.299	3.62e-53
MT-ND3	0.985	3.62e-66
CMPK1	0.297	3.63e-40
RTRAF	0.435	3.63e-47
WDR43	0.358	3.67e-58
PSMB8	0.618	3.69e-69
DNTTIP2	0.309	3.7e-33
PPP1CB	0.304	3.71e-26
MCAM	0.355	3.72e-28
ELAVL1	0.389	3.78e-44
PDE4D	0.339	3.81e-24
RPS23	0.642	3.82e-37
PAK1IP1	0.399	3.84e-75
TCF7	0.291	3.85e-20
PTGS2	0.447	3.85e-22
MAP4K4	0.376	3.85e-24
SNRPF	0.381	3.86e-37
STAT5A	0.346	3.86e-54
LRCH3	0.278	3.89e-30
C11orf58	0.623	3.9e-66
LDLRAD3	0.565	3.9e-67
TXNL1	0.697	3.92e-88
PFDN2	0.48	3.95e-34
THUMPD1	0.358	3.95e-58
METAP2	0.256	3.97e-22
PSMD13	0.28	3.97e-29
NIP7	0.29	3.99e-50
MT-ND4	0.356	4.01e-08
GLUL	0.342	4.03e-09
SUMO2	0.959	4.04e-90
ENSSSCG00000009211	0.357	4.05e-38
ENSSSCG00000001930	0.683	4.06e-49
ENSSSCG00000007524	0.414	4.07e-26
CXCL10	0.584	4.09e-51
PSMA5	0.505	4.11e-89
CNOT7	0.269	4.12e-36
DKC1	0.49	4.14e-61
CAPZB	0.309	4.16e-35
WDFY1	0.328	4.16e-38
CCNL2	0.295	4.17e-14
RPS13	0.534	4.18e-28
CCAR1	0.267	4.18e-28
FOSL1	0.307	4.18e-71
MPHOSPH8	0.258	4.19e-14
PLSCR3	0.251	4.2e-34
SSR1	0.436	4.2e-38
ENSSSCG00000017913	0.284	4.24e-30
APH1A	0.268	4.27e-45
MLKL	0.312	4.31e-57
CCT5	0.659	4.31e-80
ENSSSCG00000000576	0.37	4.32e-22
TNFAIP8L1	0.376	4.32e-48
TARS1	0.401	4.32e-64
SNRPC	0.255	4.33e-30
PDGFA	0.258	4.33e-72
DYNLRB1	0.695	4.33e-89
RPIA	0.459	4.35e-58
ARPC3	0.451	4.35e-60
ENSSSCG00000003042	0.522	4.36e-31
MTERF3	0.362	4.36e-47
C12orf45	0.301	4.37e-62
ENSSSCG00000030849	0.445	4.39e-17
NDST1	0.38	4.39e-68
ENSSSCG00000024313	0.457	4.4e-26
IPO4	0.333	4.41e-40
CACYBP	0.586	4.41e-90
ENSSSCG00000002963	0.33	4.42e-18
ENSSSCG00000038963	0.298	4.46e-32
UQCRFS1	0.252	4.47e-44
DENR	0.441	4.5e-72
CFL1	0.522	4.51e-25
HNRNPH1	0.701	4.51e-41
ATP5MC1	0.299	4.52e-27
LRRC59	0.252	4.52e-32
JARID2	0.262	4.53e-05
ERP44	0.34	4.53e-57
RASA1	0.323	4.54e-36
EIF3A	0.393	4.56e-21
PTP4A2	0.541	4.56e-46
RPS18	0.279	4.59e-14
ENSSSCG00000003839	0.564	4.6e-35
SRPK1	0.348	4.6e-40
ECPAS	0.275	4.62e-29
EAF1	0.254	4.62e-29
RELB	0.352	4.62e-42
COX6A1	0.527	4.62e-54
PDXK	0.51	4.63e-57
PPAN	0.294	4.64e-68
KPNA4	0.305	4.65e-25
TRIR	0.315	4.65e-27
RSL24D1	0.369	4.66e-49
IFITM3	0.729	4.66e-55
MRPS7	0.285	4.69e-69
BRWD1	0.325	4.7e-16
VAPA	0.36	4.7e-25
TMEM30A	0.343	4.7e-35
STC1	0.427	4.7e-44
FBXW11	0.274	4.71e-13
NRIP1	0.449	4.71e-26
EIF3E	0.448	4.71e-51
SELENOT	0.454	4.73e-49
ENSSSCG00000024973	0.404	4.76e-14
SRPRA	0.499	4.76e-41
ENSSSCG00000021560	0.341	4.78e-42
CCDC59	0.258	4.79e-25
RPS16	0.628	4.79e-34
UNC5B	0.29	4.79e-37
ABCE1	0.305	4.8e-52
MSN	0.265	0.000483
TUBB	0.578	4.86e-28
ENSSSCG00000006928	0.391	4.87e-28
RASGRP3	0.365	4.89e-33
CLK1	0.642	4.89e-39
ENSSSCG00000039894	0.624	4.91e-46
HDGF	0.296	4.92e-23
ENSSSCG00000001414	0.351	4.93e-27
HNRNPH3	0.711	4.93e-64
GPX1	0.735	4.93e-86
EXOC5	0.345	4.94e-48
CCL2	1247	4.94e-66
SLC25A3	0.368	4.95e-13
SLC16A13	0.261	4.95e-21
LPGAT1	0.465	4.96e-47
SMAD1	0.567	4.98e-47
DDX21	0.259	4.99e-05
CAST	0.331	5e-24
FAM32A	0.285	5.01e-36
RPS27A	0.655	5.01e-39
MAP1LC3B	0.257	5.02e-19
STK4	0.37	5.02e-55
TNFRSF21	0.513	5.02e-71
ENSSSCG00000048263	0.366	5.03e-41
ZRANB2	0.476	5.06e-62
IFIH1	0.279	5.08e-15
TMED5	0.413	5.08e-25
TSC22D1	0.291	5.09e-06
GMPS	0.303	5.12e-34
DYRK2	0.371	5.12e-38
SYPL1	0.438	5.13e-35
TERF2IP	0.403	5.13e-45
TCEA1	0.318	5.15e-21
GPR4	0.385	5.16e-18
RPS15	0.672	5.16e-40
SNRPG	0.584	5.17e-80
RBM8A	0.497	5.18e-31
RGS3	0.263	5.21e-26
DDX5	0.541	5.21e-29
TRIM25	0.336	5.21e-31
SNRNP70	0.531	5.21e-44
RPS21	0.402	5.22e-16
ENSSSCG00000021815	0.312	5.23e-80
SSB	0.808	5.25e-80
PRKD3	0.296	5.27e-20
RPL7L1	0.258	5.29e-17
RPL37A	0.494	5.29e-29
ENSSSCG00000010158	0.545	5.34e-64
ZFAND5	0.472	5.39e-26
ENSSSCG00000014997	0.417	5.39e-43
IFI44L	0.388	5.39e-51
SLC41A1	0.537	5.39e-81
ENSSSCG00000007203	0.268	5.4e-31
CWC15	0.262	5.4e-45
VDAC2	0.588	5.41e-69
PSMD11	0.468	5.43e-79
HSPD1	0.27	5.44e-15
ENSSSCG00000001696	0.303	5.44e-46
ENSSSCG00000026996	0.272	5.45e-43
MT-ND6	0.421	5.46e-57
MRPL40	0.282	5.46e-57
PSMA1	0.438	5.47e-69
SLC11A2	0.264	5.47e-73
SMNDC1	0.512	5.49e-40
DNAJA2	0.532	5.53e-57
ARHGEF2	0.311	5.55e-27
ENSSSCG00000013318	0.306	5.55e-52
NAA20	0.639	5.57e-71
CSNK2A2	0.339	5.59e-33
LSM8	0.292	5.59e-54
CD79A	0.332	5.6e-58
TMED2	0.419	5.6e-62
PTPRE	0.915	5.68e-85
PPA1	0.664	5.7e-43
ENSSSCG00000013889	0.284	5.72e-10
SRSF11	0.415	5.73e-25
LARS1	0.282	5.82e-33
ENSSSCG00000012427	0.579	5.87e-25
ENSSSCG00000025499	0.657	5.9e-72
PSMA7	0.399	5.91e-30
NRBP1	0.26	5.92e-28
EWSR1	0.253	5.94e-13
TM4SF18	0.49	5.95e-40
IVNS1ABP	0.273	5.98e-13
DNAJC8	0.361	5.98e-30
ENSSSCG00000006395	0.722	6e-40
RND1	0.79	6e-51
SMC3	0.26	6.01e-12
CMPK2	0.395	6.01e-91
SNAPC1	0.404	6.02e-21
UBE2D2	0.401	6.02e-44
LSM7	0.384	6.02e-60
SMARCE1	0.373	6.03e-64
PSMA3	0.623	6.03e-68
ENSSSCG00000005453	0.686	6.04e-38
PDIA5	0.605	6.04e-58
ENSSSCG00000037445	0.257	6.05e-34
CDC42EP2	0.322	6.06e-15
MBD2	0.44	6.08e-40
MED27	0.253	6.13e-41
CD81	0.788	6.13e-70
ENSSSCG00000017146	0.286	6.16e-15
HSPE1	0.435	6.17e-28
PSMD6	0.279	6.17e-61
FAM102A	0.317	6.19e-25
ENSSSCG00000029830	0.64	6.19e-51
CYC1	0.425	6.19e-68
SH3GL1	0.355	6.2e-43
HNRNPR	0.39	6.23e-28
TMEM26	0.437	6.23e-62
ARPC1B	0.426	6.25e-48
ZPR1	0.291	6.28e-36
DYNC1I2	0.259	6.29e-15
ENSSSCG00000036556	0.312	6.3e-23
ENSSSCG00000000097	0.328	6.34e-45
HERC6	0.589	6.34e-59
SRRM1	0.427	6.41e-15
ENSSSCG00000010203	0.494	6.41e-22
IPO7	0.491	6.41e-58
AKR1B1	0.298	6.42e-26
ECHS1	0.332	6.42e-51
SOD1	0.26	6.43e-11
ENSSSCG00000034927	0.354	6.43e-33
MRPL57	0.446	6.43e-75
DRAP1	0.274	6.49e-22
USP15	0.287	6.5e-12
JAG1	0.447	6.5e-42
RAB2A	0.347	6.52e-15
VAT1	0.438	6.54e-49
TSPAN3	0.4	6.55e-31
ENSSSCG00000006996	0.272	6.57e-58
UOX	0.642	6.59e-45
HSBP1	0.262	6.6e-25
PGK1	0.466	6.6e-47
SYT7	0.316	6.61e-24
CSTB	0.498	6.61e-31
HSP90AB1	0.631	6.63e-43
ARPC4	0.307	6.65e-29
ENSSSCG00000016737	0.637	6.65e-38
LYPLA1	0.256	6.67e-46
YTHDF2	0.723	6.68e-77
RPL7	0.798	6.69e-58
CCNYL1	0.395	6.72e-18
ENSSSCG00000009633	0.41	6.74e-12
TM9SF3	0.325	6.74e-27
ZNF326	0.267	6.77e-17
FAM98A	0.274	6.8e-49
POLR2F	0.39	6.87e-32
CCNL1	0.353	6.88e-05
ILF2	0.528	6.9e-65
ENSSSCG00000027538	0.298	6.91e-41
SNRPD2	0.254	6.92e-11
TMED4	0.283	6.92e-27
DPM1	0.388	6.92e-57
ENSSSCG00000036114	0.329	6.97e-15
CCT7	0.457	6.98e-47
ENSSSCG00000040879	0.826	6.98e-72
ENSSSCG00000003079	0.27	6.99e-09
NOP56	0.513	6.99e-36
SDCBP	0.593	7.01e-29
ATP5IF1	0.418	7.01e-62
CSDE1	0.3	7.02e-16
LSM14A	0.317	7.02e-28
BATF3	0.549	7.02e-90
HSP90B1	0.354	7.03e-11
SEPTIN10	0.268	7.03e-29
SEC11A	0.413	7.07e-71
CEP192	0.441	7.07e-76
VPS36	0.299	7.13e-32
MAMDC4	0.274	7.13e-43
RPL6	0.328	7.14e-09
RPL5	0.373	7.15e-11
GALNT1	0.639	7.17e-30
ELOC	0.362	7.18e-38
SLC39A1	0.345	7.19e-40
PCMT1	0.42	7.19e-57
TMED10	0.453	7.21e-33
JPT1	0.304	7.21e-39
RPL36AL	0.597	7.23e-39
ANXA5	0.566	7.26e-40
DHX15	0.314	7.27e-31
CARS1	0.479	7.3e-58
ERH	0.48	7.3e-66
SAT1	0.292	0.00731
CD47	0.536	7.33e-28
ZNFX1	0.341	7.37e-13
DNAJC5	0.26	7.41e-56
NPEPPS	0.289	7.44e-38
COL4A2	0.498	7.46e-49
WFDC1	0.459	7.49e-35
SMURF2	0.361	7.53e-20
SPCS2	0.253	7.55e-23
OLR1	0.345	7.55e-79
CLEC2B	0.335	7.56e-07
UBE2B	0.415	7.56e-25
MGLL	0.586	7.56e-75
RHEB	0.398	7.58e-23
MRPL15	0.252	7.59e-79
AOPEP	0.409	7.61e-20
KIF5B	0.335	7.64e-18
ENSSSCG00000039656	0.284	7.64e-36
LRRC42	0.275	7.66e-27
MAP2K3	0.287	7.7e-08
PKIG	0.344	7.71e-74
CDC34	0.294	7.74e-41
ENSSSCG00000027746	0.254	7.75e-13
RPF1	0.306	7.77e-53
PSMD3	0.327	7.8e-31
TMCO1	0.428	7.81e-52
ATXN2L	0.392	7.84e-48
EEF1G	0.325	7.91e-08
ENSSSCG00000000473	0.314	7.93e-27
NUB1	0.425	7.95e-22
CEBPB	0.974	7.95e-91
CAPZA1	0.328	8.02e-40
TPM4	0.26	8.09e-05
NT5C2	0.293	8.12e-51
SSR3	0.653	8.13e-98
PAPOLG	0.274	8.14e-42
GALNT18	0.571	8.15e-50
XRN2	0.271	8.16e-19
ATP5ME	0.347	8.18e-39
EPRS1	0.461	8.19e-68
GPATCH4	0.359	8.22e-84
ENSSSCG00000033697	0.373	8.23e-18
RPL3	0.547	8.23e-31
TOMM40	0.257	8.23e-40
LMAN1	0.304	8.25e-33
ARL6IP5	0.337	8.27e-32
COX5B	0.461	8.28e-44
COX5A	0.259	8.31e-35
TIMM17B	0.259	8.31e-43
MYSM1	0.33	8.32e-58
MLLT11	0.353	8.37e-73
ENSSSCG00000015730	0.499	8.39e-55
PTPN2	0.438	8.41e-52
SEMA3F	0.292	8.47e-27
PSMC1	0.375	8.47e-86
EVA1B	0.35	8.53e-37
TRIM44	0.294	8.66e-29
GEM	0.267	8.67e-09
RPL34	0.447	8.72e-16
BZW1	0.81	8.74e-75
SKP1	0.304	8.77e-17
RRP15	0.457	8.81e-59
RCL1	0.299	8.81e-63
RAC1	0.71	8.83e-45
CRK	0.558	8.85e-31
TLNRD1	0.531	8.89e-44
SSR4	0.618	8.9e-74
EIF4A2	0.496	8.91e-17
HNRNPA1	0.537	8.95e-25
NFKB2	0.532	8.97e-62
CCDC85B	0.317	9.01e-42
HSPA8	0.61	9.02e-33
MAPRE2	0.408	9.03e-16
GLRX3	0.286	9.03e-50
TGIF1	0.275	9.08e-12
TMBIM6	0.507	9.11e-26
PPP4R3A	0.364	9.12e-25
TUBA1B	0.562	9.2e-22
PSMD2	0.412	9.2e-56
BTF3L4	0.442	9.26e-76
PDLIM7	0.572	9.32e-72
ZBTB22	0.304	9.33e-25
BCAP31	0.313	9.34e-31
MYO10	0.272	9.37e-24
CEMIP2	0.434	9.4e-42
TSPAN14	0.291	9.41e-22
LRPPRC	0.255	9.41e-47
SEC11C	0.272	9.42e-72
ENSSSCG00000031169	0.263	9.44e-37
RPL35A	0.397	9.48e-15
IL17RA	0.339	9.48e-58
NDUFA5	0.362	9.49e-63
VPS4B	0.298	9.55e-28
ATP6V0B	0.253	9.55e-28
LAPTM4A	0.566	9.56e-30
YRDC	0.376	9.56e-59
EPSTI1	0.296	9.59e-65
ENSSSCG00000039635	0.311	9.61e-96
DDX39B	0.328	9.68e-19
TRIM56	0.252	9.69e-55
ZNF24	0.282	9.7e-39
EIF4H	0.558	9.7e-43
ENSSSCG00000024974	0.521	9.71e-29
SNRPE	0.539	9.71e-83
GTPBP3	0.255	9.73e-57
MLF2	0.32	9.75e-29
MYO5A	0.536	9.76e-49
NAV2	0.256	9.8e-24
ADRM1	0.299	9.86e-37
FAM160B1	0.276	9.86e-42
PRPF40A	0.293	9.87e-14
ENSSSCG00000001064	0.262	9.89e-26
PFDN6	0.319	9.89e-78
PNN	0.95	9.9e-85
WSB2	0.261	9.91e-34
SEMA6B	0.258	9.92e-54
ENSSSCG00000038719	0.471	9.94e-38
CAPZA2	0.517	9.94e-40
ATP5F1A	0.477	9.98e-42
ACSL4	0.385	9.98e-59
ATP5PB	0.548	1.02e-101
PSMA4	0.522	1.08e-101
SLC29A1	0.573	1.12e-166
TSPAN15	1010	1.12e-228
M6PR	0.807	1.14e-102
USP18	0.532	1.14e-120
MFRP	0.431	1.2e-112
RELL1	0.989	1.2e-251
MX1	1019	1.24e-126
CD9	1878	1.24e-231
GARS1	1023	1.25e-259
ENSSSCG00000033952	0.53	1.28e-140
EMILIN2	1072	1.28e-188
MESD	0.557	1.32e-100
UBE2E2	0.356	1.34e-111
ENSSSCG00000005656	1005	1.4e-115
SRSF10	1091	1.42e-123
ABL2	0.967	1.43e-191
MX2	0.985	1.45e-137
PSMB2	0.744	1.52e-122
IFIT1	0.831	1.54e-126
C15orf48	1070	1.57e-267
CASP7	1439	1.65e-259
RPL21	1066	1.66e-105
ENSSSCG00000031381	1008	1.66e-117
PRDX2	1018	1.66e-130
FHOD1	0.571	1.68e-102
SDF4	0.968	1.71e-133
ARGLU1	0.927	1.75e-110
MT1A	0.678	1.75e-110
TMEM208	0.506	1.76e-102
MRPL17	0.863	1.82e-100
ENSSSCG00000041731	0.599	1.82e-112
ENSSSCG00000032591	1242	1.9e-109
SELENOS	0.955	1.92e-135
VCAM1	2522	1.95e-296
OAS1	0.828	1.98e-102
SDCBP2	0.667	1.99e-145
EMP3	1032	2.13e-271
SEPTIN11	0.914	2.14e-123
SLC4A7	1147	2.16e-263
ENSSSCG00000049691	0.937	2.16e-263
RWDD1	0.614	2.23e-110
EGFL7	1297	2.23e-116
SNRPD1	0.694	2.28e-118
DEGS1	0.65	2.33e-127
CCT3	0.78	2.34e-112
PPP1R14B	0.708	2.42e-105
CSRP2	0.545	2.42e-111
ENSSSCG00000030183	0.359	2.55e-100
PSMD7	0.816	2.58e-148
ENSSSCG00000010954	0.588	2.63e-102
NME2	0.96	2.7e-110
SEC61B	0.697	2.81e-101
ENSSSCG00000017754	1048	2.81e-122
MAT2A	1094	2.85e-102
PLAT	2581	2.87e-300
EIF2S2	0.986	2.9e-130
CCL5	0.638	2.91e-133
ATP5MG	0.685	3.21e-111
SAP18	0.926	3.24e-105
ATP1B1	1310	3.25e-143
TIMP1	2073	3.25e-215
EIF2AK2	1059	3.42e-130
LYVE1	0.545	3.56e-146
ENSSSCG00000006286	1823	3.68e-109
RAN	1046	3.76e-122
ENSSSCG00000007609	0.838	3.8e-114
PSMB10	0.518	3.86e-102
RANBP1	1009	3.99e-144
ENSSSCG00000038359	0.93	4.02e-130
GGCX	1091	4.16e-130
LLPH	0.499	4.23e-102
ENSSSCG00000007188	1028	4.35e-106
ENSSSCG00000014351	1565	4.46e-234
S100A11	1130	4.75e-174
ENSSSCG00000017920	1573	4.81e-215
SWAP70	1052	4.91e-116
RBM3	0.935	5.06e-125
SAMHD1	0.574	5.08e-142
ENSSSCG00000014565	1639	5.19e-205
PSMA6	0.796	5.23e-155
CD200	1175	5.3e-174
ENSSSCG00000038351	0.417	5.34e-158
SNRPA1	0.719	5.35e-145
PROCR	1228	5.42e-255
FJX1	0.975	5.53e-138
PSME2	1141	5.77e-214
SRSF2	0.854	5.85e-113
ENSSSCG00000006777	1368	5.88e-230
TM4SF1	1408	5.97e-148
CDC42EP3	0.756	5.98e-158
SOD2	1790	6.02e-198
F2RL3	0.436	6.72e-140
SARS1	1008	6.77e-163
EIF4EBP1	1017	6.79e-273
ENSSSCG00000036224	0.812	6.8e-152
ACKR1	0.536	6.81e-150
PSMB1	0.582	6.86e-105
VEGFC	0.553	6.91e-185
EIF6	1233	6.95e-226
ACSL5	0.578	6.98e-134
P2RY6	0.463	7.41e-129
SPCS3	0.796	7.41e-138
ISG15	1710	7.51e-185
C1orf21	0.587	7.54e-164
RNH1	0.929	7.61e-143
PRNP	0.569	7.67e-103
ENSSSCG00000036595	1009	7.74e-153
ENO1	1664	7.76e-236
SCAND1	0.614	7.98e-115
BST2	1511	8.17e-200
SLC3A2	1205	8.27e-145
ORAI1	0.59	8.39e-104
UBTD1	0.449	8.45e-103
ENSSSCG00000030300	1585	8.56e-158
HIF1A	1059	8.62e-108
TCP1	0.797	8.7e-121
CD40	1001	8.75e-130
PDLIM1	0.499	8.79e-141
AARS1	0.52	8.96e-101
ZNF207	0.628	9.18e-106
MRTO4	0.7	9.35e-183
S100A6	1124	9.4e-268
PSMA2	0.847	9.82e-113
TNIP1	0.958	9.9e-180
