# Supplementary material for: Reduced endothelial activation upon human blood perfusion of pig kidney xenografts lacking MHC class I and three xenoantigens
Source: Research Square preprint supplement (doi:10.21203/rs.3.rs-1146675/v1), 2022-01-05
Supplement: Supplementary file 6 [file a5a80782f4d6d6c546eda33e.xlsx]

## Sheet: WT_Pig blood
Table S4: compartment marker genes for each group-top 50
Cortex						Glomeruli						Medulla
rank	gene	avg_logFC	p_val_adj			rank	gene	avg_logFC	p_val_adj			rank	gene	avg_logFC	p_val_adj
1	APOA1	1445	0			1	MGP	2727	0			1	CXCL2	2658	0
2	SPARCL1	1374	0			2	PLAT	2690	0			2	ENSSSCG00000006286	2646	0
3	PLVAP	1221	0			3	ITGA8	2014	0			3	SPP1	2592	0
4	DNASE1L3	1179	0			4	GATA5	2011	0			4	FOS	2490	0
5	TXNIP	1080	0			5	EHD3	1926	0			5	SLC38A2	2444	0
6	CD93	1040	0			6	TBX3	1749	0			6	CCL2	2311	0
7	ENSSSCG00000033189	1002	0			7	ATP13A3	1732	0			7	ATF3	2275	0
8	SLC8A1	0.948	1.27038e-278			8	RIMS2	1571	0			8	BIRC3	2272	0
9	SLC6A6	0.914	8.93226e-234			9	IL33	1548	0			9	ZFP36	2191	0
10	LIMS2	0.86	1.09338e-256			10	DGKB	1234	0			10	BRD2	2091	0
11	TMEM47	0.846	8.32836e-250			11	APBB2	1130	0			11	ND1	2041	0
12	HSPG2	0.819	0			12	NTN4	1130	1.67896e-264			12	ENSSSCG00000029160	2040	0
13	CD36	0.814	5.24501e-210			13	COL12A1	1125	0			13	MT-COX1	1982	0
14	TMEM88	0.784	2.3895e-196			14	ENSSSCG00000049524	1085	0			14	PPP1R15A	1971	0
15	HLA-DRA	0.782	0			15	TNP2	1071	0			15	ADAMTS4	1961	0
16	MGLL	0.776	7.78592e-205			16	EMCN	1047	0			16	SOCS3	1959	0
17	IGFBP7	0.711	0			17	VEGFC	1039	0			17	ADAMTS1	1943	0
18	PTN	0.709	4.53417e-128			18	SLC16A7	1017	0			18	MT-ATP6	1906	0
19	ENSSSCG00000001455	0.701	0			19	CCDC50	1010	0			19	ENSSSCG00000022925	1890	0
20	SELENOP	0.677	4.38536e-209			20	CD9	0.995	0			20	NFKBIZ	1845	0
21	EFNB1	0.669	1.09488e-192			21	CLDN5	0.927	2.43471e-281			21	PHLDA2	1843	0
22	CXCL12	0.658	1.2599e-187			22	GRB14	0.899	0			22	IFRD1	1825	0
23	ENSSSCG00000032436	0.646	0			23	IGFBP5	0.892	0			23	RNF19B	1819	0
24	FABP5	0.642	0			24	AOPEP	0.858	0			24	CTSC	1812	0
25	MPZL1	0.626	2.04626e-110			25	ENSSSCG00000035293	0.85	0			25	CCN1	1810	0
26	EHD4	0.621	7.03596e-257			26	MPPED2	0.847	1.53853e-279			26	CASP10	1795	0
27	SLA-DQB1	0.618	0			27	ENSSSCG00000024791	0.83	0			27	ENSSSCG00000004572	1777	0
28	TM4SF18	0.614	4.37096e-157			28	CD200	0.8	5.54803e-214			28	ARL5B	1774	0
29	ENSSSCG00000038991	0.608	3.51007e-145			29	FMO1	0.784	0			29	BHLHE40	1767	0
30	ENSSSCG00000001456	0.601	1.86947e-270			30	FILIP1	0.783	1.14419e-215			30	FOSB	1727	0
31	CLEC3B	0.596	0			31	KDR	0.782	0			31	GADD45A	1722	0
32	RDX	0.595	5.75847e-146			32	ITGB5	0.782	2.35521e-210			32	ADM	1693	0
33	APLNR	0.592	1.09996e-105			33	SLC9A3R2	0.779	0			33	ATF4	1688	0
34	KITLG	0.586	4.92363e-100			34	SLC39A10	0.778	4.74313e-202			34	HSPH1	1683	0
35	PECAM1	0.578	0			35	ATP2B1	0.775	8.0287e-216			35	SAT1	1667	0
36	FLT1	0.564	0			36	ARL15	0.758	9.40205e-207			36	ENSSSCG00000038215	1663	0
37	SERPINB9	0.564	3.39301e-111			37	RCSD1	0.751	1.2228e-197			37	NUPR1	1658	0
38	SLCO2A1	0.562	1.17259e-89			38	STOM	0.75	7.76334e-180			38	MT-COX3	1658	0
39	SLA-DMB	0.555	1.37193e-130			39	TSC22D1	0.727	0			39	H2AFZ	1624	0
40	TEK	0.539	1.12506e-247			40	PPP3CA	0.724	1.77344e-149			40	RNF122	1607	0
41	VWA1	0.536	1.53854e-98			41	CHRM2	0.723	2.76299e-234			41	SLC25A25	1587	0
42	ITM2A	0.533	6.52189e-124			42	NOSTRIN	0.72	5.00342e-173			42	ICAM1	1576	0
43	TMBIM6	0.524	1.61514e-246			43	ENSSSCG00000028092	0.705	2.70158e-181			43	AKAP12	1573	0
44	ITM2B	0.522	0			44	TMEM150C	0.704	6.41471e-188			44	ARRDC3	1560	0
45	HSD11B1L	0.519	3.87761e-282			45	FERMT1	0.682	3.37994e-178			45	PPP1R10	1545	0
46	ENSSSCG00000012427	0.515	2.76638e-281			46	EFNB2	0.68	9.22947e-160			46	GADD45B	1540	0
47	LFNG	0.512	6.65819e-81			47	ENSSSCG00000015083	0.673	1.29062e-161			47	GADD45G	1535	0
48	ERBB3	0.509	1.476e-198			48	PBX1	0.668	2.2939e-169			48	IER5	1518	0
49	ENSSSCG00000001341	0.502	0			49	NRP1	0.665	1.64343e-234			49	RND1	1516	0
50	NRP2	0.502	1.35624e-87			50	FUCA2	0.656	6.13699e-149			50	NFKBIA	1514	0

## Sheet: WT_Human blood
Table S4: compartment marker genes for each group-top 50
Cortex						Glomeruli						Medulla
rank	gene	avg_logFC	p_val_adj			rank	gene	avg_logFC	p_val_adj			rank	gene	avg_logFC	p_val_adj
1	ESM1	1616	0			1	PLAT	1647	0			1	SPP1	2777	0
2	CXCL10	1254	3.91108e-80			2	MGP	1141	0			2	ENSSSCG00000006286	2579	0
3	PLVAP	1228	0			3	FILIP1	1021	0			3	NUPR1	1770	0
4	THBS1	1191	0			4	ADGRF4	0.894	0			4	VCAM1	1616	8.61466e-232
5	CCL2	1155	0			5	GADD45G	0.855	0			5	PROCR	1606	0
6	IGFBP2	1128	0			6	B3GNT2	0.816	0			6	GEM	1418	0
7	ENSSSCG00000032591	1099	0			7	ENSSSCG00000038506	0.793	0			7	EMP3	1337	0
8	APOA1	1043	0			8	REXO2	0.74	0			8	ENSSSCG00000049691	1310	0
9	UTRN	0.845	0			9	IGFBP5	0.736	0			9	CCL5	1298	8.42666e-201
10	FABP5	0.81	0			10	RDH10	0.726	0			10	PRSS23	1284	3.33208e-200
11	CDC42EP3	0.798	0			11	TLR4	0.713	0			11	GLUL	1217	5.37378e-108
12	SEPTIN11	0.755	0			12	AOPEP	0.71	0			12	RAMP2	1206	3.0994e-179
13	CASP7	0.743	0			13	MGAT4A	0.71	0			13	ADGRG6	1173	0
14	ENSSSCG00000022925	0.741	0			14	CXCL8	0.71	4.42076e-128			14	SMAD1	1172	7.58045e-245
15	TIMP1	0.714	1.10984e-269			15	ANXA1	0.705	0			15	SEMA3D	1159	7.36545e-175
16	SLC1A5	0.706	0			16	RFTN2	0.7	0			16	MT-ND3	1109	5.31126e-138
17	ENSSSCG00000024973	0.684	2.26613e-207			17	REL	0.68	0			17	MBNL1	1100	8.41946e-155
18	CD93	0.667	0			18	KITLG	0.663	0			18	CTSC	1067	2.80879e-178
19	RSAD2	0.665	2.63669e-220			19	TIMP3	0.64	0			19	SDCBP2	1040	0
20	GJA1	0.657	0			20	FAM110A	0.634	0			20	LYVE1	1023	0
21	STC1	0.624	4.59139e-132			21	ESAM	0.633	0			21	VMP1	1009	1.36135e-85
22	IFI6	0.622	0			22	ENSSSCG00000033952	0.631	0			22	PTGS2	1009	1.40928e-38
23	MATN2	0.619	0			23	PLK2	0.613	0			23	S100A6	0.986	6.24912e-218
24	SERPINE2	0.619	8.05643e-141			24	CCL4	0.596	3.12072e-144			24	CCL4	0.985	2.87203e-47
25	RELL1	0.615	0			25	MALT1	0.582	0			25	GALNT1	0.976	1.43254e-109
26	RNF19B	0.609	0			26	IL33	0.553	0			26	NFKBIZ	0.956	1.35992e-44
27	FLT1	0.604	0			27	TLNRD1	0.548	0			27	CD9	0.943	6.47117e-145
28	STC2	0.583	0			28	TSC22D1	0.543	3.25418e-248			28	SLC4A7	0.901	1.5475e-103
29	CAVIN2	0.581	2.56357e-127			29	SEMA7A	0.542	0			29	HS3ST1	0.896	0
30	TSPAN18	0.576	0			30	ZFAND5	0.538	0			30	JAG1	0.89	2.31842e-110
31	CRIM1	0.574	0			31	ADGRE5	0.537	2.39549e-289			31	SESN3	0.887	0
32	SELENOW	0.56	0			32	TFPI2	0.526	1.00246e-249			32	ACKR1	0.882	3.96078e-100
33	APOLD1	0.547	8.35577e-213			33	ARHGAP28	0.524	1.66059e-208			33	EGFL7	0.865	1.85482e-99
34	PLAU	0.542	9.5721e-66			34	RYBP	0.519	0			34	TINAGL1	0.86	3.485e-97
35	MGLL	0.531	0			35	EHD4	0.519	0			35	ENSSSCG00000017754	0.825	8.37487e-78
36	INSR	0.496	1.92417e-233			36	ENSSSCG00000029160	0.518	7.79511e-289			36	ENSSSCG00000036595	0.816	5.72167e-54
37	ENSSSCG00000009240	0.496	2.91794e-216			37	RRAD	0.517	7.9023e-228			37	SLCO4A1	0.793	3.02525e-71
38	DNASE1L3	0.49	2.10463e-188			38	SAMHD1	0.513	6.10594e-282			38	SLC29A1	0.788	3.37981e-119
39	MX2	0.487	5.8182e-195			39	S100A11	0.512	0			39	GSN	0.778	6.60497e-261
40	VWF	0.485	1.9517e-204			40	ENSSSCG00000014043	0.51	0			40	ATP1A1	0.765	9.64804e-105
41	BATF3	0.48	1.93818e-244			41	EGFL7	0.51	0			41	H1-0	0.764	1.13648e-98
42	LAMB1	0.472	5.05518e-214			42	ITGA2	0.509	4.97605e-271			42	PSMB10	0.758	3.17858e-91
43	IGFBP7	0.471	0			43	CD200	0.508	5.22485e-222			43	LTBP1	0.758	1.45662e-74
44	ADAMTS4	0.457	3.52619e-172			44	TNFAIP3	0.498	0			44	CCNL1	0.739	3.43149e-111
45	MX1	0.457	9.45695e-144			45	CYBRD1	0.498	9.8991e-236			45	RAPGEF5	0.736	4.79167e-43
46	ANGPTL4	0.457	5.75781e-110			46	SQLE	0.497	4.73282e-244			46	ENSSSCG00000038215	0.735	1.25475e-183
47	ATF3	0.457	1.76064e-87			47	GRAMD2B	0.492	1.10101e-245			47	CLEC2B	0.732	4.18291e-65
48	WFDC1	0.449	6.05564e-151			48	FERMT1	0.49	4.21717e-266			48	RASGRP3	0.726	6.71864e-75
49	PARP14	0.448	9.91022e-147			49	PDE4D	0.484	3.74462e-245			49	NCOA7	0.724	1.69751e-58
50	HSPG2	0.445	1.423e-229			50	CDK2AP2	0.471	2.82362e-239			50	LGMN	0.721	3.25458e-99

## Sheet: 4KO_Human blood
Table S4: compartment marker genes for each group-top 50
Cortex						Glomeruli						Medulla
rank	gene	avg_logFC	p_val_adj			rank	gene	avg_logFC	p_val_adj			rank	gene	avg_logFC	p_val_adj
1	FABP5	2125	0			1	IER3	1089	0			1	SPP1	2486	0
2	APOA1	1887	0			2	PLAT	1063	0			2	PROCR	2213	0
3	ENSSSCG00000035293	1700	0			3	FAM110A	0.958	0			3	ENSSSCG00000030300	2004	0
4	THBS1	1517	0			4	HBEGF	0.943	0			4	AKAP12	1948	0
5	ENSSSCG00000012119	1430	0			5	PLK2	0.93	0			5	CSRP2	1887	0
6	PLVAP	1351	0			6	REL	0.9	0			6	PRSS23	1855	0
7	VIM	1328	0			7	EHD3	0.897	0			7	PRPF4B	1675	9.3216e-271
8	EGR1	1271	0			8	TNFAIP3	0.867	0			8	DDIT4	1670	1.72377e-232
9	BHLHE40	1269	0			9	IGFBP5	0.804	0			9	IFI6	1636	0
10	APOLD1	1202	0			10	TUBB	0.76	0			10	ROBO4	1612	0
11	DNAJB1	1181	5.77257e-208			11	RASSF9	0.726	1.13872e-244			11	EGFL7	1572	1.0505e-273
12	ENSSSCG00000032591	1040	0			12	CPEB4	0.713	0			12	MAP1B	1557	0
13	CD36	1033	0			13	RYBP	0.706	0			13	IGFBP2	1472	3.36085e-286
14	GJA1	1032	0			14	KIT	0.704	1.00992e-244			14	MT1A	1464	0
15	IGFBP7	1012	0			15	LRRC57	0.693	2.95887e-250			15	ADGRG6	1457	0
16	UTRN	0.983	0			16	ITGA8	0.69	1.2892e-241			16	SEPTIN11	1452	0
17	CRYAB	0.937	2.37871e-105			17	EDN1	0.686	1.08702e-195			17	TAGLN	1423	0
18	CST3	0.898	8.55112e-121			18	CEBPB	0.684	0			18	ACTG1	1411	0
19	CCN1	0.864	0			19	RALA	0.683	0			19	PKIG	1364	0
20	LMCD1	0.833	0			20	ZFP36L1	0.671	0			20	PMP22	1361	0
21	ATF3	0.829	5.38423e-137			21	ZFAND5	0.668	0			21	NRIP1	1360	0
22	CTSC	0.817	0			22	ZMIZ1	0.643	0			22	PTPRE	1354	0
23	RAMP2	0.771	1.2106e-289			23	MGAT4A	0.64	6.34388e-187			23	FAM102A	1344	0
24	MYL12A	0.769	0			24	COL12A1	0.638	7.44218e-197			24	GALNT1	1336	0
25	CYYR1	0.751	6.97006e-178			25	GATA2	0.632	5.04708e-250			25	TINAGL1	1324	0
26	CD93	0.693	0			26	RIMS2	0.623	3.23718e-193			26	AGO2	1304	0
27	CFD	0.681	4.1448e-170			27	MTUS1	0.619	4.74193e-183			27	TGM2	1303	0
28	TMEM47	0.679	2.22045e-276			28	NFKBIE	0.616	4.96086e-226			28	VCAM1	1272	2.94615e-142
29	ENSSSCG00000029160	0.678	1.45772e-55			29	SPRY4	0.614	2.84211e-254			29	H1-0	1228	6.47171e-285
30	CYSLTR2	0.676	1.48098e-184			30	NUAK2	0.613	1.13497e-183			30	ITGB1	1219	0
31	DNAJB4	0.668	2.11606e-109			31	LMNA	0.611	0			31	MGLL	1205	0
32	RGCC	0.661	1.00884e-122			32	CDKN1C	0.611	5.13252e-223			32	IPO11	1201	0
33	ENSSSCG00000039731	0.652	1.71036e-271			33	SLC38A2	0.606	0			33	TPM4	1167	0
34	TMEM204	0.652	1.3211e-186			34	IRF2BP2	0.599	2.43735e-203			34	CD93	1163	0
35	EMP1	0.637	6.1008e-259			35	CFLAR	0.595	1.865e-179			35	CRLF1	1155	0
36	MMRN2	0.637	8.44741e-252			36	ZEB2	0.595	1.35337e-145			36	TP53I11	1127	0
37	CAVIN3	0.623	7.31552e-232			37	PHLDA2	0.588	0			37	RDH10	1122	3.61611e-95
38	FOS	0.622	1.76435e-61			38	ID2	0.587	9.36412e-220			38	PTGS2	1114	1.79387e-73
39	HSPH1	0.62	5.79412e-127			39	ENSSSCG00000003112	0.579	1.43467e-166			39	NUPR1	1113	0
40	TEK	0.608	7.36516e-204			40	PTPN1	0.577	1.51545e-263			40	B4GALT5	1108	0
41	PSAP	0.596	1.08779e-166			41	GRASP	0.574	0			41	RANBP3L	1097	0
42	ENSSSCG00000033734	0.568	1.31948e-219			42	HDAC7	0.572	4.28063e-183			42	BATF3	1095	0
43	TM4SF18	0.561	4.25194e-160			43	TUBB4B	0.568	0			43	ENO1	1093	0
44	ADGRL4	0.549	2.81018e-173			44	CREBRF	0.568	2.19401e-176			44	ACKR3	1087	3.15379e-278
45	LTBP4	0.546	1.05438e-253			45	MCM7	0.567	1.62503e-183			45	SLCO4A1	1084	1.53967e-231
46	CASP7	0.543	2.44693e-175			46	YY1	0.566	3.17122e-277			46	PLVAP	1061	0
47	ITM2B	0.538	4.86326e-233			47	FILIP1	0.563	7.14673e-106			47	ENSSSCG00000038215	1050	0
48	TGFBR2	0.532	7.74209e-102			48	ENSSSCG00000004081	0.557	1.02966e-146			48	GNAT1	1047	3.5063e-278
49	ENSSSCG00000022925	0.531	1.85564e-195			49	TSC22D1	0.555	1.27957e-169			49	ENSSSCG00000022925	1041	3.11509e-280
50	SELENOP	0.527	6.79506e-141			50	NFKBIZ	0.55	2.84605e-208			50	RELL1	1040	0

## Sheet: 4KO_Pig blood
Table S4: compartment marker genes for each group-top 50
Cortex						Glomeruli						Medulla
rank	gene	avg_logFC	p_val_adj			rank	gene	avg_logFC	p_val_adj			rank	gene	avg_logFC	p_val_adj
1	FABP5	1475	0			1	EHD3	2390	0			1	IL6	3268	0
2	PLVAP	1378	0			2	ITGA8	2065	0			2	SPP1	3071	0
3	CD36	1247	0			3	GATA5	2016	0			3	CXCL2	3034	0
4	SLC6A6	1180	0			4	MGP	1867	0			4	ENSSSCG00000030300	2832	0
5	ENSSSCG00000033189	1147	0			5	RIMS2	1720	0			5	ND1	2702	0
6	TXNIP	1135	0			6	IL33	1684	0			6	ENSSSCG00000006286	2693	0
7	RGCC	1107	0			7	ENSSSCG00000049524	1682	0			7	BIRC3	2618	0
8	DNASE1L3	1007	0			8	TBX3	1623	0			8	PTGS2	2612	0
9	LIMS2	1002	0			9	MSMB	1377	0			9	ADAMTS4	2576	0
10	CXCL12	0.979	0			10	PLAT	1320	0			10	AKAP12	2567	0
11	TEK	0.963	0			11	GRB14	1294	0			11	CCL2	2548	0
12	VWF	0.955	0			12	DGKB	1269	0			12	MT-ND3	2330	0
13	LTBP4	0.939	0			13	COL12A1	1191	0			13	ENSSSCG00000001229	2267	0
14	TMEM47	0.892	0			14	AOPEP	1134	0			14	MT-ATP6	2165	0
15	MMRN2	0.889	0			15	PCDH7	1127	0			15	PHLDA2	2154	0
16	SLC8A1	0.885	2.48985e-266			16	CD200	1104	0			16	CCN1	2069	0
17	SPRY1	0.88	0			17	CCDC50	1020	0			17	RDH10	2059	0
18	SERPINB9	0.87	5.27315e-235			18	ENSSSCG00000028092	0.954	0			18	ANGPTL4	1996	0
19	HSPG2	0.861	0			19	ARL15	0.947	0			19	ENSSSCG00000003079	1972	0
20	CCND1	0.86	1.02844e-281			20	PBX1	0.928	0			20	MT-COX1	1968	0
21	HLA-DRA	0.839	0			21	GJA4	0.92	0			21	SERPINE1	1955	5.98192e-270
22	TM4SF18	0.836	0			22	SLC39A10	0.91	0			22	SOD2	1930	0
23	APOA1	0.811	3.89374e-254			23	IGFBP5	0.9	0			23	ENSSSCG00000029160	1927	0
24	CD93	0.807	6.75296e-238			24	CD9	0.884	0			24	ENSSSCG00000022925	1922	0
25	ENSSSCG00000001455	0.797	0			25	CDK19	0.865	0			25	TIMP1	1920	0
26	KITLG	0.796	2.53465e-191			26	NOSTRIN	0.837	0			26	RND1	1901	0
27	HYAL2	0.791	0			27	SLC9A3R2	0.828	0			27	CXCL8	1840	0
28	FMNL2	0.789	2.2861e-226			28	RCSD1	0.823	2.74133e-257			28	DUSP5	1838	0
29	EFNB1	0.786	0			29	PDGFD	0.82	2.7235e-279			29	RNF121	1820	0
30	CYYR1	0.764	0			30	TMEM150C	0.804	2.73374e-255			30	CYCS	1809	0
31	TMEM204	0.753	0			31	TIAM1	0.782	2.49501e-259			31	NFKBIZ	1780	0
32	TMEM88	0.747	5.82542e-183			32	ENPP4	0.754	5.75005e-207			32	NFKBIA	1779	0
33	ENSSSCG00000040410	0.736	0			33	TTC3	0.746	1.13978e-215			33	TUBB6	1775	0
34	TGFBR2	0.712	0			34	CPEB4	0.73	7.20018e-243			34	SAT1	1761	0
35	EPAS1	0.712	0			35	PHACTR2	0.717	2.23229e-185			35	PNP	1759	0
36	FLT1	0.709	0			36	ENSSSCG00000041656	0.713	1.00422e-195			36	ISG15	1745	0
37	SELENOP	0.706	1.01363e-287			37	APBB2	0.707	2.39971e-215			37	ATF3	1732	0
38	CD34	0.703	6.34603e-288			38	FUCA2	0.69	4.55579e-197			38	IFRD1	1689	0
39	RDX	0.693	1.5026e-202			39	PXDN	0.681	8.8673e-173			39	ENSSSCG00000004572	1671	0
40	ECE1	0.689	1.48536e-197			40	NRP1	0.68	0			40	ENSSSCG00000025582	1670	0
41	NFIB	0.683	1.14181e-146			41	MTCH1	0.679	7.81872e-190			41	ARL5B	1668	0
42	SGK1	0.668	0			42	MTSS1	0.671	1.59358e-152			42	VCAM1	1660	0
43	TRIB2	0.662	8.93174e-107			43	PPP3CA	0.671	4.50583e-139			43	HSPA5	1640	0
44	HLX	0.659	4.03955e-133			44	ACVRL1	0.668	4.7964e-195			44	PLAUR	1636	0
45	IRX3	0.643	7.00352e-125			45	CASKIN2	0.664	1.87363e-244			45	PRPF4B	1621	0
46	ENSSSCG00000032591	0.634	1.96646e-273			46	ENSSSCG00000015083	0.661	1.23114e-160			46	PPP1R15A	1603	0
47	EHD4	0.629	4.21185e-159			47	ENSSSCG00000024791	0.66	1.65212e-168			47	PDE4B	1591	0
48	SMARCA2	0.624	6.93643e-104			48	FRMD3	0.657	4.88642e-172			48	ATF4	1571	0
49	COMMD6	0.619	8.46996e-113			49	AMOTL1	0.641	1.1893e-146			49	ZSWIM6	1567	0
50	SLA-DMB	0.618	8.9025e-151			50	EMCN	0.633	0			50	SLCO4A1	1547	0
