# Supplementary material for: Reduced endothelial activation upon human blood perfusion of pig kidney xenografts lacking MHC class I and three xenoantigens
Source: Research Square preprint supplement (doi:10.21203/rs.3.rs-1146675/v1), 2022-01-05
Supplement: Supplementary file 7 [file 78131cde31c4871abdfb39ad.xlsx]

## Sheet: Data quality metrics
Sample ID	Sample Type a	genotype b	perfused blood origin c	Number of Reads d	Sequencing Saturation e	Number of Cells f	Genes per Cell g	UMIs per Cell h	Total Genes i
1	medullary renal ECs	WT	pig	345,334,114	0.793	6,325	1,065	1,935	16,364
2	medullary renal ECs	WT	human	357,064,124	0.826	3,520	1,569	3,342	15,745
3	medullary renal ECs	4KO	human	364,312,987	0.707	7,015	1,083	2,402	16,196
4	medullary renal ECs	4KO	pig	405,652,561	0.809	7,445	950	1,833	16,230
5	Cortical renal ECs	WT	pig	870,504,025	0.863	16,340	1,008	1,607	16,373
6	Cortical renal ECs	WT	human	1,157,535,826	0.769	20,539	1,532	3,782	16,563
7	Cortical renal ECs	4KO	human	832,472,272	0.776	14,921	1,042	2,658	16,436
8	Cortical renal ECs	4KO	pig	709,652,049	0.837	17,883	839	1,316	16,048
a specific region where the cells were isolated from
b genotype of the perfused kidney
c the blood origin used for perfusion
d the total number of reads per sample
e sequencing saturation qeuals the fraction of reads originating from an already-observed UMI
f the number of cells detected in each sample
g the median number of genes detected per cell
h the median number of UMIs detected per cell
i the total number of genes detected per sample

## Sheet: Data visualization
Table S1: Parameters for visualization and clustering of ECs
		WT_Pig blood		WT_Human blood		KO_Human blood		KO_Pig blood
		Sample 1 Medullary region	Sample 5 Cortical region	Sample 2 Medullary region	Sample 6 Cortical region	Sample 3 Medullary region	Sample 7 Cortical region	Sample 4 Medullary region	Sample 8 Cortical region
data pre-processing	threshold of mitochondrial gene expression	0.25	0.25	0.25	0.25	0.25	0.25	0.25	0.25
	minimum cell number for a feature to be considered expressed	3	3	3	3	3	3	3	3
	minimum and maximum features for a cell to be considered as one single cell	300 < n_feature < 3000	300 < n_feature < 3000	300 < n_feature < 3000	300 < n_feature < 3000	300 < n_feature < 3000	300 < n_feature < 3000	300 < n_feature < 3000	300 < n_feature < 3000
highly variable gene selection	selection.method	vst	vst	vst	vst	vst	vst	vst	vst
	Number of features	2000	2000	2000	2000	2000	2000	2000	2000
	number of bins	20	20	20	20	20	20	20	20
integration	dimentions for FindIntegrationAnchors	1:20		1:20		1:20		1:20
	dimentions for IntegrateData	1:20		1:20		1:20		1:20
dimention deduction	scaling	Linear model		Linear model		Linear model		Linear model
	number of PCAs stored	30		30		30		30
	dimention deduction method	umap		umap		umap		umap
	Dimention as input	1:20		1:20		1:20		1:20
clustering	clustering	SNN Graph based		SNN Graph based		SNN Graph based		SNN Graph based
	FindNeighbors	1:20		1:20		1:20		1:20
	resolution	0.03		0.12		0.03		0.02
